# Supplementary material for: LncRNAs Expression in Preeclampsia Placenta Reveals the Potential Role of LncRNAs Contributing to Preeclampsia Pathogenesis
Source: PLoS One. 2013 Nov 28;8(11):e81437. doi: 10.1371/journal.pone.0081437 (PMC3842959; doi:10.1371/journal.pone.0081437)
Supplement: Table S2 — Basic Medical Records of preeclampsia and control cases. (XLS) [file pone.0081437.s002.xls]

## Sheet: Sheet1
Patient Number	Age（years）	gestational weeks		G.P.	Urine protein	MAP(mmHg)
N1	31	40+4		G1P0	_	89.3
N2	28	39		G4P0	_	89.3
N3	35	39+2		G1P0	_	101
N4	23	39+3		G1P0	_	84.3
N5	29	39+6		G1P0	_	86.7
T1	30	38+6		G3P0	3+	131
T2	36	37		G2P1	2+	121.7
T3	25	38+5		G1P0	3+	129.7
T4	22	38+1		G1P0	3+	113
T5	21	38+6		G1P0	3+	121.7
T6	28	39		G1P0	2+	120.7

## Sheet: Sheet2
Patient Number	Age（years）	gestational weeks	G.	P.	Urine protein	MAP(mmHg)				Patient Number	Age（years）	gestational weeks	G.	P.	Urine protein(+)	MAP(mmHg)
N1	31	40+4	1	0	_	89.33				T1	30	38+6	3	0	3	131
N2	28	39	4	0	_	89.33				T2	36	37	2	1	2	121.67
N3	35	39+2	1	0	_	101				T3	25	38+5	1	0	3	129.67
N4	23	39+3	1	0	_	84.33				T4	22	38+1	1	0	3	113
N5	29	39+6	1	0	_	86.67				T5	21	38+6	1	0	3	121.67
N6	32	37+2	5	0	_	96.67				T6	28	39	1	0	2	120.67
N7	24	35+2	4	1	_	86.67				T7	34	35+2	8	1	2	136.33
N8	30	37	3	0	_	92				T8	24	40+4	2	0	2	113.33
N9	31	38	2	1	_	89.33				T9	27	38+1	1	0	3	112.67
N10	27	37+5	4	0	_	96.67				T10	28	38+6	1	0	2	118
N11	29	31+5	5	1	_	82.67				T11	33	38+1	1	0	2	119.33
N12	24	39+6	1	0	_	83.33				T12	23	41+3	2	1	2	115.33
N13	27	39	4	1	_	84.33				T13	35	40+1	6	0	2	130.33
N14	27	37+1	2	0	_	90				T14	29	37+3	1	1	2	111.33
N15	34	38+5	4	1	_	84.33				T15	22	38+1	4	0	2	122
N16	35	40+1	8	0	_	90				T16	26	35+6	1	1	3	131.33
N17	32	38+1	4	0	_	79.67				T17	41	34+6	6	0	3	107.33
N18	33	39+3	2	0	_	100				T18	25	36+4	2	1	3	118.67
N19	30	35+1	3	0	_	101.67				T19	22	36+1	2	0	3	116.67
N20	23	39+4	1	0	_	90				T20	30	34+6	1	0	3	100.33
N21	25	37+5	2	1	_	90.67				T21	28	40+4	4	1	3	116
N22	25	39+1	5	0	_	104				T22	21	41+3	3	0	3	114.67
N23	25	39+1	1	0	_	85.33				T23	18	37+3	1	0	3	117.67
N24	36	38+1	3	0	_	90				T24	29	36+6	3	0	3	118.67
N25	23	41+4	2	1	_	93.67				T25	20	36+5	4	0	3	116
N26	25	37+2	1	0	_	103.33				T26	34	36+2	4	1	3	129
N27	42	36+1	1	0	_	90				T27	21	37	2	0	3	120
N28	37	38+4	5	0	_	90				T28	24	37	3	0	3	115
N29	34	38+4	3	1	_	90				T29	28	34+1	4	0	3	128.33
N30	28	35+2	6	0	_	95				T30	28	37+6	3	0	3	121.67
N31	43	36+4	3	1	_	87.67				T31	39	34+5	2	0	3	133.33
N32	24	39	2	0	_	96.67				T32	39	39	4	0	3	121.67
N33	34	40	4	0	_	90				T33	41	37	2	0	2	129
N34	34	40+1	2	0	_	90.67				T34	22	35+3	4	0	3	116.67
N35	27	39	4	0	_	80				T35	36	34+3	2	0	3	113.33
N36	25	38+3	1	0	_	93.33				T36	42	32+1	3	0	3	130.67
N37	27	39+3	1	0	_	90				T37	30	31+4	2	1	3	129
N38	25	37+5	1	0	_	71.67				T38	30	36+6	4	0	2	114.33
N39	29	38	4	0	_	90				T39	35	35+3	4	1	2	116.33
N40	30	40+2	1	0	_	90				T40	23	35+3	3	0	3	121.67
	29.5385	38.625	2.84615	0.230769	_	90.2503					28.725	37.6667	2.69231	0.25641	2.66667	120.308
	5.08789	0.916125	1.72502	0.426833	_	6.69712					6.5162	1.0328	1.64083	0.442359	0.477567	7.83856
