# Supplementary material for: LncRNAs Expression in Preeclampsia Placenta Reveals the Potential Role of LncRNAs Contributing to Preeclampsia Pathogenesis
Source: PLoS One. 2013 Nov 28;8(11):e81437. doi: 10.1371/journal.pone.0081437 (PMC3842959; doi:10.1371/journal.pone.0081437)
Supplement: Table S6 — Differentially Expressed mRNAs. (XLS) [file pone.0081437.s006.xls]

## Sheet: T vs N_up
# Fold-Change cut-off: 1.5 # P-value cut-off: 0.05 # Condition pairs: T vs N # Column A: ProbeName, it represents probe name. # Column B: P-value, P-value calculated from t-test. # Column C: FCAbsolute, the absolute ratio (no log scale) of normalized intensities between two conditions. # Column D: Regulation, it depicts which group has greater or lower intensity values wrt other group. # Column E…
T vs N 1.5 fold up regulated mRNAs
	P-value	Fold change and Regulation		Group--Raw Intensity		Group--Normalized Intensity		Raw Intensity											Normalized Intensity											Annotations
ProbeName	p-value	FCAbsolute	regulation	T(raw)	N(raw)	T(normalized)	N(normalized)	[32, N](raw)	[34, T](raw)	[42, T](raw)	[50, N](raw)	[63, N](raw)	[71, N](raw)	[81, N](raw)	[86, T](raw)	[90, T](raw)	[95, T](raw)	[114, T](raw)	[32, N](normalized)	[34, T](normalized)	[42, T](normalized)	[50, N](normalized)	[63, N](normalized)	[71, N](normalized)	[81, N](normalized)	[86, T](normalized)	[90, T](normalized)	[95, T](normalized)	[114, T](normalized)	type	seqname	GeneSymbol	source	RNAlength	chrom	strand	txStart	txEnd	Xhyb	probeSeq	EntrezID	unigene	GO	ProteinAccession	product
ASHG19A3A005781	0.0194394	1.59746	up	1748.73	1037.47	10.6138	9.93801	518.103	1795.03	1853.1	1232.08	644.033	1550.02	1243.09	1066.83	722.696	2584.86	2469.83	9.76396	10.659	10.8216	10.1231	10.0122	9.92215	9.86873	10.5526	9.63649	11.0468	10.9662	coding	NM_130800	MEN1	RefSeq_coding	2748	chr11	-	64570995	64578035		CCTAGTGTGGGATGTAAGCGCGGAGGCCGCCGCCCACCGCCCGCCGCCATGGGGCTGAAG	4221	Hs.423348	GO:0070412|GO:0000403|GO:0003690|GO:0000400|GO:0018024|GO:0047485|GO:0005515|GO:0006281|GO:0000165|GO:0007420|GO:0034968|GO:0046329|GO:0045786|GO:0008285|GO:0045736|GO:0001933|GO:0043433|GO:0051974|GO:0000122|GO:0030511|GO:0032925|GO:0006974|GO:0009411|GO:0010332|GO:0000785|GO:0032154|GO:0005737|GO:0005829|GO:0035097|GO:0035097|GO:0016363|GO:0005730|GO:0005634|GO:0043234|GO:0005625	NP_570716	Multiple endocrine neoplasia I
ASHG19A3A013044	0.0444723	1.84086	up	40.5713	23.0868	5.29275	4.41238	18.6747	38.2559	50.1358	31.4484	16.3129	24.5273	24.4705	34.5404	48.3089	47.4359	24.7506	5.05542	5.11123	5.69934	4.98394	3.17101	4.28283	4.56868	5.33557	5.80028	5.35908	4.45103	coding	NM_013289	KIR3DL1	RefSeq_coding	1986	chr19	+	55327892	55342232		CCTTCTGTCAGCAGTGAAACTTATAAAATTTTTTGTGATTTCAATGTAGCTGTCTCCTCT	3811	Hs.645228	GO:0030109|GO:0004872|GO:0006955|GO:0050776|GO:0005887|GO:0005886	NP_037421	Killer cell immunoglobulin-like receptor, three domains, long cytoplasmic tail, 1
ASHG19A3A006693	0.0436521	1.57099	up	39.0338	25.6109	5.1792	4.52752	8.90146	35.8909	19.7218	30.3483	27.2514	35.216	26.3374	28.354	46.065	57.5346	46.6369	3.98702	5.0208	4.30628	4.93463	4.32503	4.73201	4.6589	5.04242	5.73164	5.62297	5.35107	coding	NM_183415	UBE3B	RefSeq_coding	5404	chr12	+	109915438	109974506		GTGCGGGGACCTCCGGCGAATAAAGAAAAAATAACAAGCTTTTCTGAAGTGAGAAGCTGT	89910	Hs.374067	GO:0016881|GO:0016874|GO:0004842|GO:0006464|GO:0042787|GO:0005622	NP_904324	Ubiquitin protein ligase E3B
ASHG19A3A002333	0.0398531	2.61133	up	155.477	60.0015	6.88492	5.50014	21.7132	145.917	84.0022	70.3704	23.9495	119.244	64.7307	91.1202	33.4208	323.857	254.542	5.27053	6.99931	6.45056	6.10152	4.0374	6.28797	5.80327	6.78331	5.27795	8.05503	7.74335	coding	NM_001135651	EIF2AK2	RefSeq_coding	2696	chr2	-	37333698	37384190		gcggcggcggcggcggcggcggcggcgCAGTTTCTGGAGCAAATTCAGTTTGCCTTCCTG	5610	Hs.131431	GO:0005524|GO:0003725|GO:0004694|GO:0000166|GO:0005515|GO:0008601|GO:0004674|GO:0030683|GO:0044419|GO:0019054|GO:0008285|GO:0033689|GO:0046777|GO:0006468|GO:0009615|GO:0019058|GO:0019048|GO:0005829|GO:0005622	NP_002750	Eukaryotic translation initiation factor 2-alpha kinase 2
ASHG19A3A003960	0.0115485	2.36098	up	2996.59	1187.48	11.2823	10.0429	562.302	2971.55	2259.55	2174.97	616.468	1060.28	1523.37	1293.32	1115.43	5198.58	5141.09	9.87465	11.4135	11.0891	10.9099	9.94109	9.33742	10.1514	10.8274	10.2644	12.065	12.0343	coding	NM_001895	CSNK2A1	RefSeq_coding	2732	chr20	-	463337	524482		GCCGCCGCTGCCGCTTCCACCACAGTTTGAAGAAAACAGGTCTGAAACAAGGTCTTACCC	1457	Hs.644056	GO:0005524|GO:0000166|GO:0047485|GO:0005515|GO:0004674|GO:0016055|GO:0007411|GO:0006468|GO:0007165|GO:0016581|GO:0016580|GO:0005829|GO:0005634|GO:0005886	NP_808228	Casein kinase 2, alpha 1 polypeptide
ASHG19A3A007908	0.021571	1.57131	up	11.5459	7.59175	3.41385	2.76188	5	12.6761	8.56266	5.59589	15.5325	6.23089	5.59949	12.7723	6.71844	19.2774	9.26845	2.53526	3.53802	2.99039	2.64358	3.0667	2.68362	2.88024	3.85152	3.03458	4.08981	2.9788	coding	NM_201432	GAS7	RefSeq_coding	8181	chr17	-	9813925	9940064		TATGCAATGTAGTGGGTTCTTTGTGAAAGAACAGCAATGAGCAAAGCCACAGGAACCTCC	8522	Hs.462214	GO:0003700|GO:0007050|GO:0030154|GO:0007275|GO:0007399|GO:0006351|GO:0005737	NP_958839	Growth arrest-specific 7
ASHG19A3A021122	0.042016	1.75722	up	36.9723	19.8236	5.0661	4.2528	13.5504	26.8603	22.9684	29.8009	21.411	17.9008	16.455	47.8978	17.6998	57.4882	48.9192	4.58	4.61784	4.5432	4.91154	3.79007	3.89851	4.08389	5.82905	4.36342	5.62168	5.42141	coding	NM_004704	RRP9	RefSeq_coding	1588	chr3	-	51967445	51975922		ACTGCACAGGAAAAGAAGCTGCGCTTGGCCAAGCTCTACCTAGAGCAGCTCCGTCAGCAA	9136	Hs.153768	GO:0003723|GO:0006364|GO:0005730|GO:0005634|GO:0030532|GO:0005732	NP_004695	Ribosomal RNA processing 9, small subunit (SSU) processome component, homolog (yeast)
ASHG19A3A030039	0.0139303	1.63244	up	65.4615	41.3459	5.95386	5.24683	20.3639	94.9042	66.6371	30.6932	39.2826	46.3772	70.0123	61.5423	33.4263	65.0057	71.2536	5.18055	6.39087	6.10889	4.94961	5.12748	5.07164	5.9049	6.19337	5.27817	5.79685	5.95502	coding	NM_016513	ICK	RefSeq_coding	6238	chr6	-	52866097	52926600		AGCTGTGCTAGGCTGAGGGAATTCCACACTGAATTTTACAAGCGGGATGGATTTCTCTAA	22858	Hs.417022	GO:0005524|GO:0004693|GO:0000287|GO:0000166|GO:0004674|GO:0016740|GO:0007243|GO:0007275|GO:0006468|GO:0007165|GO:0005737|GO:0005829|GO:0043231|GO:0005634	NP_057597	Intestinal cell (MAK-like) kinase
CUST_57_PI426249100	0.0383128	2.79584	up	240.145	86.0194	7.55012	6.06684	98.765	219.739	71.4601	39.5298	35.4979	193.254	63.0503	173.944	196.616	639.321	139.794	7.44471	7.59319	6.20701	5.30113	4.89413	6.92467	5.76956	7.7584	7.80913	9.02431	6.90868	coding	NM_019558_Exon2+	NM_019558	HOX cluster	682	chr2	+	176996044	176996726	NM_019558,	TCTGAGCTAGTGATTTGCCTCAACAACGTAAACTTCCTAATGATTAGCACTTAATAATTG
ASHG19A3A023623	0.0486129	2.39114	up	63.8751	33.5083	5.91107	4.65337	13.1848	44.0747	69.1516	51.886	13.7447	31.8969	56.829	97.9314	46.407	41.8982	83.7878	4.53972	5.30685	6.1616	5.67874	2.80426	4.61018	5.63396	6.89435	5.74201	5.18241	6.1792	coding	NM_001163646	HTR3D	RefSeq_coding	1786	chr3	+	183750618	183757156		TCTCAGTCTCTGCTCACTACAGGAAATGGCGACACTTTGATTATCAATTGCCCAGGCTTT	200909	Hs.448004	GO:0005230|GO:0005216|GO:0004872|GO:0034220|GO:0055085|GO:0016021|GO:0005886	NP_872343	5-hydroxytryptamine (serotonin) receptor 3 family member D
ASHG19A3A018506	0.0320378	1.90499	up	98.9967	51.2981	6.53867	5.60888	38.2609	71.5884	103.415	97.0473	51.9585	37.099	32.1248	98.5166	59.8931	97.7744	162.792	6.07651	5.98842	6.75183	6.54737	5.72372	4.79708	4.89973	6.90298	6.10696	6.36565	7.11617	coding	NM_016592	GNAS	RefSeq_coding	2581	chr20	+	57414794	57486249		CCCATCCGGCGTCACTAATGGAGGACGCCGTCCAGATTCTCCTTGTTTTCATGGATTCAG	2778	Hs.125898	GO:0031683|GO:0005525|GO:0003924|GO:0003924|GO:0004016|GO:0019001|GO:0005085|GO:0042802|GO:0035255|GO:0003674|GO:0031852|GO:0000166|GO:0005515|GO:0004871|GO:0004871|GO:0007186|GO:0006184|GO:0006184|GO:0007190|GO:0007191|GO:0007191|GO:0007596|GO:0006171|GO:0051216|GO:0071377|GO:0048701|GO:0035116|GO:0001958|GO:0006112|GO:0007565|GO:0046907|GO:0030168|GO:0045669|GO:0045672|GO:0040032|GO:0009791|GO:…	NP_536351	GNAS complex locus
ASHG19A3A035914	0.0263604	2.59219	up	248.059	90.4543	7.62256	6.24839	30.9047	95.8212	208.99	128.639	47.7519	110.282	134.694	126.185	393.69	128.297	535.373	5.77403	6.40363	7.7353	6.94292	5.55384	6.18866	6.78248	7.2709	8.79125	6.74769	8.78657	coding	NM_022133	SNX16	RefSeq_coding	3471	chr8	-	82711819	82754521		TTTGCTCTCTCTATCTTGCAAATAGGAGTCCTTAAAGACAACTGGGAGAAGGGGTTTGAG	64089	Hs.492121	GO:0042802|GO:0035091|GO:0007154|GO:0045022|GO:0008333|GO:0006622|GO:0015031|GO:0005737|GO:0005769|GO:0031901|GO:0031313|GO:0005770|GO:0031902|GO:0005764	NP_690050	Sorting nexin 16
ASHG19A3A003792	0.0353149	1.79853	up	12.7592	6.54137	3.53056	2.68374	6.78856	10.7924	12.1972	5.39859	10.5197	5	5	5.03319	13.2846	13.63	21.6176	3.61734	3.3026	3.55589	2.60936	2.43558	2.36492	2.3915	2.53154	3.94992	3.59262	4.25078	coding	NM_001177716	KLF11	RefSeq_coding	3906	chr2	+	10183955	10194963		GCGTGCAGGGCTTCGCTGCGGCCGCGCCGGTTGACATCATGGACATATGTGAGTCCATCC	8462	Hs.12229	GO:0003677|GO:0046872|GO:0003700|GO:0008270|GO:0006915|GO:0008285|GO:0000122|GO:0006366|GO:0005622|GO:0005634	NP_003588	Kruppel-like factor 11
ASHG19A3A003857	0.0177053	1.93613	up	97.7113	50.7647	6.47288	5.5197	23.0026	96.0958	92.2443	36.2017	43.8259	78.8377	71.9555	50.3836	165.382	58.4083	123.753	5.35222	6.40733	6.58854	5.17844	5.36771	5.75758	5.94256	5.90482	7.54881	5.64525	6.74253	coding	NM_001184690	NPNT	RefSeq_coding	4643	chr4	+	106816596	106892827		GCCAGGATAAGGTGCCAGCTCAAAGCTGTGTGCCAACCACGATGCAAACATGGTGAATGT	255743	Hs.518921	GO:0005509|GO:0007155|GO:0030154|GO:0007275|GO:0005576|GO:0016020|GO:0005578	NP_001171622	Nephronectin
ASHG19A3A037800	0.0359391	1.62365	up	2735.17	1703.08	11.2571	10.5579	771.676	3275.83	2606.65	2107.63	709.772	2778.77	2147.58	1728.67	1036.98	4061.61	3701.25	10.3087	11.5603	11.2928	10.871	10.1607	10.7954	10.6537	11.2546	10.1626	11.723	11.5495	coding	NM_052820	CORO2A	RefSeq_coding	5507	chr9	-	100883257	100954956		AGCGCGGAGCCGGAGCTGGACGCCGCCGCCGCCACCGCCACCTGCGCGGCAGTCATCAAG	7464	Hs.113094	GO:0051015|GO:0030036|GO:0035556|GO:0015629|GO:0017053	NP_438171	Coronin, actin binding protein, 2A
ASHG19A3A044678	0.0370226	1.72835	up	14.9553	7.86051	3.82943	3.04003	8.84979	9.07091	20.9798	8.81869	9.73176	5.24309	6.65925	14.1039	10.7709	16.1475	18.6589	3.97845	3.05824	4.40414	3.18726	2.40927	2.56131	3.06389	3.99556	3.65006	3.83267	4.03592	coding	NM_001083909	GPR123	RefSeq_coding	4298	chr10	+	134901408	134945178		CCACCATTCAACCAAAGAAAGTCAACATTGAACATTAAACCTCTGTGTGTTTCTATACTG	84435	Hs.435183	GO:0004930|GO:0007186|GO:0007165|GO:0016021|GO:0005886	NP_001077378	G protein-coupled receptor 123
ASHG19A3A011760	0.0186224	1.61057	up	33.8958	22.3454	5.02408	4.33651	10.8148	32.368	28.3866	29.0841	19.3966	30.726	21.7054	33.913	20.3289	42.9302	45.448	4.25109	4.87938	4.8688	4.87818	3.56804	4.56347	4.42176	5.30987	4.55866	5.21328	5.31447	coding	NM_003830	SIGLEC5	RefSeq_coding	2498	chr19	-	52114781	52133727		TTATGAGACCCATAGGAATCCTTCCAACAGCCAAAGAGTTGAGTCTAACTCTTTCCTGCC	8778	Hs.310333	GO:0005529|GO:0007155|GO:0016021|GO:0016020	NP_003821	Sialic acid binding Ig-like lectin 5
ASHG19A3A018252	0.00688583	2.18053	up	21425.6	9096.91	14.2005	13.0758	7671.39	20996.3	25944.7	7241.38	5098.8	12988.4	12484.6	5914.85	31661.5	17727	26309.2	13.379	14.2535	14.6473	12.6332	13.0731	13.1748	13.1187	13.0562	14.9693	13.8675	14.409	coding	NM_006404	PROCR	RefSeq_coding	1483	chr20	+	33759773	33765164		TCAGACTTGGGATGGGACGCTGATATAATAGGGTAGAAAGAAGTAACACGAAGAAGTGGT	10544	Hs.647450	GO:0004872|GO:0019882|GO:0007596|GO:0006955|GO:0042612|GO:0005813|GO:0005887|GO:0016020	NP_006395	Protein C receptor, endothelial
ASHG19A3A022464	0.0407407	2.11004	up	126.445	75.7764	6.85297	5.7757	14.8114	165.507	111.555	87.1399	42.1512	56.5036	178.276	98.6174	53.8203	183.966	145.207	4.71042	7.18134	6.85712	6.39359	5.28205	5.32547	7.16697	6.90512	5.95228	7.2605	6.96144	coding	NM_001106	ACVR2B	RefSeq_coding	11373	chr3	+	38495789	38534631		ACTTTAAAAGTAAGAATGTATTGCTGAAGAGCGACCTCACAGCCGTGCTGGCTGACTTTG	93	Hs.174273	GO:0005524|GO:0048185|GO:0016362|GO:0019838|GO:0046872|GO:0000166|GO:0005515|GO:0004674|GO:0004712|GO:0004872|GO:0004702|GO:0005024|GO:0030509|GO:0030509|GO:0032147|GO:0009952|GO:0007368|GO:0048617|GO:0001702|GO:0007507|GO:0030073|GO:0001822|GO:0030324|GO:0007498|GO:0042475|GO:0035265|GO:0060021|GO:0031016|GO:0007389|GO:0032927|GO:0030501|GO:0045669|GO:0009791|GO:0006468|GO:0009749|GO:0007165|GO:…	NP_001097	Activin A receptor, type IIB
ASHG19A3A047590	0.0457341	1.83663	up	2312.99	1188.19	10.8962	10.0191	435.367	2487.92	2166.01	1547.08	631.967	2255.18	1071.34	913.358	770.902	3618.18	3921.59	9.5227	11.1309	11.0348	10.4364	9.9842	10.4824	9.66986	10.3077	9.72412	11.5506	11.6289	coding	NM_001033873	SMAGP	RefSeq_coding	1076	chr12	-	51639132	51663994		GGGAACGCCGCTCCCCGACGCACCGGCCGCCCCCAGCGCAGCGCGCTCCGCGGGGTGCTG	57228	Hs.652389	GO:0031410|GO:0030659|GO:0016021|GO:0005886	NP_001029045	Small cell adhesion glycoprotein
ASHG19A3A046460	0.0215919	1.80972	up	54.737	31.2463	5.71129	4.85553	22.7891	41.1107	76.0084	44.1063	21.932	32.4214	34.9826	41.3186	40.8179	66.7205	62.4456	5.33794	5.21265	6.29713	5.45742	3.84465	4.6314	5.00624	5.60048	5.55881	5.83329	5.76539	coding	NM_023945	MS4A5	RefSeq_coding	762	chr11	+	60197061	60215259		CCATATCCAAGGTTTCCCTTTATATTTCTTTCAGGATATCCATTCTGGGGCTCTGTTTTG	64232	Hs.178066	GO:0004872|GO:0016021|GO:0016020	NP_076434	Membrane-spanning 4-domains, subfamily A, member 5
ASHG19A3A001121	0.0315298	2.09287	up	36.5929	14.4897	4.84028	3.7748	9.6514	26.5018	16.6987	17.7544	18.224	19.5401	7.27846	23.2307	20.9631	105.143	27.0202	4.09758	4.59941	4.05045	4.19065	3.43068	4.00266	3.15243	4.74057	4.60265	6.46993	4.57866	coding	NM_001025197	CHI3L2	RefSeq_coding	1456	chr1	+	111770280	111786060		CCACCATGGACCAGAAGTCTCTCTGGGCAGGATCTGCCTACAAACTGGTTTGCTACTTTA	1117	Hs.514840	GO:0043169|GO:0004568|GO:0016787|GO:0005975|GO:0006032|GO:0005576|GO:0005615	NP_003991	Chitinase 3-like 2
ASHG19A3A029890	0.000584306	9.57333	up	1884.77	144.837	10.3318	7.0728	113.279	342.123	1118.83	210.758	87.8867	226.06	86.2022	1037.96	1634.9	1349.38	5825.41	7.62603	8.24833	10.1231	7.63206	6.77217	7.14813	6.18558	10.5075	10.8025	10.0949	12.2146	coding	NM_018643	TREM1	RefSeq_coding	948	chr6	-	41243711	41254457		AAGACTACCATGATCATGGTTTACTGCGCGTCCGAATGGTCAACCTTCAAGTGGAAGATT	54210	Hs.283022	GO:0004872|GO:0007596|GO:0006959|GO:0035556|GO:0050900|GO:0005576|GO:0016021|GO:0005886	NP_061113	Triggering receptor expressed on myeloid cells 1
ASHG19A3A005010	0.0439202	1.63317	up	1067.78	579.186	9.80742	9.09975	326.593	979.547	883.872	749.972	322.846	753.106	743.41	492.781	425.148	1926.07	1699.28	9.13345	9.78906	9.78536	9.41466	8.96618	8.84027	9.14417	9.34937	8.89527	10.6055	10.4199	coding	NM_018194	HHAT	RefSeq_coding	3641	chr1	+	210502249	210849638	NM_001170588,	CGCCGCCGCCCGGGACAGCCCGGAGAAACTCTCAGCGTAGGCATCGGGAACCTTCGTGCC	55733	Hs.58650	GO:0005525|GO:0000166|GO:0016409|GO:0016740|GO:0007275|GO:0018345|GO:0007224|GO:0005783|GO:0005789|GO:0016021|GO:0016020	NP_060664	Hedgehog acyltransferase
ASHG19A3A003689	0.010689	1.96862	up	20.6094	11.8642	4.29616	3.31897	5.59341	17.5609	23.1449	9.2075	18.9376	20.5825	5	21.3136	12.0196	31.4413	18.1758	3.37158	4.02031	4.55587	3.24305	3.51736	4.07137	2.3915	4.61225	3.80781	4.77976	4.00098	coding	NM_001172746	SEC23B	RefSeq_coding	3364	chr20	+	18488209	18542058		TTCTACAATTGAGTACGTGATACAGGAAGATGACCTTCAAGCACTCAAAGAGTCCCTGCA	10483	Hs.369373	GO:0008270|GO:0006888|GO:0006886|GO:0016192|GO:0030127|GO:0033116|GO:0005794|GO:0000139|GO:0005783|GO:0005789|GO:0043231|GO:0016020|GO:0048471	NP_116781	Sec23 homolog B (S. cerevisiae)
ASHG19A3A020514	0.0148118	1.58475	up	22.1947	14.6849	4.43951	3.77526	7.77337	22.6064	18.4063	20.9619	16.055	12.6636	15.9706	17.3058	22.7385	23.7983	28.3127	3.80004	4.37691	4.20044	4.4212	3.13697	3.46828	4.04977	4.30344	4.72242	4.39024	4.64362	coding	NM_152613	WBP2NL	RefSeq_coding	2330	chr22	+	42394728	42424475	CU692690,	TAGTCTTCAGAAATGGAGATGCCATTGAATTTGCCCAGTTGATGGTGAAAGCTGCCTCTG	164684	Hs.655541	GO:0050699|GO:0007343|GO:0035039|GO:0007126|GO:0033011	NP_689826	WBP2 N-terminal like
ASHG19A3A014817	0.0238622	1.52533	up	1501.37	927.037	10.4019	9.79278	469.595	1671.71	1282.11	1186.27	638.507	1278.43	1062.38	935.768	713.723	2524.79	1880.15	9.62105	10.5548	10.3036	10.0641	9.99868	9.62417	9.65587	10.345	9.62383	11.0135	10.5705	coding	NM_002156	HSPD1	RefSeq_coding	2339	chr2	-	198351309	198364640		TCCCTCACTCGCCGCCGACGACCTGTCTCGCCGAGCGCACGCCTTGCCGCCGCCCCGCAG	3329	Hs.727543	GO:0005524|GO:0016887|GO:0003688|GO:0043498|GO:0051087|GO:0001530|GO:0000166|GO:0002039|GO:0005515|GO:0003697|GO:0051082|GO:0051082|GO:0006458|GO:0006200|GO:0042113|GO:0002368|GO:0042100|GO:0002755|GO:0042110|GO:0006919|GO:0008219|GO:0051131|GO:0044419|GO:0048291|GO:0043066|GO:0050870|GO:0050870|GO:0002842|GO:0043065|GO:0032727|GO:0032729|GO:0032729|GO:0032733|GO:0032735|GO:0032755|GO:0043032|GO:…	NP_955472	Heat shock 60kDa protein 1 (chaperonin)
ASHG19A3A034798	0.0195803	1.79213	up	21.4958	13.1432	4.37684	3.53517	6.7941	20.091	15.7181	15.0318	11.2732	23.6589	8.95769	21.7016	16.4694	28.4971	26.4974	3.61875	4.21674	3.95365	3.94719	2.49727	4.23933	3.3733	4.63954	4.25799	4.64076	4.55238	coding	NM_012447	STAG3	RefSeq_coding	4285	chr7	+	99775537	99812010		ATCTTTAGCCCTCAGATGATTGTTGGGGGCCGTGATTTCCTTAGGCCACTTGTCTTTTTT	10734	Hs.592283	GO:0005488|GO:0007049|GO:0007059|GO:0007126|GO:0007130|GO:0005694|GO:0000775|GO:0001673|GO:0030893|GO:0005634|GO:0000795|GO:0000802	NP_036579	Stromal antigen 3
ASHG19A3A047698	0.0326633	1.57635	up	35.1656	20.7334	5.03387	4.37728	14.8304	31.0396	20.74	20.0276	32.2753	16.3924	20.1415	22.1529	39.7359	47.8036	49.5214	4.7128	4.8181	4.38755	4.35998	4.6911	3.79352	4.32901	4.67015	5.52116	5.36756	5.43872	coding	NM_012137	DDAH1	RefSeq_coding	3991	chr1	-	85784168	85930889		CCGGACTGCGTCTTCGTGGAGGACGTGGCCGTGGTGTGCGAGGAGACGGCCCTCATCACC	23576	Hs.727516	GO:0003824|GO:0016403|GO:0016787|GO:0046872|GO:0006527|GO:0000052|GO:0007263|GO:0005737	NP_036269	Dimethylarginine dimethylaminohydrolase 1
ASHG19A3A010675	0.0296939	1.89032	up	12.3392	6.95142	3.44147	2.52284	5	19.8963	5.76682	5	14.7571	5	5	14.5586	6.66029	7.64775	19.5054	2.53526	4.20236	2.5198	2.3662	2.95634	2.36492	2.3915	4.04186	3.02302	2.76283	4.09896	coding	NM_015879	ST8SIA3	RefSeq_coding	10154	chr18	+	55019720	55036159		ACACAGAGGTCAGTTAAAAGTCCAACTGGCTTGGCCGGGAAATATAATGCAACATGTCAA	51046	Hs.23172	GO:0003828|GO:0008373|GO:0006491|GO:0044267|GO:0006688|GO:0009311|GO:0043687|GO:0018279|GO:0006486|GO:0005794|GO:0000139|GO:0030173|GO:0016021|GO:0016020	NP_056963	ST8 alpha-N-acetyl-neuraminide alpha-2,8-sialyltransferase 3
ASHG19A3A052317	0.0296913	1.74537	up	16.7821	8.65066	3.98075	3.17722	6.70114	12.0298	12.255	10.9499	7.0298	6.16946	12.403	16.5359	12.3386	23.2074	24.3261	3.59955	3.46117	3.5629	3.48896	2.36661	2.67699	3.75397	4.23496	3.84514	4.35572	4.4246	coding	NM_001004439	ITGA11	RefSeq_coding	5035	chr15	-	68594049	68724492		ATCAAATACATCGCCAGTGACCCTGATGACAAGCACTTCTTCAATGTCACTGATGAGGCT	22801	Hs.436416	GO:0005518|GO:0004872|GO:0007155|GO:0007160|GO:0007229|GO:0007517|GO:0016021|GO:0008305|GO:0005886	NP_001004439	Integrin, alpha 11
ASHG19A3A049365	0.0439379	2.22166	up	14645.1	6641.19	13.6887	12.5371	4131.81	21764.1	9345.73	4385.8	13684.6	5563.33	5440.44	7204.03	10809.9	23801.2	14945.9	12.5639	14.3147	13.1743	11.9095	14.4115	11.8766	11.9239	13.3373	13.4463	14.2933	13.5666	coding	NM_001159920	FLT1	RefSeq_coding	6499	chr13	-	28959687	29069265		GCTTGCATTTGGGAAGGGAATGGAGAAAGGAAAGAACCAATAAAGCTTTCAAAGTTCAAG	2321	Hs.594454	GO:0005524|GO:0019838|GO:0042802|GO:0000166|GO:0004872|GO:0016740|GO:0004714|GO:0005021|GO:0000186|GO:0030154|GO:0007565|GO:0030522|GO:0007275|GO:0001569|GO:0030335|GO:0008284|GO:0048661|GO:0030949|GO:0006940|GO:0001666|GO:0002040|GO:0007169|GO:0048010|GO:0048010|GO:0005794|GO:0005737|GO:0005576|GO:0005615|GO:0005887|GO:0005730|GO:0005634|GO:0005886|GO:0005886|GO:0005886	NP_002010	Fms-related tyrosine kinase 1 (vascular endothelial growth factor/vascular permeability factor receptor)
ASHG19A3A037626	0.0243362	3.34223	up	317.917	72.0936	7.79713	6.05631	24.2902	632.72	500.874	68.4274	72.5813	98.7673	96.4017	75.5765	468.292	142.769	87.2703	5.42661	9.14003	8.97039	6.06096	6.4153	6.04773	6.33097	6.50183	9.0271	6.9016	6.24179	coding	NM_152573	RASEF	RefSeq_coding	2770	chr9	-	85597316	85678043		TTCTGTGAAACAAGTGCCAAAGATGGTTCTAACATAGTGGAGGCTGTTCTGCACCTTGCT	158158	Hs.657750	GO:0005525|GO:0005509|GO:0000166|GO:0015031|GO:0007264|GO:0005737|GO:0048471	NP_689786	RAS and EF-hand domain containing
ASHG19A3A033982	0.0398372	1.53341	up	386.614	304.861	8.53157	7.91482	81.9681	397.507	379.817	312.429	119.265	538.641	472.002	287.187	307.502	545.718	401.955	7.1762	8.46259	8.58575	8.19258	7.33471	8.35214	8.51849	8.52109	8.43555	8.79268	8.39173	coding	NM_005738	ARL4A	RefSeq_coding	3162	chr7	+	12726960	12730556		TCCCTGCGTAGAAACGCCTGCCAATGCTTTCTCATTTGGACCCAGACTCCAGATCGGGAG	10124	Hs.245540	GO:0005525|GO:0000166|GO:0005515|GO:0050873|GO:0007264|GO:0005737|GO:0005622|GO:0005730|GO:0005634|GO:0005886	NP_997625	ADP-ribosylation factor-like 4A
ASHG19A3A013951	0.0446533	2.04324	up	59.8352	25.0976	5.60613	4.57527	12.3634	32.3009	32.6881	39.0424	31.9867	22.561	19.5346	28.0984	91.7386	134.425	39.7598	4.44862	4.87734	5.07954	5.28335	4.6703	4.18185	4.29224	5.02753	6.70841	6.81225	5.13173	coding	NM_000542	SFTPB	RefSeq_coding	3681	chr2	-	85884440	85895864		ACCCATTCCTGTGTAATACAATGTCTGCACCAATGCTAATAAAGTCCTATTCTCTTTTAT	6439	Hs.512690	GO:0071260|GO:0071732|GO:0007623|GO:0006629|GO:0009887|GO:0007585|GO:0070849|GO:0051384|GO:0009749|GO:0055093|GO:0001666|GO:0070741|GO:0032496|GO:0033189|GO:0006665|GO:0005737|GO:0005576|GO:0005615|GO:0042599|GO:0005764|GO:0005771	NP_942140	Surfactant protein B
ASHG19A3A037964	0.0254724	1.5014	up	18.0077	11.8719	4.11312	3.52681	9.0666	24.8634	16.7563	13.937	18.1103	12.3246	5.92082	17.5116	11.4583	15.4948	21.9618	4.00974	4.51368	4.0548	3.83393	3.41779	3.43309	2.93951	4.32158	3.73799	3.7765	4.27414	coding	NM_198188	ASTN2	RefSeq_coding	1799	chr9	-	119187506	119449513	NM_198187,	CTGGCCCCAAGCGCGCGGGGCAAGGCGGCCCTGCAGGGGTGAGCTTTCCTCTGAGAACCC	23245	Hs.601562	GO:0016021|GO:0016020	NP_937831	Astrotactin 2
ASHG19A3A046922	0.0294571	1.61036	up	54.2837	34.968	5.73776	5.05038	23.8589	53.4135	41.1823	55.8748	31.9034	23.9124	39.2906	55.8127	53.4424	57.4678	64.3835	5.40351	5.57823	5.42073	5.77667	4.66408	4.2524	5.15524	6.05425	5.94119	5.6211	5.81109	coding	NM_000051	ATM	RefSeq_coding	13147	chr11	+	108093558	108239826		TCCTGGAGAAGAGTACCCCTTGCCAATGGAAGATGTTCTTGAACTTCTGAAACCACTATC	472	Hs.367437	GO:0016303|GO:0005524|GO:0003677|GO:0004677|GO:0042802|GO:0016301|GO:0016301|GO:0000166|GO:0016773|GO:0047485|GO:0005515|GO:0032403|GO:0046983|GO:0004674|GO:0004674|GO:0006975|GO:0006977|GO:0008630|GO:0006281|GO:0031572|GO:0007420|GO:0007049|GO:0007050|GO:0000075|GO:0008219|GO:0071480|GO:0006302|GO:0000724|GO:0007292|GO:0007507|GO:0071044|GO:0042159|GO:0007094|GO:0030889|GO:0043066|GO:0018105|GO:…	NP_000042	Ataxia telangiectasia mutated
ASHG19A3A003147	0.0236119	1.81536	up	1002.25	517.775	9.74584	8.88559	229.729	992.144	1020.99	696.386	278.096	629.902	754.762	516.809	355.42	1518.04	1610.09	8.63852	9.8093	9.99127	9.31143	8.72948	8.58359	9.16493	9.41769	8.64366	10.2629	10.3503	coding	NM_001163079	CECR6	RefSeq_coding	3979	chr22	-	17597188	17602257		CGGATCTCGCCGCCGCCCGGCCCAGGTGGTGCTGATCCTGGGCACGTCCATCCTAGACCT	27439	Hs.209577		NP_114096	Cat eye syndrome chromosome region, candidate 6
ASHG19A3A006058	0.0198201	2.42528	up	18.2725	9.03264	4.03898	2.76083	5	20.5058	12.0636	5	25.1632	5	5	12.164	31.8318	22.6867	10.3829	2.53526	4.24601	3.53815	2.3662	4.14628	2.36492	2.3915	3.77998	5.20431	4.32091	3.14452	coding	NM_147130	NCR3	RefSeq_coding	1054	chr6	-	31556659	31560762		AGCACCGTCTATTACCAGGGCAAATGTCTGACCTGGAAAGGTCCAAGAAGGCAGCTGCCG	259197	Hs.509513	GO:0004872|GO:0008037|GO:0006955|GO:0006954|GO:0045954|GO:0005887|GO:0005886	NP_667341	Natural cytotoxicity triggering receptor 3
ASHG19A3A049605	0.0398761	1.97695	up	35.9385	18.0101	5.05877	4.0755	19.5864	40.3472	25.4017	23.9057	25.4866	15.9927	5.07914	28.1113	20.3691	59.7321	41.6695	5.12116	5.18667	4.69817	4.60468	4.17172	3.76067	2.71926	5.02823	4.56241	5.67886	5.19829	coding	NM_002590	PCDH8	RefSeq_coding	4076	chr13	-	53418110	53422774		ACTGGGGAAAGCGCCTGTCACTTCGAGGGGCAGCAGCGGCTCCGCGGCGCGCACGCCGAG	5100	Hs.19492	GO:0005509|GO:0007155|GO:0007267|GO:0007156|GO:0016331|GO:0001756|GO:0030054|GO:0042995|GO:0030425|GO:0005887|GO:0005886|GO:0045211|GO:0042734|GO:0045202	NP_116567	Protocadherin 8
ASHG19A3A016875	0.0317253	1.85675	up	26.5003	15.4805	4.69633	3.80355	9.80758	30.1705	27.622	16.6548	8.53968	15.6359	26.7645	19.6501	21.3438	28.475	31.7401	4.11807	4.77893	4.82528	4.09816	2.39213	3.73195	4.67744	4.49164	4.63034	4.63924	4.81257	coding	NM_003812	ADAM23	RefSeq_coding	3059	chr2	+	207308367	207482677		ATCGCTCTTCTCATGCACATACCAACAACTTTGCAAAGTCCGTGGTCAACCTTGTGGATT	8745	Hs.591643	GO:0005178|GO:0004222|GO:0008237|GO:0005515|GO:0008270|GO:0007155|GO:0007417|GO:0006508|GO:0005576|GO:0005887|GO:0005886	NP_003803	ADAM metallopeptidase domain 23
ASHG19A3A011117	0.0115332	2.05011	up	634.405	347.81	9.26417	8.22847	192.88	613.418	794.477	657.739	129.3	380.085	379.045	720.734	497.285	536.649	643.867	8.3858	9.09408	9.62993	9.22257	7.46438	7.86495	8.20463	9.92215	9.11304	8.77074	9.05507	coding	NM_000068	CACNA1A	RefSeq_coding	8641	chr19	-	13317255	13617274		ATCAGCCTGTTGTTTCTCCTTTTCCTGTTCATTGTCGTCTTCGCCCTTTTGGGAATGCAA	773	Hs.501632	GO:0005516|GO:0008331|GO:0005515|GO:0019905|GO:0005245|GO:0005245|GO:0005244|GO:0007628|GO:0048266|GO:0048791|GO:0008219|GO:0016049|GO:0030644|GO:0021702|GO:0021680|GO:0021679|GO:0021590|GO:0048813|GO:0007204|GO:0006112|GO:0014051|GO:0007214|GO:0006006|GO:0042445|GO:0006811|GO:0051899|GO:0050883|GO:0032353|GO:0043524|GO:0050885|GO:0007274|GO:0042133|GO:0043113|GO:0014056|GO:0050770|GO:0051925|GO:…	NP_075461	Calcium channel, voltage-dependent, P/Q type, alpha 1A subunit
ASHG19A3A005725	0.0333229	1.62406	up	260.199	143.644	7.78913	7.08953	64.8676	250.306	164.444	155.33	109.844	196.436	191.742	140.453	122.501	494.494	388.998	6.83683	7.79112	7.3987	7.20644	7.18787	6.94825	7.26823	7.43722	7.11757	8.64366	8.34649	coding	NM_080594	RNPS1	RefSeq_coding	1963	chr16	-	2303120	2318114		AAAGCAGGAGGAGGTGGCGGCGGCGGGAAGATGCTGCTCTTTGGCGTAAATTGCAATCGA	10921	Hs.355643	GO:0003723|GO:0000166|GO:0005515|GO:0008380|GO:0010467|GO:0031124|GO:0006406|GO:0000398|GO:0000184|GO:0006369|GO:0006366|GO:0005737|GO:0005829|GO:0016607|GO:0005654|GO:0005634	NP_542161	RNA binding protein S1, serine-rich domain
ASHG19A3A045810	0.045523	2.13173	up	34.5757	17.4512	5.0552	3.96318	17.5638	19.6694	43.925	33.8167	16.1419	8.06457	11.6692	33.0964	36.1779	28.4562	46.1291	4.96573	4.18652	5.51292	5.08455	3.14994	2.93058	3.68508	5.27245	5.38524	4.6381	5.33596	coding	NM_024769	ASAM	RefSeq_coding	2645	chr11	-	122943034	123066007		TCTTCACTCCTTTTTCTTTCCAAACAGGGAAAAGTGTTCCACGAAGCGGTAGCGCCTTTT	79827	Hs.591949	GO:0030054|GO:0016021|GO:0005624|GO:0005886|GO:0005923	NP_079045	Adipocyte-specific adhesion molecule
ASHG19A3A037891	0.0443754	2.00284	up	17.8759	8.51507	4.01789	3.01584	5	12.0251	7.35038	8.75365	5	9.69891	14.1228	22.7477	23.5474	20.539	21.046	2.53526	3.46035	2.77267	3.17815	2.32188	3.13603	3.90788	4.70765	4.77226	4.1839	4.2105	coding	NM_001003936	TXNDC8	RefSeq_coding	501	chr9	-	113065867	113100125		AAGCCTCAACATTTTCGCAGCACTTGAATCAATAAATGTTTCACCTTTGTGCATTTGTGA	255220	Hs.147064	GO:0009055|GO:0015035|GO:0030154|GO:0045454|GO:0006662|GO:0007275|GO:0007283|GO:0005794|GO:0005737	NP_001003936	Thioredoxin domain containing 8 (spermatozoa)
ASHG19A3A011268	0.0193822	2.28332	up	167.735	71.2795	7.289	6.09786	117.422	144.65	105.769	66.8548	49.2808	59.9151	62.925	117.96	203.92	271.15	162.959	7.676	6.9866	6.78231	6.03152	5.61625	5.39926	5.7663	7.17546	7.86015	7.81243	7.11703	coding	NM_001039884	ZNF826	RefSeq_coding	4750	chr19	-	20574520	20607762		CTCCAGAAATAACACTCCGGAGTACAACAATAAAAGCCTTCTCAAAACAGAAAACAAATA
ASHG19A3A043208	0.0149193	1.94533	up	27.0821	17.2258	4.74539	3.78537	5	26.7157	27.381	23.3873	19.4683	20.5379	17.7354	23.2182	25.6806	31.2035	28.2937	2.53526	4.61049	4.81314	4.57154	3.57881	4.06836	4.17289	4.74026	4.89833	4.76737	4.64274	coding	NM_016112	PKD2L1	RefSeq_coding	3060	chr10	-	102047902	102090243		AACACGTATGCAGACTTTGAGTTCCTCGCCTTCTGGCAGACACAGTACAACAACATGAAT	9033	Hs.159241	GO:0005227|GO:0005509|GO:0008092|GO:0005515|GO:0006812|GO:0007165|GO:0005783|GO:0016021|GO:0005886	NP_057196	Polycystic kidney disease 2-like 1
ASHG19A3A011397	0.0180197	1.59396	up	50.6638	32.2375	5.62705	4.95444	27.6429	66.8989	53.1352	40.6091	26.8888	40.7072	25.3394	37.2025	45.3645	48.5844	52.7974	5.61041	5.89527	5.78545	5.3416	4.29434	4.91269	4.61316	5.45227	5.70871	5.39017	5.53045	coding	NM_001037232	ZNF829	RefSeq_coding	5056	chr19	-	37379026	37407193		TTTCCCAGAGGGCCTGGTGGCCTGCCACTTTTCTCGCAGGAATTCGAACGTTTCGTCACT	374899	Hs.720312	GO:0003677|GO:0046872|GO:0008270|GO:0006355|GO:0005622|GO:0005634	NP_001165450	Zinc finger protein 829
ASHG19A3A028920	0.0199182	2.11741	up	175.566	69.4728	7.13924	6.05694	34.7282	126.337	110.192	59.1787	66.4046	78.831	108.221	66.2928	177.086	451.91	121.578	5.94107	6.79582	6.84044	5.85964	6.24052	5.75723	6.48624	6.30543	7.65443	8.51849	6.72085	coding	NM_018936	PCDHB2	RefSeq_coding	2733	chr5	+	140474236	140476962		GAGGTGTCTCCTTTTATTAGAAAGTAACCATCTTATTCCAATTCTATGCATGTTACTGGT	56133	Hs.533023	GO:0005509|GO:0016339|GO:0007155|GO:0007156|GO:0007399|GO:0007416|GO:0007268|GO:0016021|GO:0005887|GO:0005886	NP_061759	Protocadherin beta 2
ASHG19A3A018846	0.0428121	1.79176	up	21.9687	12.9771	4.41281	3.57143	11.5685	20.9776	14.9153	12.1997	11.2931	22.1807	7.64356	26.171	22.4957	18.1817	29.0707	4.35019	4.27683	3.8767	3.64221	2.49966	4.16323	3.20187	4.91747	4.70597	4.01349	4.68638	coding	NM_001048183	PHACTR4	RefSeq_coding	6225	chr1	+	28696092	28826880		ATTTTGTTCAGCTTGCCGGGCAACCGGCCCCTGCTGGGGACTACAAGTCCCGTAAGCCTC	65979	Hs.225641	GO:0003779|GO:0004864	NP_076412	Phosphatase and actin regulator 4
ASHG19A3A050931	0.0194697	1.82904	up	18.9178	11.1713	4.19783	3.32675	7.5351	17.3318	16.7806	10.0359	18.3896	14.8958	5	22.4365	22.359	12.3824	22.2167	3.76086	4.00019	4.05757	3.35935	3.45145	3.67058	2.3915	4.68913	4.69756	3.45205	4.2905	coding	NM_033141	MAP3K9	RefSeq_coding	5602	chr14	-	71194855	71275888		TGTGCAGATTGCCAGAGGGATGAACTACTTACATGATGAGGCAATTGTTCCCATCATCCA	4293	Hs.593542	GO:0005524|GO:0004706|GO:0004708|GO:0000166|GO:0042803|GO:0004674|GO:0016740|GO:0007257|GO:0046777|GO:0006468|GO:0006468|GO:0005575	NP_149132	Mitogen-activated protein kinase kinase kinase 9
ASHG19A3A042155	0.0101438	1.58598	up	10.6182	7.61559	3.36434	2.69896	5	9.45254	14.3728	5	17.1983	5	5.87967	10.1238	8.70997	10.8551	10.1947	2.53526	3.11399	3.82126	2.3662	3.29683	2.36492	2.93161	3.53126	3.35007	3.25492	3.11452	coding	NM_201545	LGALS8	RefSeq_coding	2815	chr1	+	236681564	236712996		GAAGAGGTAGAAGACACCGTCCATGACACTTCCTGGGGAAGCAGATGTATGTATAAGGAT	3964	Hs.4082	GO:0005529|GO:0005737|GO:0005615	NP_963839	Lectin, galactoside-binding, soluble, 8
ASHG19A3A048119	0.0140731	1.82737	up	15.4371	8.57076	3.8946	3.02484	5	16.3581	10.6843	13.1701	5	13.7598	5.9239	14.3304	14.8992	16.2763	20.074	2.53526	3.92044	3.33339	3.74994	2.32188	3.57671	2.94039	4.01637	4.11191	3.84409	4.14141	coding	NM_001014336	IL31	RefSeq_coding	904	chr12	-	122656577	122658746		TGTCAATGCTCCCTGGGGGAGCCCTCGGAATCTATTTAATAAATTATATTGAATTTTTCT	386653	Hs.569071	GO:0005125|GO:0005576|GO:0005615	NP_001014358	Interleukin 31
ASHG19A3A027358	0.0360213	1.51739	up	29.1297	19.3785	4.80875	4.20715	8.27181	17.614	32.8436	21.141	29.9066	18.601	18.9719	30.8857	25.2514	25.0277	43.156	3.88359	4.02484	5.08822	4.43464	4.52245	3.94102	4.25407	5.16337	4.87322	4.45765	5.2452	coding	NM_133372	FNIP1	RefSeq_coding	6655	chr5	-	130977406	131132756		GGCGGGCATTCTCTGAGCAGGGTCCGCTCCGCCTGATCAGGAGCGCCTCTTTCTTTGCAG	96459	Hs.591273	GO:0005515|GO:0001932|GO:0005737	NP_588613	Folliculin interacting protein 1
ASHG19A3A010404	0.0443187	1.80503	up	15.5942	9.75291	3.91113	3.0591	5	11.897	18.6385	6.21836	7.60738	13.3974	16.5414	14.5609	21.5609	14.12	12.7878	2.53526	3.44497	4.21851	2.75234	2.37697	3.54113	4.08981	4.04234	4.64745	3.6429	3.4706	coding	NM_014643	ZNF516	RefSeq_coding	8626	chr18	-	74069643	74207146		ACACTTTTAGCTGAGAGTACCAGCATCCAACTGGGAGCGTTGTCATTGCATTTCCACATT	9658	Hs.436973	GO:0003677|GO:0046872|GO:0008270|GO:0005622|GO:0005634	NP_055458	Zinc finger protein 516
ASHG19A3A051889	0.0157888	1.87967	up	18.8429	10.9987	4.17122	3.26074	7.31096	25.5019	17.4639	12.7116	12.3674	17.6035	5	12.175	14.5953	19.4179	23.9034	3.71792	4.54607	4.11737	3.70053	2.61669	3.87706	2.3915	3.78138	4.08278	4.10196	4.39776	coding	NM_207355	POTEB	RefSeq_coding	2132	chr15	-	21040700	21071977	NM_174981,NM_001137671,	GAAGTAGTACAACTCCTGCTGGACAGACGATGTCAACTTAACGTCCTTGACAACAAAAAA	339010	Hs.442712		NP_997238	POTE ankyrin domain family, member B
ASHG19A3A018262	0.0194725	1.89774	up	1253.08	591.258	10.1528	9.22848	465.108	1702.79	780.682	456.615	740.809	641.92	651.84	688.17	982.041	1531.37	1833.41	9.608	10.5832	9.60605	8.72069	10.2345	8.6068	8.97235	9.84951	10.0762	10.273	10.5286	coding	NM_003116	SPAG4	RefSeq_coding	1452	chr20	+	34203808	34208965		TTCCTTGGGGAAATTCACCTTCGATGTTGAGAAATCGGAGATTCAGACTTTCCACCTGCA	6676	Hs.123159	GO:0042802|GO:0005198|GO:0007283|GO:0005929|GO:0005737|GO:0005856|GO:0035086|GO:0019861|GO:0016021|GO:0016020|GO:0005874	NP_003107	Sperm associated antigen 4
ASHG19A3A002210	0.0167026	1.63444	up	714.572	413.404	9.30299	8.59419	228.584	549.488	687.74	540.316	231.836	659.434	406.852	382.253	532.086	662.657	1473.21	8.6334	8.92703	9.42449	8.95491	8.43223	8.64507	8.30535	8.96238	9.20451	9.07174	10.2278	coding	NM_001130914	BTG3	RefSeq_coding	1596	chr21	-	18965969	18985268		CGCCCGGCCTCCTCCTTTTTGATTATGTATGGAGAGAAAAACAATGCATTCATTGTTGCC	10950	Hs.473420	GO:0008285|GO:0045930|GO:0005737	NP_006797	BTG family, member 3
ASHG19A3A010521	0.0367503	1.53261	up	268.328	174.363	7.98228	7.36629	125.23	259.757	324.458	261.205	97.6926	231.187	156.498	156.213	269.878	217.358	382.302	7.7647	7.85098	8.36005	7.93205	6.96922	7.17787	6.98761	7.59767	8.26539	7.49897	8.32061	coding	NM_032029	FCAMR	RefSeq_coding	1981	chr1	-	207131312	207143970	NM_001170631,	GCACCCCGACCTTCCGTTGCTAGCTCCAGCTGCTTTCCAAAATACCACCTTGACTTCTCA	83953	Hs.145519	GO:0004872|GO:0016021|GO:0005886	NP_114418	Fc receptor, IgA, IgM, high affinity
ASHG19A3A031790	0.00342259	1.72194	up	1320.95	809.836	10.2625	9.47845	450.339	1487.94	1337.75	780.151	303.273	1361.97	1153.45	739.4	1058.59	2113.31	1188.73	9.56698	10.3806	10.3643	9.46707	8.86986	9.72222	9.76615	9.96392	10.1904	10.7397	9.93593	coding	NM_002526	NT5E	RefSeq_coding	4087	chr6	+	86159301	86205496		ATTGCACTGGGACATTCGGGTTTTGAAATGGATAAACTCATCGCTCAGAAAGTGAGGGGT	4907	Hs.153952	GO:0008253|GO:0008198|GO:0016788|GO:0046872|GO:0000166|GO:0006196|GO:0006259|GO:0046086|GO:0050728|GO:0055086|GO:0006144|GO:0006164|GO:0006195|GO:0006206|GO:0046135|GO:0031225|GO:0005737|GO:0005624|GO:0005886|GO:0005886	NP_002517	5'-nucleotidase, ecto (CD73)
ASHG19A3A002331	0.00545211	1.96499	up	13.2725	7.75278	3.65968	2.68515	5	15.49	18.6878	7.38324	16.3807	5	5	9.29408	15.2176	8.60331	12.3419	2.53526	3.83634	4.22282	2.95593	3.17815	2.36492	2.3915	3.40897	4.14297	2.92847	3.41848	coding	NM_001135638	PIP5K1A	RefSeq_coding	3824	chr1	+	151171020	151222006		AATCAAGAGACCCATGGCATCTGAGGTCTTGGAAGCTAGACAGGATTCTTACATCTCATT	8394	Hs.655131	GO:0016308|GO:0016308|GO:0005524|GO:0016301|GO:0019900|GO:0000166|GO:0005515|GO:0016740|GO:0016477|GO:0006650|GO:0008654|GO:0016310|GO:0007165|GO:0005794|GO:0005795|GO:0005737|GO:0012505|GO:0030027|GO:0005847|GO:0016607|GO:0005730|GO:0005634|GO:0005886	NP_003548	Phosphatidylinositol-4-phosphate 5-kinase, type I, alpha
ASHG19A3A011678	0.00752242	6.89786	up	79848.3	20124.8	16.1617	13.3756	10740.1	61951.8	121601	20087.8	700.819	54193.6	14901.5	57758.6	55449	69731.6	112598	13.8573	15.8241	16.8231	14.0868	10.1401	15.3899	13.4037	16.2945	15.7315	15.8426	16.4546	coding	NM_033142	CGB7	RefSeq_coding	880	chr19	-	49557531	49558997	NM_033378,NM_033377,NM_033183,NM_033043,NM_000894,NM_000737,	GGCTGCCCCGTGTGCATCACCGTCAACACCACCATCTGTGCCGGCTACTGCCCCACCATG	94027	Hs.681647		NP_149133	Chorionic gonadotropin, beta polypeptide 7
ASHG19A3A025455	0.0379519	1.99112	up	64.4397	43.8395	5.89487	4.90129	8.08006	92.9185	69.5928	21.5313	32.7571	115.02	41.8097	36.6157	36.0734	85.7643	65.6736	3.8513	6.3603	6.17122	4.4579	4.72278	6.24094	5.23352	5.42594	5.38137	6.18905	5.84135	coding	NM_001112717	LIMCH1	RefSeq_coding	6104	chr4	+	41362803	41702059	NM_014988,	AAACAGCTGCACATCCTACAGCGGAACGACACTAAACCTGAAGGAGTTTGAAGGATTGTT	22998	Hs.335163	GO:0003779|GO:0046872|GO:0008270|GO:0031032	NP_055803	LIM and calponin homology domains 1
ASHG19A3A024481	0.046255	1.90417	up	124.317	79.2773	6.83958	5.91042	15.6826	201.319	90.3473	73.1741	45.4387	121.748	140.343	82.5059	145.93	149.019	76.783	4.79441	7.46427	6.55653	6.15189	5.44465	6.31809	6.84308	6.63435	7.36362	6.96219	6.05652	coding	NM_001015045	FAM13A	RefSeq_coding	4919	chr4	-	89647105	89744402		GTGAGATTCCCTTGCAAATTTACATACGAGAATGGCTTGTGAAATCATGCCTCTGCAAAG	10144	Hs.97270	GO:0005096|GO:0051056|GO:0007165|GO:0007264|GO:0005829|GO:0005622	NP_055698	Family with sequence similarity 13, member A
ASHG19A3A044764	0.00910584	2.15452	up	254.498	107.103	7.87035	6.76299	92.9535	161.38	434.115	124.787	89.7538	133.515	94.5078	235.385	210.192	166.259	319.66	7.3572	7.14688	8.77004	6.89905	6.81275	6.44036	6.30557	8.21894	7.90294	7.11648	8.06683	coding	NM_001142946	C11orf21	RefSeq_coding	2262	chr11	-	2317506	2323143		CCCTGGAGCTGGTGAGGCGGGCCTGGAGCACCACCCGCTTCTGGGACACCTCTTCATCAG	29125	Hs.559181	GO:0005737	NP_001136418	Chromosome 11 open reading frame 21
ASHG19A3A035760	0.0281872	1.58189	up	153.136	108.719	7.18907	6.52742	50.163	157.453	171.539	152.559	51.1027	187.641	102.129	94.4347	141.027	153.51	200.853	6.47246	7.11037	7.45587	7.1816	5.6897	6.88708	6.40627	6.83964	7.31772	7.00305	7.40778	coding	NM_000912	OPRK1	RefSeq_coding	4959	chr8	-	54138275	54164194		ATCATCAATATCTGCATCTGGCTGCTGTCGTCATCTGTTGGCATCTCTGCAATAGTCCTT	4986	Hs.106795	GO:0004930|GO:0004987|GO:0005515|GO:0004872|GO:0007610|GO:0006955|GO:0007193|GO:0007600|GO:0007268|GO:0019079|GO:0005887|GO:0005886|GO:0005886	NP_000903	Opioid receptor, kappa 1
ASHG19A3A030392	0.0493217	1.78368	up	64.8122	43.6684	6.00078	5.16593	23.2793	70.5008	62.0105	55.6048	19.5372	61.0547	58.8658	59.9245	61.8186	67.1642	67.4548	5.3681	5.96765	6.00526	5.77094	3.58727	5.42336	5.67996	6.15678	6.15402	5.84233	5.87866	coding	NM_001164282	TRAF3IP2	RefSeq_coding	1137	chr6	-	111880144	111894898		TTACTAACATATCTGAGCTGTGCTTTGGTCTACTCCAAACTTGCTGGCCTTTCTGCAAAA	10758	Hs.561514	GO:0035556|GO:0043123|GO:0005575	NP_679211	TRAF3 interacting protein 2
ASHG19A3A004669	0.0329832	2.79061	up	83.6566	39.8089	6.26844	4.78785	14.0018	96.4152	99.0859	82.994	12.92	51.7499	37.3789	32.7179	82.5267	83.8553	107.339	4.62941	6.41111	6.68861	6.32555	2.68076	5.21097	5.09257	5.25331	6.56629	6.15803	6.53326	coding	NM_013281	FLRT3	RefSeq_coding	3773	chr20	-	14304642	14318260		TAGGATTGCTTTTTCTCGTCTTCCTGGGTTCTGAAGTAACGGAAGCTACCTTGTATAAAG	23767	Hs.41296	GO:0030674|GO:0005057|GO:0008150|GO:0007155|GO:0005887|GO:0016020|GO:0005578	NP_938205	Fibronectin leucine rich transmembrane protein 3
ASHG19A3A037188	0.0254349	1.85849	up	38.8523	22.1871	5.18708	4.29294	8.59291	55.7142	33.9633	23.5153	20.2825	26.715	31.83	28.8777	56.5284	35.8382	22.1918	3.93553	5.6416	5.1382	4.57883	3.6741	4.38652	4.88975	5.06709	6.02632	4.96055	4.28872	coding	NM_006900	IFNA13	RefSeq_coding	705	chr9	-	21367370	21368075	NM_024013,	TAAGGAGGAAGGAATAACACCTGGTCCAACATGAAACAATTCTTATTGACTCATATACCA	3447	Hs.533471	GO:0005125|GO:0005132|GO:0007596|GO:0019221|GO:0006952|GO:0060338|GO:0009615|GO:0060337|GO:0005576|GO:0005576|GO:0005615	NP_008831	Interferon, alpha 13
ASHG19A3A002009	0.0334805	1.54685	up	2457.37	1642.93	11.1465	10.5172	814.335	2545.8	2045.84	1924.44	875.162	1408.73	3191.99	1324.32	1872.64	3969.79	2985.83	10.3786	11.1626	10.9516	10.7405	10.4865	9.77287	11.2076	10.8617	10.9807	11.6861	11.2365	coding	NM_001127397	ERLEC1	RefSeq_coding	3043	chr2	+	54014067	54046495		TTCAAGACGATGGTACCCAGACAGTCAGGTGCAAAGAATCAGATTCACCTCATGCTGTTA	27248	Hs.438336	GO:0001948|GO:0005515|GO:0030433|GO:0005783|GO:0005788	NP_056516	Endoplasmic reticulum lectin 1
ASHG19A3A014938	0.0112596	1.8304	up	18.2933	11.725	4.16865	3.2965	5	14.5097	17.686	12.749	14.1038	13.5986	13.1737	20.3366	20.3218	16.5861	20.3196	2.53526	3.74137	4.13779	3.70562	2.85736	3.56043	3.82382	4.54226	4.55847	3.87101	4.16102	coding	NM_001099334	C2orf80	RefSeq_coding	1229	chr2	-	209030080	209054773		ACTATGACTTGGCCATCAGTGTTGCTTTGCAATGGCTGGATCCCTCAGAAGACTTAACTT	389073	Hs.198416		NP_001092804	Chromosome 2 open reading frame 80
ASHG19A3A048092	0.00594186	1.91412	up	22.0786	13.7019	4.42453	3.48785	5	19.3709	16.8574	12.2052	19.3239	21.0709	10.9094	18.444	22.8742	26.5936	28.3315	2.53526	4.16418	4.06489	3.64277	3.55933	4.10234	3.59955	4.39718	4.73081	4.54514	4.645	coding	NM_002859	PXN	RefSeq_coding	3691	chr12	-	120648249	120703563	NM_001080855,	GGGACGGGCAGCTAGCGCGACCCTGAGCCGGCGCCCGTGGTCCGGCCATGGACGACCTCG	5829	Hs.446336	GO:0051435|GO:0008013|GO:0046872|GO:0005515|GO:0017166|GO:0008270|GO:0000187|GO:0048754|GO:0007155|GO:0034329|GO:0006928|GO:0034614|GO:0007010|GO:0007173|GO:0048041|GO:0030032|GO:0006936|GO:0018108|GO:0007172|GO:0007165|GO:0030054|GO:0005737|GO:0005856|GO:0005925|GO:0030027|GO:0005875|GO:0005886|GO:0005886|GO:0005886	NP_079433	Paxillin
ASHG19A3A016197	0.0345429	1.82208	up	16.3599	9.91374	3.94858	3.08299	5	14.3117	10.6855	8.69545	5	23.6005	7.2727	14.1095	14.1308	19.7489	25.1731	2.53526	3.71945	3.33421	3.16999	2.32188	4.23589	3.15193	3.99593	4.03773	4.12826	4.4759	coding	NM_153214	FBLN7	RefSeq_coding	2329	chr2	+	112895961	112945791		ACTGCAGCTGCGAGGCCGGATTCCACCTGAGCGGCGCCGCCGGCGACAGCGTCTGCCAGG	129804	Hs.437696	GO:0005509|GO:0008201|GO:0007155|GO:0005576|GO:0005578	NP_694946	Fibulin 7
ASHG19A3A002324	0.024944	2.29868	up	37.1425	21.9157	5.1289	3.9281	5	47.6599	38.6401	14.6221	19.0565	45.2853	25.6145	17.3532	41.4836	44.2999	33.418	2.53526	5.41433	5.32526	3.90605	3.53067	5.04181	4.62671	4.30751	5.58143	5.26169	4.88321	coding	NM_001135565	HDHD1A	RefSeq_coding	2224	chrX	-	6966960	7066231		TTTGACATGGACGGACTTCTTCTGGGTTATACAGGAAGCATAGTGGCAGCTGCTTCGGGG	8226	Hs.185910	GO:0016787|GO:0046872|GO:0003674|GO:0016791|GO:0008150|GO:0009117|GO:0005575	NP_036212	Haloacid dehalogenase-like hydrolase domain containing 1
ASHG19A3A004124	0.013397	1.76568	up	17.0591	11.123	4.03338	3.21315	5	23.939	11.8119	10.795	13.5813	16.1044	10.1345	14.8068	18.1732	16.5731	17.0505	2.53526	4.459	3.49766	3.46884	2.78019	3.76977	3.5117	4.06536	4.39709	3.87035	3.91081	coding	NM_003277	CLDN5	RefSeq_coding	1720	chr22	-	19510546	19512860		GAGCAGCCCCTGTGAAGATTGAGAGCTGCCAGAGGCTCTGTGATTGGCTGCGGCACGATG	7122	Hs.505337	GO:0042802|GO:0005198|GO:0016338|GO:0005911|GO:0016021|GO:0005886|GO:0005923	NP_003268	Claudin 5
ASHG19A3A027025	0.0197079	1.71854	up	24.1777	14.2216	4.54099	3.7598	8.75804	23.5053	27.362	20.8216	20.2465	7.92098	13.361	25.7877	12.68	29.9095	25.8216	3.9636	4.43451	4.81169	4.41151	3.66984	2.91279	3.84128	4.89464	3.88319	4.70865	4.51325	coding	NM_001004441	ANKRD34B	RefSeq_coding	3952	chr5	-	79852574	79866304		TTCAGAATAGACCTCTGAGTTGGGACCCAAGCTGTCAACTGATCCCAAATTCCTAAGTTC	340120	Hs.519404	GO:0005737|GO:0005634	NP_001004441	Ankyrin repeat domain 34B
ASHG19A3A011677	0.00144316	10.3081	up	14954.9	2527.5	13.693	10.3273	826.855	12410.5	23174.1	2474.82	143.728	7688.51	1503.6	5959.08	8535.79	17984.1	21666.1	10.4031	13.4869	14.5017	11.1021	7.64225	12.3579	10.1313	13.0666	13.1174	13.8887	14.0969	coding	NM_033183	CGB8	RefSeq_coding	904	chr19	-	49550895	49552368	NM_033043,NM_000737,	AACCCCGAGGTTTAAAGCCAGGTACACGAGGCAGGGGACACACCAAGGATGGAGATGTTC	1082	Hs.706408	GO:0005179|GO:0006915|GO:0007267|GO:0034641|GO:0007292|GO:0042446|GO:0016486|GO:0007165|GO:0005576|GO:0005625	NP_000728	Chorionic gonadotropin, beta polypeptide
ASHG19A3A053488	0.0139862	1.65047	up	743.556	452.205	9.42362	8.70075	161.996	740.967	815.775	616.72	337.28	665.556	479.471	502.247	374.847	955.93	1071.57	8.12454	9.38477	9.67211	9.14078	9.03505	8.66081	8.54256	9.37745	8.71897	9.60986	9.77856	coding	NM_004862	LITAF	RefSeq_coding	2642	chr16	-	11641581	11680229		ACTGCTGATGGCACCCAGCTCTGGGCCCAGACGCCGCTCACCGTCCACCGCCGGTGCTGG	9516	Hs.459940	GO:0003702|GO:0050699|GO:0004871|GO:0006915|GO:0043123|GO:0006357|GO:0007165|GO:0005794|GO:0005765|GO:0016020	NP_004853	Lipopolysaccharide-induced TNF factor
ASHG19A3A037154	0.0129914	2.53779	up	9582.02	4842.13	13.0845	11.7409	1820.71	10772	11887.1	3909.51	857.627	11807	5815.75	3174.34	7721.61	10279.1	13657.9	11.4725	13.2861	13.5288	11.747	10.4511	13.0242	12.0096	12.1799	12.9761	13.0954	13.4405	coding	NM_001122	PLIN2	RefSeq_coding	2010	chr9	-	19115759	19127573		ATGGGTAGAGTGGAAAAGGAGCATTGGATATGATGATACTGATGAGTCCCACTGTGCTGA	123	Hs.3416	GO:0044255|GO:0019915|GO:0015909|GO:0042493|GO:0014070|GO:0005737|GO:0005783|GO:0005576|GO:0005811|GO:0005634|GO:0005886	NP_001113	Perilipin 2
ASHG19A3A049874	0.0489859	1.60393	up	54.7691	35.0095	5.66875	4.98715	14.4106	64.8025	88.235	52.5566	30.9409	40.9206	36.2188	27.036	50.2183	52.6215	45.7011	4.6727	5.85093	6.52174	5.69716	4.59475	4.91917	5.05196	4.96599	5.85387	5.49746	5.32254	coding	NM_001143945	GAS6	RefSeq_coding	2188	chr13	-	114523523	114539017		AAATGCTTCTCTTTGGGGTTGGGGTTTTAGTTTCAAATGCCCCCGGGGGGTTACTTTTTA	2621	Hs.646346	GO:0005509|GO:0048018|GO:0005102|GO:0007596|GO:0008283|GO:0044267|GO:0050900|GO:0017187|GO:0030168|GO:0002576|GO:0070374|GO:0048146|GO:0043687|GO:0006508|GO:0040008|GO:0007165|GO:0005796|GO:0005788|GO:0005576|GO:0005615|GO:0031093	NP_001137418	Growth arrest-specific 6
ASHG19A3A012755	0.0294982	1.59924	up	13.3696	9.90018	3.68166	3.00427	5	10.9968	12.9734	12.5267	15.69	11.2841	5	11.7452	12.9049	20.0156	11.5821	2.53526	3.33052	3.65776	3.68049	3.08963	3.32449	2.3915	3.73105	3.90655	4.14565	3.31843	coding	NM_024327	ZNF576	RefSeq_coding	1899	chr19	+	44100543	44104587		TATACTACTGCCGGATGGCAAATCCGGGATCTCGGCTCCGAGAGGCTCATCTGGCAAAAG	79177	Hs.11110	GO:0003677|GO:0046872|GO:0008270|GO:0005622|GO:0005634	NP_077303	Zinc finger protein 576
ASHG19A3A052429	0.0459604	1.7315	up	138.376	91.1371	6.98226	6.19024	46.434	145.503	96.1521	70.6268	43.9463	219.02	75.6588	69.9143	175.242	224.731	118.716	6.35998	6.99439	6.64591	6.1061	5.37385	7.10275	6.00853	6.38374	7.63754	7.54708	6.68492	coding	NM_018948	ERRFI1	RefSeq_coding	3144	chr1	-	8071779	8086393		TTTTTAAATATTGACCCGATAACCATGGCCTACAGTCTGAACTCTTCTGCTCAGGAGCGC	54206	Hs.605445	GO:0005100|GO:0005515|GO:0019901|GO:0048286|GO:0060428|GO:0060426|GO:0007175|GO:0007175|GO:0050732|GO:0031953|GO:0045616|GO:0006950|GO:0043589|GO:0005737|GO:0031234|GO:0005634|GO:0005886	NP_061821	ERBB receptor feedback inhibitor 1
ASHG19A3A001770	0.0252037	1.73423	up	11.294	6.61649	3.40075	2.60645	5	8.88649	11.7499	10.0052	8.07723	5	5	9.9436	11.1059	6.35622	19.7217	2.53526	3.02709	3.48811	3.35575	2.38483	2.36492	2.3915	3.5068	3.69386	2.57457	4.11408	coding	NM_001100168	CCR5	RefSeq_coding	3451	chr3	+	46411632	46417690		CTGCCACCTATGTATCTGGCATAGTCTCATCTGGCCAGAAGAGCTGAGACATCCGTTCCC	1234	Hs.450802	GO:0016493|GO:0016493|GO:0004930|GO:0003779|GO:0004950|GO:0015026|GO:0004435|GO:0005515|GO:0007186|GO:0007166|GO:0007267|GO:0006968|GO:0006935|GO:0007204|GO:0030260|GO:0006955|GO:0006954|GO:0019059|GO:0044419|GO:0016032|GO:0009986|GO:0005737|GO:0005768|GO:0009897|GO:0005887|GO:0005886|GO:0005886	NP_001093638	Chemokine (C-C motif) receptor 5
ASHG19A3A030297	0.012735	1.91809	up	39.0057	23.0187	5.23674	4.29707	10.0368	42.079	52.928	31.0797	19.2005	40.5993	14.1774	24.6107	41.4694	37.5254	35.4214	4.14828	5.24245	5.77906	4.96771	3.54618	4.9091	3.9141	4.82512	5.58086	5.02593	4.96703	coding	NM_198468	C6orf167	RefSeq_coding	8643	chr6	-	97590037	97731052		TTTTTGAAGAGTCAGAGAATGTCACAGGTAGTGCCTTTCTCACAACTTGCGGATGCAGCT	253714	Hs.444292	GO:0005515|GO:0006281|GO:0000724|GO:0031297|GO:0035101|GO:0042555|GO:0043596|GO:0005634	NP_940870	MMS22-like, DNA repair protein
ASHG19A3A053752	0.0398958	1.81455	up	23.7932	13.3544	4.53602	3.67641	13.5004	18.0308	28.2322	19.976	18.9259	8.10938	6.26041	22.9154	25.1112	30.7391	17.7304	4.57499	4.06041	4.85963	4.35692	3.51586	2.93547	2.99881	4.71907	4.86492	4.74778	3.96431	coding	NM_002968	SALL1	RefSeq_coding	5143	chr16	-	51169885	51185183		TGTTTGAGCCAGCATGTCGCGGAGGAAGCAAGCGAAGCCTCAACATTTCCAATCCGACCC	6299	Hs.135787	GO:0003677|GO:0008013|GO:0004407|GO:0046872|GO:0005515|GO:0003700|GO:0016563|GO:0016564|GO:0008270|GO:0030325|GO:0001658|GO:0048566|GO:0042733|GO:0008406|GO:0007507|GO:0031129|GO:0001822|GO:0072073|GO:0060173|GO:0003337|GO:0000122|GO:0021889|GO:0061034|GO:0021553|GO:0042473|GO:0021983|GO:0030177|GO:0045944|GO:0006351|GO:0001657|GO:0072092|GO:0003281|GO:0016581|GO:0010369|GO:0005737|GO:0000792|GO:…	NP_002959	Sal-like 1 (Drosophila)
ASHG19A3A023567	0.0341891	2.22448	up	18.3481	6.35148	3.79412	2.64065	5	11.8273	10.2065	11.7574	5	5	5	8.6699	13.4478	54.9193	11.0179	2.53526	3.4374	3.25786	3.58968	2.32188	2.36492	2.3915	3.31384	3.96705	5.55671	3.23184	coding	NM_005832	KCNMB2	RefSeq_coding	2499	chr3	+	178276617	178562216		TTCTTTTCTTAATCCTATCCAAGTATGCAGTACGCTCTTGGGTCGTCTCATGAGACCCAG	10242	Hs.478368	GO:0015269|GO:0008200|GO:0015459|GO:0007596|GO:0005513|GO:0006811|GO:0030168|GO:0006813|GO:0001508|GO:0019228|GO:0019229|GO:0005887|GO:0016020|GO:0008076	NP_852006	Potassium large conductance calcium-activated channel, subfamily M, beta member 2
ASHG19A3A011804	0.0303052	1.62205	up	44.4228	28.3975	5.43338	4.73556	19.3435	31.4711	57.1838	37.419	24.3716	39.6197	21.2335	49.1047	33.8597	40.7587	54.1589	5.10423	4.83862	5.88754	5.22209	4.07731	4.88013	4.39401	5.86804	5.29436	5.14464	5.56705	coding	NM_003240	LEFTY2	RefSeq_coding	2187	chr1	-	226124297	226129083	NM_020997,	GCCGCCCAACAGCGAGCTGGTGCAGGCCGTGCTGCGGCTCTTCCAGGAGCCGGTCCCCAA	7044	Hs.520187	GO:0005125|GO:0008083|GO:0005160|GO:0007596|GO:0016049|GO:0007275|GO:0030168|GO:0002576|GO:0007179|GO:0005576|GO:0005615|GO:0031093	NP_003231	Left-right determination factor 2
ASHG19A3A002096	0.0455859	1.96845	up	73.1359	33.3606	5.92997	4.95291	13.6111	112.603	67.8626	46.2146	35.2757	31.2546	40.447	18.622	59.4538	54.4724	125.802	4.58695	6.62583	6.13503	5.52247	4.87857	4.58345	5.19311	4.4126	6.0981	5.54461	6.76367	coding	NM_001128831	CA1	RefSeq_coding	1224	chr8	-	86240457	86290342		TGGCAGCCTTCTCTCATTCAGAGCTAAAAAGAAAACTCAGTAGAAGATAATGGCAAGTCC	759	Hs.23118	GO:0004089|GO:0016829|GO:0046872|GO:0008270|GO:0006730|GO:0005794|GO:0005737	NP_001729	Carbonic anhydrase I
ASHG19A3A039557	0.0389256	1.61503	up	27.2179	16.286	4.67766	3.9861	12.309	15.9784	27.9769	22.2944	20.4275	16.2736	10.1253	20.9368	25.3315	47.0956	25.9881	4.44199	3.88393	4.8457	4.5045	3.6907	3.78272	3.51062	4.58599	4.87851	5.34885	4.52299	coding	NM_181332	NLGN4X	RefSeq_coding	5672	chrX	-	5808083	6146706		GAAAAATCTGGACGTGTAAAAAGAACTCTTAACGGCCGATGCAGCTCTTCCAAAGCTAAG	57502	Hs.21107	GO:0031404|GO:0042043|GO:0042043|GO:0005515|GO:0042803|GO:0003360|GO:0007155|GO:0045216|GO:0021549|GO:0008049|GO:0046622|GO:0060079|GO:0035176|GO:0007416|GO:0050808|GO:0050808|GO:0002124|GO:0071625|GO:0009986|GO:0030425|GO:0016021|GO:0005887|GO:0005886|GO:0045202	NP_851849	Neuroligin 4, X-linked
ASHG19A3A002436	0.0247773	1.6564	up	4288.7	2553.42	11.8771	11.149	1064.05	4039.78	3870.95	3250.96	1167.57	4198.9	3085.61	1982.35	2118.19	6496.24	7224.66	10.7466	11.8582	11.8734	11.4676	10.9196	11.4555	11.1559	11.451	11.1585	12.3985	12.523	coding	NM_001136474	VASH2	RefSeq_coding	4273	chr1	+	213123886	213164925		GAGCTCCCGCCGCCGCTCCCCCTTGGCGCCAAAGGCACCCGGTCCCGGAGCAGCCACGCG	79805	Hs.96885	GO:0045766|GO:0001938|GO:0005737	NP_079025	Vasohibin 2
ASHG19A3A004980	0.0040473	1.50498	up	28.4082	18.6925	4.80071	4.21096	13.837	26.1002	22.1151	20.1537	24.3471	21.1272	13.9974	25.0487	30.1369	33.7747	33.2737	4.61092	4.58	4.48734	4.36781	4.0746	4.10585	3.89562	4.85281	5.12916	4.87769	4.87723	coding	NM_017929	PEX26	RefSeq_coding	2510	chr22	+	18560685	18572206		TCCGCGCCCGCTGCCGGGAGGCGAGGCCAACTCGGGATATCCCGGAGCCTCTGGGGAGGC	55670	Hs.517400	GO:0008022|GO:0005515|GO:0032403|GO:0016558|GO:0045046|GO:0015031|GO:0016021|GO:0005779|GO:0016020|GO:0005778|GO:0005777	NP_060399	Peroxisomal biogenesis factor 26
ASHG19A3A050505	0.0294802	1.62764	up	5836.41	3641.28	12.3628	11.66	1484.48	6174.51	5482	4752.31	1667.98	5935.51	4366.12	3393.44	2559.62	8592.91	8815.96	11.2087	12.473	12.38	12.0315	11.4535	11.9757	11.6307	12.2676	11.4184	12.8362	12.8016	coding	NM_007274	ACOT7	RefSeq_coding	1814	chr1	-	6324332	6453826		CCTTCTGCAGCCGCCCGCCGCATCCGCCGCCGCAGCCCCCAGCATGTCGGGCCCAGACGT	11332	Hs.126137	GO:0047617|GO:0004091|GO:0003824|GO:0000062|GO:0016787|GO:0016290|GO:0009062|GO:0006629|GO:0005737|GO:0005829|GO:0005739|GO:0005730|GO:0005634	NP_863656	Acyl-CoA thioesterase 7
ASHG19A3A013732	0.00580253	1.88457	up	160.348	86.7374	7.23432	6.32008	56.5913	203.272	206.682	120.885	51.5821	129.84	74.7886	91.5725	143.116	131.282	186.164	6.64098	7.47678	7.7184	6.85357	5.70871	6.40373	5.99343	6.78929	7.33818	6.77988	7.30339	coding	NM_001004695	OR2T33	RefSeq_coding	963	chr1	-	248436154	248437116	NM_001005522,	TCCACTAACCATGACAAGGTTGTGTCAGCCTTCTATACTATGTTCACCCCTTTACTAAAC	391195	Hs.553783	GO:0004984|GO:0004872|GO:0050896|GO:0007608|GO:0016021|GO:0005886	NP_001004695	Olfactory receptor, family 2, subfamily T, member 33
ASHG19A3A013736	0.0448274	1.52338	up	116.228	72.5518	6.74381	6.13653	48.7998	135.304	136.68	109.345	55.9986	78.3186	70.2971	49.532	94.035	136.084	145.734	6.43422	6.89582	7.14424	6.71008	5.87953	5.74789	5.91093	5.88171	6.74512	6.83024	6.96572	coding	NM_001004692	OR2T12	RefSeq_coding	963	chr1	-	248457918	248458880	NM_001005522,	AAATCCCACAGGTCCACTAACCACGATAAGGTTGTGTCAGCCTTCTATACTATGTTCACC	127064	Hs.553582	GO:0004984|GO:0004872|GO:0050896|GO:0007608|GO:0016021|GO:0005886	NP_001004692	Olfactory receptor, family 2, subfamily T, member 12
ASHG19A3A050426	0.0443389	1.67507	up	11.0816	5.89756	3.29023	2.546	5	12.6337	6.76161	5	5	9.4878	5	5	11.4832	18.3138	12.297	2.53526	3.53209	2.67184	2.3662	2.32188	3.11518	2.3915	2.36059	3.74052	4.02438	3.41193	coding	NM_024626	VTCN1	RefSeq_coding	2605	chr1	-	117686209	117753549		CTGATGCTAAAATAATGTGCCTCGGCCACAAAAAAGCATGCAAAGTCATTGTTACAACAG	79679	Hs.546434	GO:0016021|GO:0005886	NP_078902	V-set domain containing T cell activation inhibitor 1
ASHG19A3A004452	0.000606121	1.54544	up	26.5925	17.8124	4.69865	4.07063	8.17205	25.1987	26.6298	16.9708	27.7402	23.7575	12.4217	21.1504	20.6413	32.8939	33.0407	3.86612	4.53055	4.77029	4.12262	4.36469	4.24379	3.75593	4.6002	4.58213	4.84086	4.86785	coding	NM_005927	MFAP3	RefSeq_coding	5049	chr5	+	153418518	153437014		CCGGAAGGAGCTAGACGGCGGTCGGGTTCTCTACTCACATCTTTTAATCTTGAAGACTAG	4238	Hs.432818	GO:0016021|GO:0005886	NP_005918	Microfibrillar-associated protein 3
ASHG19A3A051105	0.00589048	2.03101	up	26.5481	12.6021	4.63018	3.60798	7.25089	12.6506	24.3615	11.5461	20.8888	12.9919	10.3328	25.0948	30.0163	23.6037	43.5616	3.7061	3.53433	4.63252	3.56257	3.73767	3.50051	3.53306	4.85477	5.12178	4.37929	5.25839	coding	NM_177438	DICER1	RefSeq_coding	10323	chr14	-	95552564	95623759		ACGCGCGCGCCGGAGCGGGGTCCGATGGTTCTCGAAGGCCCGCGGCGCCCCGTGCTGCAG	23405	Hs.87889	GO:0005524|GO:0008026|GO:0003725|GO:0004519|GO:0004386|GO:0016787|GO:0046872|GO:0000166|GO:0005515|GO:0004525|GO:0004525|GO:0006396|GO:0031047|GO:0010626|GO:0000122|GO:0021675|GO:0048812|GO:0032290|GO:0014040|GO:0031643|GO:0031054|GO:0035196|GO:0030422|GO:0030423|GO:0016442|GO:0005737|GO:0005829|GO:0005622	NP_803187	Dicer 1, ribonuclease type III
ASHG19A3A036797	0.0180033	1.89766	up	25.7933	13.1484	4.61103	3.68681	11.5106	14.3518	22.2696	14.6021	23.3442	8.95365	7.33154	28.6302	20.4713	29.4364	39.6005	4.34111	3.72447	4.49983	3.90255	3.98227	3.04946	3.15865	5.05693	4.57123	4.6872	5.12653	coding	NM_172218	SPAG1	RefSeq_coding	3765	chr8	+	101170262	101254130		CAGTGCAGCCAGAGCCGGTGCGGCGGCCGCGACTTCCCCGACGCGGGGCGCTGAGAAGCA	6674	Hs.591866	GO:0005525|GO:0016787|GO:0000166|GO:0007338|GO:0005737	NP_757367	Sperm associated antigen 1
ASHG19A3A005898	0.0458674	1.54734	up	1764.44	1222.86	10.6627	10.0329	422.522	1597.95	1524.38	812.01	837.706	2628.25	1413.84	982.74	1535.67	3209.4	1736.49	9.4769	10.4856	10.5354	9.51911	10.4105	10.7137	10.0442	10.4245	10.7116	11.3617	10.4572	coding	NM_138822	PAM	RefSeq_coding	5098	chr5	+	102201526	102366806		GGCATTGAGGTCCAGGAAATCAAAGGAAAGGGAAGTGGAGGCTTAAACCTTGGTAATTTC	5066	Hs.369430	GO:0031418|GO:0005507|GO:0016829|GO:0046872|GO:0004598|GO:0004504|GO:0005515|GO:0009987|GO:0055114|GO:0006518|GO:0006464|GO:0005576|GO:0016021|GO:0016020|GO:0030141	NP_620177	Peptidylglycine alpha-amidating monooxygenase
ASHG19A3A028486	0.0391992	1.60169	up	249.656	190.797	7.89774	7.21814	62.989	290.385	181.15	207.757	70.8753	410.165	202.198	233.994	178.208	326.181	288.02	6.79551	8.00226	7.53355	7.61222	6.37066	7.96574	7.34659	8.20812	7.66346	8.06494	7.9141	coding	NM_002890	RASA1	RefSeq_coding	4307	chr5	+	86564150	86687732		ACCTAGTGGAGACATGGCTCTCACCAAACTGCCCACTTCGTTGCTTGCTGAGACTCTCGG	5921	Hs.664080	GO:0051020|GO:0005099|GO:0001948|GO:0019870|GO:0005515|GO:0005102|GO:0000910|GO:0009790|GO:0035556|GO:0007162|GO:0001953|GO:0043524|GO:0045768|GO:0051252|GO:0030833|GO:0008360|GO:0051056|GO:0007165|GO:0001570|GO:0005737|GO:0005829|GO:0005622	NP_072179	RAS p21 protein activator (GTPase activating protein) 1
ASHG19A3A023324	0.0341941	1.55965	up	70.5363	45.1767	6.10595	5.46473	34.9663	79.704	72.5657	74.5998	45.1843	39.0459	32.0873	65.7227	52.9783	65.5219	86.725	5.95136	6.14208	6.23144	6.17932	5.43408	4.86018	4.89872	6.29383	5.9278	5.80877	6.23181	coding	NM_001172312	PLS1	RefSeq_coding	3880	chr3	+	142375738	142432503		TAATGTAGAGCAAAAGGCTGAGAGGAAGCTCTTCTATTCTCCATCATCGGTCTTCAGTGG	5357	Hs.203637	GO:0051015|GO:0005509|GO:0005200|GO:0005737	NP_002661	Plastin 1
ASHG19A3H0000535	0.0203459	1.56481	up	19.1712	12.4605	4.20789	3.56189	6.40687	23.8307	24.6899	10.0242	24.9239	11.3054	9.64224	13.4041	20.1665	13.4381	19.4981	3.54421	4.4532	4.65339	3.35853	4.12301	3.32668	3.45705	3.92138	4.54902	3.57196	4.09835	coding	NM_006898_intron2-	NM_006898	HOX cluster	1860	chr2	-	177034383	177036244		TGGAAGCATTTTGAGTATTCACAGTGCTAGGAGCAGCAGCCTCAACACTGGCTTTTACTA
ASHG19A3A045538	0.0474606	2.11822	up	25.7263	12.9129	4.5682	3.48535	11.8856	30.8409	25.9185	20.0789	10.5753	17.0248	5	23.0116	9.79584	27.1069	37.6841	4.39347	4.80975	4.73017	4.36317	2.43931	3.83929	2.3915	4.72506	3.51514	4.57132	5.05774	coding	NM_199418	PRCP	RefSeq_coding	2224	chr11	-	82535409	82611557		CTTGCTGCTGGGCAGTTGCACATATGTATTATCCAACTAAATCATTACAAGACTCCTCTG	5547	Hs.523936	GO:0008233|GO:0005515|GO:0004185|GO:0008236|GO:0007596|GO:0007597|GO:0006508|GO:0005764|GO:0005886	NP_955450	Prolylcarboxypeptidase (angiotensinase C)
ASHG19A3A035483	0.000690029	3.82206	up	772.952	189.725	9.32969	7.39534	97.1459	971.869	746.711	145.763	143.675	428.46	133.581	243.094	584.979	528.806	1562.25	7.42012	9.77965	9.54315	7.11389	7.64196	8.031	6.76975	8.27044	9.33259	8.74593	10.3064	coding	NM_020318	PAPPA2	RefSeq_coding	6940	chr1	+	176432306	176811968		TGCAAACTTCTCCTGCTCAGAGGGAACCAAATTTCTGAAACGCTGCTCAATCTCTTGTGT	60676	Hs.187284	GO:0046872|GO:0004222|GO:0008237|GO:0008233|GO:0008270|GO:0030154|GO:0006508|GO:0001558|GO:0005576|GO:0005622|GO:0016020	NP_068755	Pappalysin 2
ASHG19A3A021918	0.00679026	1.61186	up	30.0668	18.5803	4.83412	4.14539	9.21032	41.3978	35.2944	19.2841	22.9045	21.1826	20.3204	26.2092	14.8852	29.4262	33.1878	4.03141	5.22122	5.19311	4.30719	3.9394	4.10896	4.33997	4.91988	4.11045	4.68658	4.87347	coding	NM_024947	PHC3	RefSeq_coding	12687	chr3	-	169805367	169899537		AAATTTGCAGCAGTCCACTGCTAATCAGGTGCAAGCTACAGCACAGTTGAATCTTCCATC	80012	Hs.529592	GO:0003677|GO:0046872|GO:0008270|GO:0007275|GO:0005634	NP_079223	Polyhomeotic homolog 3 (Drosophila)
ASHG19A3A003989	0.0344467	1.72014	up	23.8326	14.0475	4.49565	3.71312	9.43113	15.5098	20.9751	15.6484	16.1859	8.4937	20.4785	25.5502	15.4911	29.7878	35.6814	4.06519	3.83884	4.40381	4.00723	3.15523	2.98819	4.34977	4.88063	4.16802	4.70311	4.97949	coding	NM_145899	HMGA1	RefSeq_coding	2031	chr6	+	34204576	34214007	NM_002131,	GGCGCTGGCGCGGCTCCAAGAAGGCATCCGCATTTGCTACCAGCGGCGGCCGCGGCGGAG	3159	Hs.518805	GO:0003680|GO:0003677|GO:0019899|GO:0030374|GO:0042975|GO:0005515|GO:0042974|GO:0046965|GO:0003700|GO:0008134|GO:0006268|GO:0019059|GO:0044419|GO:0006345|GO:0006337|GO:0006461|GO:0019047|GO:0019047|GO:0006355|GO:0006351|GO:0016032|GO:0000785|GO:0005694|GO:0005829|GO:0005829|GO:0005654|GO:0005634|GO:0005667	NP_665912	High mobility group AT-hook 1
ASHG19A3A023706	0.0488208	2.01949	up	829.558	391.193	9.40932	8.39532	91.7815	1272.37	647.259	362.559	374.859	740.727	386.038	222.156	471.009	1369.52	995.034	7.33688	10.1581	9.34207	8.39767	9.19668	8.81765	8.22774	8.1335	9.03524	10.1149	9.67211	coding	NM_134470	IL1RAP	RefSeq_coding	2114	chr3	+	190231839	190348071	NM_001167930,	CTAGCCCGACGGCATCTAACCCATAGTAATGAATCAAACTTAAATGAAAAATATGAAAGT	3556	Hs.478673	GO:0004908|GO:0005515|GO:0004871|GO:0004888|GO:0019221|GO:0006955|GO:0006954|GO:0045087|GO:0042094|GO:0006461|GO:0007165|GO:0005576|GO:0005887|GO:0005886|GO:0005886	NP_608273	Interleukin 1 receptor accessory protein
ASHG19A3A048841	0.0033671	1.52603	up	41.7467	27.9695	5.30889	4.69911	12.1429	64.2282	33.8099	27.5207	30.7222	39.6567	29.8053	28.3643	31.1737	42.405	50.4991	4.42143	5.83946	5.13102	4.80035	4.58092	4.88197	4.81085	5.04294	5.17568	5.19842	5.46582	coding	NM_175624	RAB3IP	RefSeq_coding	9247	chr12	+	70132630	70216982	NM_022456,	GCTCTCTGCGGCTCTGTGAGCGCCCCTGAGCGCCGGCAGCGGCCGCGGTGGGTTCTTCAG	117177	Hs.258209	GO:0005085|GO:0005515|GO:0006893|GO:0042384|GO:0033365|GO:0015031|GO:0005813|GO:0005737|GO:0005829|GO:0005932|GO:0005634	NP_783324	RAB3A interacting protein (rabin3)
ASHG19A3A000551	0.0248456	1.52289	up	1436.66	904.263	10.3247	9.7179	448.913	1536.83	1439.03	1134.96	504.12	1381.07	1052.25	831.703	634.174	2142.33	2035.87	9.56301	10.4328	10.4654	9.99548	9.64759	9.74403	9.6394	10.1556	9.45277	10.7602	10.6815	coding	NM_000244	MEN1	RefSeq_coding	2785	chr11	-	64570995	64578188		TATTTCCAGGCTCAGCGGGGCAGGGGCCGCCGCCCACCGCCCGCCGCCATGGGGCTGAAG	4221	Hs.423348	GO:0070412|GO:0000403|GO:0003690|GO:0000400|GO:0018024|GO:0047485|GO:0005515|GO:0006281|GO:0000165|GO:0007420|GO:0034968|GO:0046329|GO:0045786|GO:0008285|GO:0045736|GO:0001933|GO:0043433|GO:0051974|GO:0000122|GO:0030511|GO:0032925|GO:0006974|GO:0009411|GO:0010332|GO:0000785|GO:0032154|GO:0005737|GO:0005829|GO:0035097|GO:0035097|GO:0016363|GO:0005730|GO:0005634|GO:0043234|GO:0005625	NP_570716	Multiple endocrine neoplasia I
ASHG19A3A003976	0.0467065	1.72506	up	878.647	601.625	9.67221	8.88556	231.373	1397.68	571.89	500.594	176.027	1222.7	877.435	589.762	1121.55	707.399	883.594	8.65051	10.2987	9.16425	8.8517	7.98315	9.55938	9.38307	9.61859	10.2718	9.17301	9.50686	coding	NM_002020	FLT4	RefSeq_coding	4534	chr5	-	180034753	180076624		GAGCAGGCATAGACAAGAAAGCGGCTTCAGgtagctgaagcagagagagagaaggcagca	2324	Hs.646917	GO:0005524|GO:0000166|GO:0005515|GO:0004872|GO:0004714|GO:0005021|GO:0008284|GO:0006468|GO:0007169|GO:0048010|GO:0048010|GO:0048010|GO:0005887|GO:0005886	NP_891555	Fms-related tyrosine kinase 4
ASHG19A3A024757	0.0279257	1.87923	up	112.484	60.1576	6.72143	5.81129	48.3699	129.347	181.869	110.077	44.0117	59.124	39.2051	80.6959	72.0742	97.3219	113.596	6.42214	6.83379	7.54073	6.72166	5.37769	5.38284	5.1521	6.60372	6.3743	6.36052	6.61553	coding	NM_012093	AK5	RefSeq_coding	3962	chr1	+	77748286	78025652		GTCTTCTTTTCTCTCACCTCTATAAGCCACCGTTTTCAGGTCATCTGAAGTCAAGATTTC	26289	Hs.559718	GO:0005524|GO:0004017|GO:0008603|GO:0019206|GO:0000166|GO:0016740|GO:0006172|GO:0046034|GO:0006173|GO:0015949|GO:0055086|GO:0009220|GO:0007165|GO:0005813|GO:0005737|GO:0005829	NP_777283	Adenylate kinase 5
ASHG19A3A026189	0.00508601	1.50095	up	89.227	62.9007	6.42503	5.83915	34.4261	113.114	80.7431	60.7618	41.1393	89.4459	88.7305	66.5203	67.6541	108.434	98.8962	5.92763	6.63367	6.39202	5.89684	5.22933	5.92001	6.22194	6.31137	6.28043	6.51441	6.41827	coding	NM_001114106	SLC44A3	RefSeq_coding	2418	chr1	+	95285900	95360801		TATAGGAAATGCACAGATACGGCATGGTTATTCCTGTTCTTTCTCTTTTGGACTGGTTTG	126969	Hs.483423	GO:0015220|GO:0015871|GO:0055085|GO:0016021|GO:0005886	NP_689582	Solute carrier family 44, member 3
ASHG19A3A045251	0.0458532	1.94635	up	3608.5	1951.49	11.5585	10.5978	601.116	3468.57	2825.17	1886.8	674.653	4278.37	2316.49	1841.58	1167.06	5846.02	6502.6	9.96259	11.6472	11.4092	10.7063	10.0822	11.4857	10.7521	11.3465	10.3266	12.2432	12.3786	coding	NM_001136040	CPSF7	RefSeq_coding	3688	chr11	-	61170120	61197464		AGAGCGGTTCGCGCGCTTCGGGCCTAGTCCGGACTCGCCGCCGCCGCCGCCATATTCCCG	79869	Hs.718984	GO:0003723|GO:0000166|GO:0005515|GO:0008380|GO:0010467|GO:0031124|GO:0006397|GO:0000398|GO:0051262|GO:0006369|GO:0006366|GO:0005849|GO:0005654|GO:0005634	NP_079087	Cleavage and polyadenylation specific factor 7, 59kDa
ASHG19A3A028607	0.000683856	7.04116	up	2110.69	370.745	10.7944	7.97856	191.15	1217.9	3788.1	385.547	72.6575	999.025	205.343	1178.15	1004.34	1749.78	3725.86	8.36879	10.0945	11.8473	8.48841	6.41675	9.25093	7.36791	10.6896	10.1122	10.4646	11.5581	coding	NM_000549	TSHB	RefSeq_coding	578	chr1	+	115572414	115576941		AGAGTGTGCTTATTGCCTAACCATCAACACCACCATCTGTGCTGGATATTGTATGACACG	7252	Hs.406687	GO:0005179|GO:0007186|GO:0009653|GO:0007267|GO:0034641|GO:0042446|GO:0016486|GO:0051592|GO:0043627|GO:0033189|GO:0005576|GO:0005576	NP_000540	Thyroid stimulating hormone, beta
ASHG19A3A025409	0.0229025	2.07879	up	24.6371	12.6458	4.53799	3.48224	9.80752	19.3742	34.1124	19.5823	14.9109	13.9283	5	19.354	14.3127	22.6481	38.021	4.11798	4.16446	5.14377	4.3276	2.98255	3.59159	2.3915	4.47112	4.05595	4.31927	5.07339	coding	NM_001104629	C4orf19	RefSeq_coding	3648	chr4	+	37455551	37595131		AGCCGCTAGCGTCTCCCGGCGCGGCTGCCCGAGGCCGGCGAAGCCATGGGCGCCGGGACC	55286	Hs.107527		NP_060772	Chromosome 4 open reading frame 19
ASHG19A3A002163	0.0222911	1.61559	up	47.3597	28.7521	5.49884	4.80678	20.893	63.1667	45.7002	42.7693	29.462	28.5288	22.1076	47.6516	24.7782	56.0623	46.799	5.215	5.81596	5.56888	5.41792	4.48944	4.46908	4.44246	5.81849	4.84652	5.58674	5.35644	coding	NM_001130148	CCDC77	RefSeq_coding	2305	chr12	+	498515	551804		AACGACTCCACGCAGCTCGCCCTTGGCGAACAGTTGTCTCCAAACGTGGTGTTGCCGTCA	84318	Hs.631656		NP_115734	Coiled-coil domain containing 77
ASHG19A3A002358	0.0236574	1.51521	up	25.3081	17.0958	4.62162	4.0221	12.7147	17.2038	22.2797	13.5081	18.9431	24.3989	15.9143	26.0905	23.2293	28.9902	34.0553	4.4866	3.98863	4.50059	3.78448	3.5181	4.27652	4.04478	4.91322	4.75329	4.66514	4.90884	coding	NM_001135775	C9orf7	RefSeq_coding	2629	chr9	+	136325086	136335909		AACATTGCGGCCGGCGTGTGGATGATGATGGCGGTCGTTCCCATCGTCATCAGCCTGACC	11094	Hs.62003	GO:0003674|GO:0008150|GO:0005575|GO:0016021|GO:0016020	NP_060056	Chromosome 9 open reading frame 7
ASHG19A3A046602	0.00555324	1.86463	up	196.075	98.1956	7.46751	6.56862	56.3709	163.578	223.718	147.707	77.5209	119.104	90.2751	96.5971	127.601	276.01	288.945	6.63533	7.16416	7.83403	7.1346	6.54108	6.28636	6.24572	6.87561	7.17563	7.83548	7.92015	coding	NM_006747	SIPA1	RefSeq_coding	3513	chr11	+	65405577	65418391		GCGGGAGAGCGGCAGCGGGACCCCAGCGCGGGCGGCGGCGGCTGGGCGGGAGCCCCAGAG	6494	Hs.530477	GO:0005096|GO:0046582|GO:0008283|GO:0007010|GO:0035556|GO:0007162|GO:0045786|GO:0030308|GO:0051056|GO:0007165|GO:0005737|GO:0005829|GO:0012505|GO:0005622|GO:0016020|GO:0048471	NP_694985	Signal-induced proliferation-associated 1
ASHG19A3A038407	0.030323	1.60969	up	3829.15	2283.16	11.8028	11.1161	1804.6	3658.95	4006.37	2327.04	1288.96	3412.7	2582.53	2618.74	6213.25	2362.41	4115.18	11.4596	11.7166	11.9239	11.0116	11.0658	11.1394	10.9039	11.8715	12.6749	10.9173	11.7129	coding	NM_001010887	ACER2	RefSeq_coding	2852	chr9	+	19408924	19452500		GCTGTTTGTAGTAAGAAATCTTTGTGGAACCCCAGTGTGTGAAGTAAATTGTATGTTATT	340485	Hs.41379	GO:0017040|GO:0017040|GO:0016787|GO:0006672|GO:0006629|GO:0033629|GO:0001953|GO:0090285|GO:0008284|GO:0032526|GO:0006665|GO:0046512|GO:0005794|GO:0000139|GO:0030173|GO:0016021|GO:0016020	NP_001010887	Alkaline ceramidase 2
ASHG19A3A035082	0.00313953	2.37372	up	145.208	71.5946	7.06863	5.82148	24.6024	160.247	155.599	50.9579	37.7197	124.95	119.743	70.1329	110.853	206.156	168.26	5.44678	7.13526	7.3206	5.65383	5.03128	6.35226	6.62324	6.38685	6.98072	7.42418	7.16416	coding	NM_001145354	MKLN1	RefSeq_coding	11266	chr7	+	130794854	131181397		TCCATAAACTATTGGATTCATAACCTGCTCCATGCTTGAAAACATGGGGATTGGAATTCG	4289	Hs.44693	GO:0005515|GO:0007165|GO:0005737	NP_037387	Muskelin 1, intracellular mediator containing kelch motifs
ASHG19A3A000576	0.0121517	1.51208	up	79.1098	54.2774	6.25654	5.66	33.5043	86.5285	76.0659	66.6405	37.8481	77.6749	55.7192	70.1003	60.1201	68.7104	113.133	5.88873	6.26055	6.29815	6.02694	5.0383	5.73672	5.60933	6.38651	6.11227	5.87306	6.60866	coding	NM_000407	GP1BB	RefSeq_coding	958	chr22	+	19711065	19712297		TGCCGTCTTCTCGCCATGGGCTCCGGGCCGCGCGGGGCGCTGAGCTTACTGCTCCTGCTG	2812	Hs.283743	GO:0005515|GO:0004888|GO:0007596|GO:0007597|GO:0007155|GO:0007166|GO:0030168|GO:0030168|GO:0005887|GO:0005886|GO:0005886	NP_000398	Glycoprotein Ib (platelet), beta polypeptide
ASHG19A3A035023	0.00297628	3.59994	up	52.2911	13.5393	5.50746	3.65949	9.9614	97.6307	57.2697	13.1758	28.6174	10.9037	5.03829	27.9859	47.7514	19.9198	63.1891	4.13828	6.42755	5.88984	3.75068	4.43316	3.27697	2.69836	5.02067	5.78472	4.13849	5.7835	coding	NM_000230	LEP	RefSeq_coding	3444	chr7	+	127881330	127897682		GATGACACCAAAACCCTCATCAAGACAATTGTCACCAGGATCAATGACATTTCACACACG	3952	Hs.194236	GO:0008083|GO:0005179|GO:0051428|GO:0008343|GO:0008206|GO:0021954|GO:0008203|GO:0042755|GO:0006112|GO:0009062|GO:0006006|GO:0042445|GO:0033210|GO:0006629|GO:0032099|GO:0009892|GO:0001542|GO:0001890|GO:0043410|GO:0048639|GO:0045639|GO:0006111|GO:0050796|GO:0030300|GO:0050810|GO:0002021|GO:0032868|GO:0007165|GO:0005576|GO:0005615	NP_000221	Leptin
ASHG19A3A036670	0.029925	1.77195	up	39.2295	21.8919	5.16686	4.34153	15.0847	31.4262	25.8972	28.7569	17.5765	28.6029	19.4385	24.3592	32.2617	52.2311	69.2012	4.73611	4.83603	4.72847	4.8629	3.34992	4.47285	4.28586	4.81219	5.22413	5.48775	5.91261	coding	NM_001033578	SGK3	RefSeq_coding	4241	chr8	+	67624890	67774255		AGGAAGCGCAGTGCGTTCGGCTCCGCGCCCGCCGCGCCGGGAGCAGCACCGCGGGGCCAG	23678	Hs.613417		NP_733827	Serum/glucocorticoid regulated kinase family, member 3
ASHG19A3A011674	0.00577712	6.91632	up	80920.3	20241.5	16.2081	13.4181	11273.1	64813.5	113428	20279.9	790.879	54658.1	14205.5	54414	64091.9	75568.8	113206	13.9321	15.8977	16.7302	14.1106	10.3291	15.4	13.3184	16.2062	15.9618	15.9867	16.4658	coding	NM_000737	CGB	RefSeq_coding	879	chr19	-	49526126	49527593	NM_033378,NM_033377,NM_033183,NM_033142,NM_033043,NM_000894,	GGCTGCCCCGTGTGCATCACCGTCAACACCACCATCTGTGCCGGCTACTGCCCCACCATG	1082	Hs.446683	GO:0005179|GO:0006915|GO:0007267|GO:0034641|GO:0007292|GO:0042446|GO:0016486|GO:0007165|GO:0005576|GO:0005625	NP_000728	Chorionic gonadotropin, beta polypeptide
ASHG19A3A006424	0.00705227	2.16056	up	33.3463	16.8467	5.02709	3.91568	9.21911	37.124	36.8261	25.9637	13.5243	16.2187	19.3076	34.6984	21.4325	30.3879	39.6089	4.03303	5.06734	5.25632	4.71889	2.772	3.77806	4.27644	5.34252	4.63798	4.73142	5.12696	coding	NM_175080	P2RX5	RefSeq_coding	2150	chr17	-	3576523	3599583		GTTTCCCCAAATTCAACTTCTCCAACAATGTGATGGACGTCAAGGACAGATCTTTCCTGA	5026	Hs.408615	GO:0005524|GO:0004931|GO:0004931|GO:0005216|GO:0001614|GO:0001614|GO:0004888|GO:0006812|GO:0007399|GO:0010524|GO:0050850|GO:0035590|GO:0035590|GO:0007165|GO:0006810|GO:0005887|GO:0016020	NP_778255	Purinergic receptor P2X, ligand-gated ion channel, 5
ASHG19A3A010183	0.0397614	2.11625	up	24.8555	15.657	4.49401	3.4125	5	43.3299	15.8822	13.9927	15.9014	38.2783	5.11272	23.104	12.3002	30.6039	23.9129	2.53526	5.28289	3.96919	3.8396	3.1173	4.83573	2.73463	4.73121	3.84064	4.74183	4.39832	coding	NM_001137671	POTEC	RefSeq_coding	2243	chr18	-	14511737	14543599	NR_027480,NM_207355,NM_174981,NM_001145442,NM_001136213,NM_001099771,NM_001083538,NM_001005356,	TTCTCAAGATCTATCTGGACAGACGGCCAGAGAGTATGCTGTTTCTAGTCATCATCATGT	388468	Hs.454726		NP_001131143	POTE ankyrin domain family, member C
ASHG19A3A003294	0.0428445	1.72175	up	13.4271	10.027	3.68335	2.89947	5	13.9766	14.4957	7.44232	10.0018	22.6908	5	8.71703	10.8779	12.3421	20.1536	2.53526	3.6825	3.8343	2.96632	2.41575	4.18854	2.3915	3.32245	3.66416	3.44818	4.14853	coding	NM_001165883	ZNF268	RefSeq_coding	5533	chr12	+	133757994	133783695		GCAGCCAAAAATCACCAAGTCCTGGACACAGTCTGGAAAATTGATGATCTTATGGATTGG	10795	Hs.124047	GO:0003677|GO:0046872|GO:0003700|GO:0008270|GO:0006355|GO:0006351|GO:0005622|GO:0005634	NP_694422	Zinc finger protein 268
ASHG19A3A025769	0.0466988	1.95223	up	133.443	91.58	7.02193	6.05681	31.1425	152.955	102.036	90.2981	29.1248	158.79	148.544	146.335	118.214	121.91	159.204	5.78526	7.06239	6.73306	6.44315	4.46618	6.66986	6.91959	7.49798	7.07138	6.68163	7.08515	coding	NM_001166693	AFF1	RefSeq_coding	9285	chr4	+	87856153	88062205		CACTTTGCATTGACTGGAAACAATGGCATTTACAGAAAGAGTCAACAGCAGTGGCAACAG	4299	Hs.480190	GO:0003700|GO:0016563|GO:0045893|GO:0006351|GO:0005634	NP_005926	AF4/FMR2 family, member 1
ASHG19A3A012881	0.00903077	3.43232	up	159477	59377.2	17.1969	15.4177	65369.8	139521	190843	68437.2	5659.5	103995	53424.5	131224	167651	141116	186506	16.2892	17.048	17.561	15.9272	13.2151	16.3818	15.2753	17.2187	17.2783	16.8908	17.1847	coding	NM_033043	CGB5	RefSeq_coding	880	chr19	+	49547101	49548567	NM_033378,NM_033377,NM_033183,NM_033142,NM_000737,	GTCCCAAGGACCACCCCTTGACCTGTGATGACCCCCGCTTCCAGGACTCCTCTTCCTCAA	93659	Hs.728897		NP_149032	Chorionic gonadotropin, beta polypeptide 5
ASHG19A3A025182	0.0216373	1.79396	up	29.9435	16.7931	4.85129	4.00815	10.3858	21.7276	39.855	22.8081	29.1463	12.6922	8.93296	21.7999	32.6455	23.6824	39.9509	4.194	4.32184	5.37089	4.53685	4.46868	3.47134	3.36986	4.64687	5.24414	4.38474	5.13927	coding	NM_001145856	SH3BP2	RefSeq_coding	9158	chr4	+	2819911	2842822		GCAGGGGAGGCGGGCGTGGATCGCCCCGGGGAAGCCGGCCATGCCCGCCGCGTGGACGCC	6452	Hs.167679	GO:0017124|GO:0005070|GO:0007165	NP_003014	SH3-domain binding protein 2
ASHG19A3A036004	0.049693	1.76388	up	32.3145	21.3955	4.93236	4.11361	9.07186	27.8598	24.9208	18.4655	14.4779	43.7849	21.1776	34.6026	22.607	56.0162	27.8806	4.01044	4.66668	4.66886	4.24667	2.91664	5.00361	4.39067	5.33771	4.71298	5.5853	4.62262	coding	NM_001135702	YWHAZ	RefSeq_coding	3042	chr8	-	101930803	101962799		TGCACTTTAAAGTCCGGGTCTGCCCGTTTTCGTTTCACAGTAACCGACGTCTCAAGTCAG	7534	Hs.492407	GO:0005515|GO:0032403|GO:0019904|GO:0008134|GO:0016070|GO:0006916|GO:0007596|GO:0002553|GO:0016071|GO:0030168|GO:0006626|GO:0042493|GO:0007165|GO:0005737|GO:0005829|GO:0005829|GO:0042470|GO:0005739|GO:0005634|GO:0014069|GO:0043234|GO:0005625	NP_663723	Tyrosine 3-monooxygenase/tryptophan 5-monooxygenase activation protein, zeta polypeptide
ASHG19A3A015305	0.0126759	1.59929	up	25.5122	16.3398	4.65744	3.98001	11.4851	26.0738	21.7632	20.0724	23.0556	18.7283	8.35755	25.4507	30.5177	23.9712	25.2966	4.33808	4.57836	4.46098	4.36253	3.9524	3.94948	3.29755	4.87514	5.14681	4.39916	4.48421	coding	NM_003597	KLF11	RefSeq_coding	4051	chr2	+	10183681	10194963		TCCCGGCCGGCCTGCACGATGCACACGCCGGACTTCGCAGGCCCAGACGACGCGCGCGCA	8462	Hs.12229	GO:0003677|GO:0046872|GO:0003700|GO:0008270|GO:0006915|GO:0008285|GO:0000122|GO:0006366|GO:0005622|GO:0005634	NP_003588	Kruppel-like factor 11
ASHG19A3A034844	0.0486947	1.98645	up	32.6442	16.006	4.78613	3.79594	8.45077	16.5063	21.6374	6.60909	22.5196	28.7362	13.7146	23.4703	35.2128	78.7051	20.3332	3.90925	3.9327	4.45223	2.81766	3.903	4.4775	3.87226	4.75595	5.34718	6.06662	4.16208	coding	NM_133457	EMID2	RefSeq_coding	3034	chr7	+	101006121	101202304		TTTGTCTCTCAGTGGACTCTATAGGTTTGCTACTTTTGCATGACACAGCAAGCCCAGTGT	136227	Hs.654854	GO:0005576|GO:0005578	NP_597714	EMI domain containing 2
ASHG19A3A012484	0.0445746	1.64644	up	204.459	111.36	7.50465	6.7853	64.7961	276.639	211.196	152.659	102.018	135.515	101.814	145.93	68.7168	283.5	240.772	6.8346	7.9379	7.75153	7.18269	7.04687	6.45985	6.40249	7.49425	6.30384	7.87481	7.66557	coding	NM_001238	CCNE1	RefSeq_coding	1958	chr19	+	30302900	30315218		AGCGCGGTGTAGGGGGCAGGCGCGGATCCCGCCACCGCCGCGCGCTCGGCCCGCCGACTC	898	Hs.244723	GO:0050681|GO:0016538|GO:0016301|GO:0005515|GO:0032403|GO:0003713|GO:0006270|GO:0000082|GO:0000082|GO:0030521|GO:0001547|GO:0051301|GO:0031670|GO:0001889|GO:0000278|GO:0031100|GO:0045597|GO:0045893|GO:0006468|GO:0051726|GO:0000083|GO:0051412|GO:0034097|GO:0042493|GO:0032355|GO:0045471|GO:0051597|GO:0010243|GO:0032570|GO:0014074|GO:0033197|GO:0005813|GO:0000307|GO:0005737|GO:0005829|GO:0005730|GO:…	NP_476530	Cyclin E1
ASHG19A3A038421	0.00967959	3.74521	up	84.5393	26.7768	6.17535	4.2703	8.77095	144.174	61.7106	19.5918	12.6923	54.1335	38.6954	50.0957	151.674	63.6142	35.9674	3.96566	6.98184	5.99801	4.32847	2.65458	5.26687	5.13593	5.89714	7.41951	5.7658	4.98977	coding	NM_024013	IFNA1	RefSeq_coding	876	chr9	+	21440439	21441315		ACGTCATGTGCACCTTTACACTGTGGTTAGTGTAATAAAACATGTTCCTTATATTTACTC	3439	Hs.37026		NP_076918	Interferon, alpha 1
ASHG19A3A018003	0.0230476	1.58585	up	43.2997	27.2206	5.41219	4.74693	23.3951	44.1744	52.0413	31.7906	30.6456	33.276	16.9959	50.8591	31.4877	41.0518	40.184	5.37562	5.30953	5.75337	4.99832	4.57459	4.66198	4.12414	5.91857	5.18999	5.15431	5.14739	coding	NM_153638	PANK2	RefSeq_coding	2280	chr20	+	3869741	3904501		TAGCCTCTCATTGGACGGAGGCACGGTCAATCCTCCTCGAGTTAGGGAGCCGACTGGACG	80025	Hs.516859	GO:0005524|GO:0000166|GO:0004594|GO:0005515|GO:0016740|GO:0008219|GO:0015937|GO:0009108|GO:0015939|GO:0006766|GO:0006767|GO:0005737|GO:0005758|GO:0005739|GO:0005730|GO:0005634	NP_705904	Pantothenate kinase 2
ASHG19A3A018058	0.0433345	1.91052	up	52.8571	27.8998	5.62772	4.69376	14.2864	43.2797	48.7525	19.5578	66.4161	24.3072	14.9317	36.3851	34.6765	86.251	67.7976	4.65985	5.2811	5.65966	4.32585	6.24083	4.2715	3.97077	5.41701	5.32589	6.19723	5.88546	coding	NM_181443	BTBD3	RefSeq_coding	4566	chr20	+	11871476	11907242		GCGGGCACAGGGCAAGGCGGCGGACGGCTGCGTCGCCCGAGGCGAGGAGGAGCGCTGGCG	22903	Hs.709366		NP_852108	BTB (POZ) domain containing 3
ASHG19A3A002040	0.0169522	1.72376	up	1822.17	1061.91	10.6567	9.87119	389.254	1904.19	1516.8	1136.14	575.631	1965.63	1242.9	1059.76	795.95	2932.01	2724.34	9.37215	10.7494	10.532	9.99798	9.84431	10.273	9.86848	10.5423	9.77666	11.2289	11.1112	coding	NM_001127695	CTSA	RefSeq_coding	2300	chr20	+	44519590	44527456		GAGGGGATCCCCGAGCCCGGGATCGATGATCCGAGCCGCGCCGCCGCCGCTGTTCCTGCT	5476	Hs.609336	GO:0004180|GO:0008047|GO:0008233|GO:0005515|GO:0004185|GO:0006886|GO:0006508|GO:0005783|GO:0043231|GO:0005764|GO:0005739|GO:0005730|GO:0005634	NP_001161066	Cathepsin A
ASHG19A3A024317	0.0240302	1.72968	up	40.2347	27.7134	5.26038	4.46987	8.15122	57.0789	33.8148	21.3597	24.3353	60.4291	24.2918	23.3795	43.1635	47.9032	36.0682	3.86256	5.6753	5.13156	4.44743	4.0736	5.40849	4.55728	4.75043	5.63912	5.37078	4.99507	coding	NM_032217	ANKRD17	RefSeq_coding	9390	chr4	-	73940502	74124502		GTTACAGCAAGTGGATCCTGTTTTACTTAAAGATGAACCCCAGCAGACTGCTGCTCAGAT	26057	Hs.728781	GO:0003723|GO:0044419|GO:0005737|GO:0005634	NP_942592	Ankyrin repeat domain 17
ASHG19A3A035459	0.00415566	5.34783	up	3169.76	491.85	11.2002	8.78123	710.23	3102.33	3447.89	311.567	204.391	819.166	413.898	540.616	4925.05	1262.1	5740.59	10.1953	11.4762	11.7156	8.18691	8.2313	8.96471	8.32792	9.48234	12.332	10.0005	12.1945	coding	NM_021936	PAPPA2	RefSeq_coding	4370	chr1	+	176432306	176660341		CCTTCCTTGTTTCTTGTGAAAAGTAATAGTGACTGGTTTCCTATAATGGACTCAAAGTTA	60676	Hs.187284	GO:0046872|GO:0004222|GO:0008237|GO:0008233|GO:0008270|GO:0030154|GO:0006508|GO:0001558|GO:0005576|GO:0005622|GO:0016020	NP_068755	Pappalysin 2
ASHG19A3A003112	0.0483646	1.60591	up	41.2464	28.4256	5.29462	4.61123	9.88002	35.3879	43.3701	20.4974	37.4365	56.0121	18.3023	49.8397	19.867	49.069	49.9449	4.12689	5.00256	5.49556	4.39077	5.01267	5.31362	4.21221	5.8896	4.52778	5.40251	5.4497	coding	NM_001161574	MAFF	RefSeq_coding	2383	chr22	+	38597938	38612515		CCGGACCAAGCGGGCCCAGAAGCGGATCAAGCGAGAGCTGAGCGAGAACACGCCGCACCT	23764	Hs.517617	GO:0043565|GO:0003700|GO:0007596|GO:0001701|GO:0007567|GO:0045604|GO:0006355|GO:0006950|GO:0006366|GO:0005654|GO:0005634	NP_036455	V-maf musculoaponeurotic fibrosarcoma oncogene homolog F (avian)
ASHG19A3A053231	0.0163473	1.86473	up	17.5993	11.0091	4.10543	3.20647	5	19.8012	23.639	11.5905	10.0364	13.1377	15.2809	15.1543	13.7739	16.2686	16.9591	2.53526	4.19372	4.58752	3.56863	2.41659	3.51439	3.99746	4.10183	4.00501	3.84337	3.90114	coding	NM_001013657	C15orf58	RefSeq_coding	1351	chr15	+	90777486	90785311		ACCCACTGGATGTCAAGCATTGTGCATAGTTTTCTTCGATTGTTGCAACATCCCTTGCGA	390637	Hs.304673		NP_001013679	Chromosome 15 open reading frame 58
ASHG19A3A036615	0.0483197	1.66374	up	11.6801	8.16756	3.45371	2.71928	5	7.74692	7.71595	5.45239	20.3854	5	5	14.4897	10.9465	12.4389	16.7424	2.53526	2.83789	2.83666	2.61909	3.68563	2.36492	2.3915	4.03429	3.67297	3.45765	3.88282	coding	NM_003702	RGS20	RefSeq_coding	1721	chr8	+	54793441	54871861		CTAGAGCAAAGACCGAGAGCCGGAGAAAGGCGAAAGGCGCGGTGAGCAATCGCCGACGTA	8601	Hs.368733	GO:0005096|GO:0005515|GO:0004871|GO:0009968|GO:0008277|GO:0005737|GO:0005634|GO:0005886	NP_733466	Regulator of G-protein signaling 20
ASHG19A3A011673	0.00780177	8.47764	up	57604.1	13345.2	15.7219	12.6383	7232.83	45417.6	83364.5	13807.8	325.778	36906.2	8453.6	36466.7	44326.2	53059.2	82990.5	13.3072	15.3856	16.3876	13.5491	8.9826	14.7964	12.556	15.6437	15.4098	15.4737	16.0311	coding	NM_000894	LHB	RefSeq_coding	523	chr19	-	49519237	49520347	NM_033378,NM_033377,NM_033183,NM_033142,NM_033043,NM_000737,	TCGAGAAGGAGGGCTGCCCAGTGTGCATCACCGTCAACACCACCATCTGTGCCGGCTACT	3972	Hs.154704	GO:0005179|GO:0005102|GO:0007267|GO:0034641|GO:0042446|GO:0008584|GO:0016486|GO:0006701|GO:0007165|GO:0005576|GO:0005576|GO:0005625	NP_000885	Luteinizing hormone beta polypeptide
ASHG19A3A036403	0.0410484	1.6774	up	48.9687	30.5975	5.46925	4.72302	11.5717	54.4017	33.925	16.4961	37.0303	56.7216	31.1678	20.8216	44.2951	78.4931	61.8756	4.35044	5.6071	5.13634	4.08345	4.98793	5.33048	4.86281	4.57798	5.67754	6.06316	5.75337	coding	NM_001174159	SH2D4A	RefSeq_coding	3266	chr8	+	19171486	19253728		GGCCGCGGCGGGTGTCCGGTGTCCGGTGTCCGGTGTCCGGTGTCTGGAGCCGCTGGCTAG	63898	Hs.303208	GO:0005515|GO:0005737|GO:0005730|GO:0005634	NP_071354	SH2 domain containing 4A
ASHG19A3A003591	0.0353405	1.64171	up	94.1018	68.3056	6.47809	5.76289	20.0876	116.874	70.2256	63.8361	40.6203	145.523	71.4608	97.6389	52.2818	107.135	120.455	5.16002	6.67999	6.18355	5.9666	5.19911	6.55555	5.93317	6.88949	5.9108	6.49796	6.70671	coding	NM_001171654	KLHL5	RefSeq_coding	7189	chr4	+	39046450	39127852		ACGGCCGCCTCCGGAGCCCGACGCGGACTTCCAATAGTAGTCAGACATTATCATCCTGTC	51088	Hs.272251	GO:0003779|GO:0003674|GO:0008150|GO:0005737|GO:0005856	NP_950240	Kelch-like 5 (Drosophila)
ASHG19A3A012145	0.0297792	2.25006	up	32.2528	15.5069	4.88579	3.71583	8.51832	19.5052	29.8446	24.8892	29.8804	9.24664	5	24.112	19.703	44.8456	55.5063	3.92131	4.17413	4.9464	4.6595	4.52052	3.08629	2.3915	4.79665	4.51634	5.27711	5.60409	coding	NM_145245	EVI5L	RefSeq_coding	3834	chr19	+	7895160	7929861		CCGGCGGCTCAGCCCGGGGCGGCGAGGCTCGGCACGGAGATGGCGGCGCGCTCGGCGCAG	115704	Hs.26870	GO:0005096|GO:0005097|GO:0005515|GO:0032313|GO:0005622	NP_660288	Ecotropic viral integration site 5-like
ASHG19A3A040220	0.0401536	1.58515	up	440.751	276.189	8.62956	7.96494	177.713	385.937	367.173	214.013	131.743	422.76	434.714	202.067	521.932	774.717	392.681	8.26157	8.41951	8.5325	7.65259	7.50021	8.01137	8.39897	7.98348	9.17912	9.30146	8.3613	coding	NM_001012979	TCEAL5	RefSeq_coding	1166	chrX	-	102528617	102531797		TATGTGCTTTAACCTTAAGCTGATACTTTCCTTTAGGTGTCACTCTTGTTACCAGCAGAC	340543	Hs.403462	GO:0005515|GO:0005634	NP_001012997	Transcription elongation factor A (SII)-like 5
ASHG19A3A003104	0.0298551	1.74491	up	33.556	21.5617	5.02064	4.21749	12.8349	44.6112	37.5112	23.6144	17.7334	41.9891	11.6366	35.2643	19.9409	34.1702	29.838	4.49946	5.3265	5.2827	4.58517	3.36957	4.9515	3.68173	5.36696	4.53267	4.89114	4.72384	coding	NM_001161500	ZNF611	RefSeq_coding	4417	chr19	-	53206066	53238307		GTGGAGTGTAGGTCATATCGCCGCGATATCTCTTCCAAATGCTTGATGAAAAAGGTGGGA	81856	Hs.143951	GO:0003677|GO:0046872|GO:0008270|GO:0006355|GO:0005622|GO:0005634	NP_112234	Zinc finger protein 611
ASHG19A3A010066	0.0199726	1.69004	up	69.5799	39.699	5.96349	5.20643	14.0771	80.8347	55.3502	50.2425	45.8434	49.0461	39.2859	33.0476	41.8633	112.905	93.4787	4.63798	6.16266	5.84214	5.63359	5.46455	5.14102	5.15502	5.26935	5.59258	6.57088	6.34331	coding	NM_001002249	ANAPC11	RefSeq_coding	916	chr17	+	79849817	79858363		CGCGGTGGGGTCCGGCGGGCGCGGCTTCGGCGGGCGGCAGCCGCTGCAGACGAGCTGCGG	51529	Hs.534456	GO:0046872|GO:0004842|GO:0008270|GO:0031145|GO:0031145|GO:0000075|GO:0051301|GO:0007067|GO:0000278|GO:0007094|GO:0051436|GO:0051437|GO:0070979|GO:0016567|GO:0051439|GO:0005680|GO:0005737|GO:0005829|GO:0005829|GO:0005654|GO:0005654|GO:0005634	NP_057560	Anaphase promoting complex subunit 11
ASHG19A3A012187	0.0368148	1.98052	up	329.978	228.841	8.26215	7.27627	59.7315	487.802	431.507	210.361	66.5172	621.928	185.666	183.579	260.779	295.289	320.913	6.72002	8.75277	8.76166	7.62852	6.24515	8.56555	7.22211	7.83966	8.21409	7.93235	8.07238	coding	NM_145257	C1orf96	RefSeq_coding	5121	chr1	-	229456752	229478688		ATTTGCTCTTTATGGCTGGGGAGAAAAACAGACCGATACAGGAAGCCAGAAGACTCACAA	126731	Hs.725991		NP_660300	Chromosome 1 open reading frame 96
ASHG19A3A004397	0.016173	1.77408	up	20.5397	12.8037	4.30398	3.47691	6.63549	16.9889	19.18	11.7322	22.7358	17.9149	5	17.6655	14.336	27.2435	27.8247	3.58635	3.97131	4.26009	3.58635	3.92095	3.89941	2.3915	4.33534	4.05841	4.57876	4.61996	coding	NM_005380	NBL1	RefSeq_coding	2021	chr1	+	19970807	19984945		TCCGCAGGACCGGCGGGCGCGCGCGGGCTCTGGAGGCCACGGGCATGATGCTTCGGGTCC	4681	Hs.654502	GO:0005576	NP_877421	Neuroblastoma, suppression of tumorigenicity 1
ASHG19A3A047477	0.00581745	1.89832	up	18.483	9.45771	4.14842	3.2237	8.46793	12.4953	15.0319	8.77219	14.6826	6.35016	9.01566	19.3049	17.2902	26.9357	19.8402	3.91216	3.51736	3.88985	3.1808	2.94618	2.69735	3.38204	4.46734	4.32901	4.56254	4.12445	coding	NM_001144881	PRICKLE1	RefSeq_coding	4254	chr12	-	42852140	42877416		GCTCAGGGGCCGGCGCCGCGAGGGGCTGCAGGCCGCGCTCGGCCGCTGTCCGGGCCGCAG	144165	Hs.720221	GO:0046872|GO:0005515|GO:0008134|GO:0008270|GO:0090090|GO:0032436|GO:0031398|GO:0006606|GO:0005737|GO:0005829|GO:0016020|GO:0031965|GO:0005634	NP_694571	Prickle homolog 1 (Drosophila)
ASHG19A3A035282	0.00384477	2.26352	up	27.4023	14.5799	4.7106	3.53204	5	26.0544	20.94	15.9942	18.4425	24.8764	8.58611	19.4419	23.3313	40.5064	34.1399	2.53526	4.57684	4.40148	4.04177	3.45732	4.30226	3.32358	4.47673	4.76015	5.13559	4.91284	coding	NM_170686	ZNF398	RefSeq_coding	5445	chr7	+	148844559	148880116		GGGCCGGGTCGGCGCCGCCTGTGGAGAGGACCCGGCGGCCGGGCCTGCTTGGAGCCGGGC	57541	Hs.632032	GO:0003677|GO:0046872|GO:0016563|GO:0008270|GO:0006355|GO:0005622|GO:0005634	NP_733787	Zinc finger protein 398
ASHG19A3A054042	0.00723595	1.69355	up	35.5348	23.3531	5.13513	4.37507	8.18852	43.4668	37.4779	27.0258	23.1694	26.1238	32.2577	36.8233	29.9705	30.761	34.7095	3.86955	5.28669	5.2809	4.77613	3.96377	4.36012	4.9058	5.43467	5.12025	4.74933	4.93891	coding	NM_024735	FBXO31	RefSeq_coding	3636	chr16	-	87362943	87417394		GCACGAAGTTCCGGCGCATCCTCCACACCGACACCATCTGGAGGAGGCGTTGCCGTGAGG	79791	Hs.567582	GO:0030332|GO:0031146|GO:0007049|GO:0008054|GO:0031571|GO:0006974|GO:0019005	NP_079011	F-box protein 31
ASHG19A3A012147	0.0241113	2.34418	up	4400.75	2421.97	11.9695	10.7404	576.391	5105.32	5451.57	3639.75	809.224	5855.31	1229.2	1864.56	4352.24	3160.01	6470.78	9.90244	12.2011	12.369	11.6289	10.362	11.9524	9.85617	11.3707	12.1725	11.3354	12.3681	coding	NM_025061	LRRC8E	RefSeq_coding	3625	chr19	+	7953389	7966910		GGACTTTGGTCTTGACTGTTCTCTGGGTGCTTAATAAATAATACTAATTATGCAAGTTCT	80131	Hs.501511	GO:0016021|GO:0016020	NP_079337	Leucine rich repeat containing 8 family, member E
ASHG19A3A029488	0.00860796	1.89602	up	18.4954	12.1926	4.17025	3.24728	5	17.59	17.4881	10.3155	15.7162	23.936	5.99526	15.8438	16.0258	26.5731	17.4513	2.53526	4.02233	4.12064	3.40024	3.09315	4.25348	2.95425	4.17369	4.21724	4.54407	3.94355	coding	NM_014809	KIAA0319	RefSeq_coding	6805	chr6	-	24544331	24646383	NM_001168377,NM_001168374,	GGCTGGCCCCGCGCAGAGCGGCGGCGGCGCTCGCTGTCACTGCCGGAGGTGAGAGCGCAG	9856	Hs.26441	GO:0005515|GO:0007275|GO:2000171|GO:0007399|GO:0001764|GO:0005769|GO:0031901|GO:0016021|GO:0005886	NP_055624	KIAA0319
ASHG19A3A052801	0.0344666	1.7749	up	28.7974	16.5111	4.76267	3.93492	8.48254	32.8993	36.7228	28.4493	22.4714	12.9898	10.1627	31.3952	15.109	18.1324	38.5258	3.91424	4.9016	5.25211	4.84763	3.89828	3.50034	3.51412	5.19064	4.13231	4.00961	5.08971	coding	NM_002220	ITPKA	RefSeq_coding	1782	chr15	+	41786121	41795745		AAGATCCGGACCATGGTCAATCTGCCGGTCATAAGCCCTTTCAAGAAGCGCTACGCCTGG	3706	Hs.2722	GO:0005524|GO:0005516|GO:0004683|GO:0008440|GO:0016301|GO:0000166|GO:0016740|GO:0006020|GO:0007165	NP_002211	Inositol 1,4,5-trisphosphate 3-kinase A
ASHG19A3A022204	0.0257195	2.49964	up	264.965	102.688	7.78551	6.46378	48.6562	268.763	137.791	71.9707	57.5849	151.996	183.231	210.622	538.912	346.576	87.127	6.43114	7.89952	7.15464	6.13067	5.93983	6.61255	7.20475	8.04816	9.22105	8.15114	6.23852	coding	NM_003670	BHLHE40	RefSeq_coding	3061	chr3	+	5021096	5026863		CAAACCTAATTGATCAGCAGCAGCAGAAAATCATTGCCCTGCAGAGTGGTTTACAAGCTG	8553	Hs.728782	GO:0003677|GO:0005515|GO:0003700|GO:0016564|GO:0007623|GO:0009649|GO:0045892|GO:0048168|GO:0006355|GO:0009416|GO:0006351|GO:0005794|GO:0005730|GO:0005634|GO:0005634	NP_003661	Basic helix-loop-helix family, member e40
ASHG19A3A011520	0.0365104	6.15487	up	7889.9	2661.52	12.5202	9.89851	669.229	6793.08	7743.07	3315.82	66.7627	8524.9	730.912	2159.4	2380.61	8113.81	20149.5	10.1112	12.6059	12.8789	11.492	6.25232	12.5195	9.11762	11.5879	11.3191	12.7405	13.9893	coding	NM_002785	PSG11	RefSeq_coding	1541	chr19	-	43511808	43530631		TAGTAGACGGTCAAATAATTATATATGGACCGGCATACAGTGGACGAGAAACAGTATATT	5675	Hs.646353	GO:0003674|GO:0007565|GO:0005576	NP_002773	Pregnancy specific beta-1-glycoprotein 6
ASHG19A3A007915	0.0346519	1.62199	up	9.43506	6.40831	3.1452	2.44744	5	17.1209	9.92584	5	12.0415	5	5	11.0488	6.947	6.5678	5	2.53526	3.98112	3.21502	2.3662	2.57934	2.36492	2.3915	3.65137	3.06959	2.60685	2.34725	coding	NM_002472	MYH8	RefSeq_coding	6038	chr17	-	10293641	10325267		AAATCCAGCTGAACCATGCCAATCGCTTAGCTGCAGAGAGTTTAAGGAACTACAGGAACA	4626	Hs.700484	GO:0005524|GO:0003779|GO:0005516|GO:0003774|GO:0000166|GO:0008307|GO:0006936|GO:0030049|GO:0005737|GO:0005829|GO:0005859|GO:0030016|GO:0032982	NP_002463	Myosin, heavy chain 8, skeletal muscle, perinatal
ASHG19A3A052218	0.000959029	2.08614	up	11.9221	6.40694	3.50814	2.44731	5	9.33726	16.4009	5	12.0347	5	5	13.7252	9.95158	7.86186	14.2557	2.53526	3.09728	4.02158	2.3662	2.57866	2.36492	2.3915	3.95636	3.53462	2.80037	3.63862	coding	NM_016190	CRNN	RefSeq_coding	1913	chr1	-	152381718	152386750		TCAAAGATGCCTCAGTTACTGCAAAACATTAATGGGATCATCGAGGCCTTCAGGCGCTAT	49860	Hs.242057	GO:0005509|GO:0016337|GO:0009408|GO:0005737|GO:0016020	NP_057274	Cornulin
ASHG19A3A000786	0.00807339	1.83578	up	21.428	12.1063	4.36472	3.48833	5.50953	31.0864	22.2379	14.9149	22.6339	12.1049	5.36807	21.4826	16.496	22.8205	14.4445	3.35129	4.82056	4.49802	3.93615	3.9141	3.41078	2.82936	4.623	4.25901	4.33061	3.65715	coding	NM_001005335	HNRNPL	RefSeq_coding	1895	chr19	-	39327028	39342979		CCGGGACGGCCGGTCAGGCTCGCCGCCGAGCTGGAGAACTACGATGACCCGCACAAAACC	3191	Hs.644906	GO:0003723|GO:0000166|GO:0010843|GO:0005515|GO:0006396|GO:0008380|GO:0010467|GO:0000398|GO:0005737|GO:0030530|GO:0005654|GO:0005634|GO:0030529	NP_001524	Heterogeneous nuclear ribonucleoprotein L
ASHG19A3A002695	0.0364696	1.71629	up	45.9876	32.5597	5.49148	4.71219	8.69748	47.2509	48.7801	46.2077	22.8901	52.4046	32.5986	46.5962	32.7644	41.138	59.3961	3.95478	5.40162	5.66021	5.5221	3.93745	5.22764	4.91897	5.78296	5.24897	5.15654	5.6986	coding	NM_001144887	CITED1	RefSeq_coding	830	chrX	-	71521489	71525764		ctccgccactttctagcgctgtgaccttggCACAACAGCTCCAGCTGGCAGCATCACTTC	4435	Hs.40403	GO:0050693|GO:0070410|GO:0010843|GO:0008022|GO:0005515|GO:0003700|GO:0016563|GO:0016563|GO:0003713|GO:0016564|GO:0060395|GO:0007420|GO:0001658|GO:0008283|GO:0000578|GO:0060711|GO:0042438|GO:0030318|GO:0060231|GO:0001656|GO:0030178|GO:0003340|GO:0045668|GO:0043473|GO:0043473|GO:0001890|GO:0045768|GO:0010628|GO:0030511|GO:0006357|GO:0051591|GO:0034097|GO:0043627|GO:0043627|GO:0032868|GO:0034341|GO:…	NP_004134	Cbp/p300-interacting transactivator, with Glu/Asp-rich carboxy-terminal domain, 1
ASHG19A3A033071	0.047178	1.64418	up	128.013	99.7653	6.94882	6.23145	32.8058	107.057	111.189	55.0546	47.8372	218.386	144.743	102.438	139.816	179.01	128.569	5.85811	6.55289	6.85325	5.75734	5.55605	7.09909	6.88665	6.96345	7.30694	7.21894	6.79745	coding	NM_017439	PION	RefSeq_coding	3265	chr7	-	76940069	77045717		TTTATTACAGCTTCTGCAGAACACTTGCTTAGACTGTGAGAAGATGGCTGCGTTGCACTG	54103	Hs.186649	GO:0001540|GO:0034205|GO:0030162|GO:0005794|GO:0005802	NP_059135	Pigeon homolog (Drosophila)
ASHG19A3A005864	0.000273449	5.32163	up	3553.88	712.106	11.6699	9.25802	787.791	2480.92	5707.56	872.333	190.393	1150.96	559.058	2439.23	2818.67	2653.81	5223.08	10.3397	11.1254	12.4404	9.61435	8.11719	9.46558	8.75327	11.7653	11.5547	11.0789	12.0548	coding	NM_138466	ZNF837	RefSeq_coding	1948	chr19	-	58878990	58892389		GCGTGGATCTCCCGGCCAGGCTCTCAGCTGTCAGATCCTACAACCAGAACTCTGCGCCCC	116412	Hs.222236	GO:0003677|GO:0046872|GO:0008270|GO:0005622|GO:0005634	NP_612475	Zinc finger protein 837
ASHG19A3A026216	0.0490644	1.5484	up	37.94	24.0768	5.16716	4.53638	12.9067	25.2521	30.5228	15.6752	43.6402	25.3011	22.8609	26.837	41.7501	57.171	46.1069	4.50647	4.53355	4.97775	4.01027	5.35833	4.32382	4.48302	4.95455	5.5892	5.61338	5.33453	coding	NM_001166060	GLRB	RefSeq_coding	3059	chr4	+	157997554	158093242		GGTCCCCGCTGCGGTGGCGCCCGCGGAGACGCTCCGGGTGGAGAGATGCAGAGGGCCGGG	2743	Hs.32973	GO:0005230|GO:0016934|GO:0016934|GO:0016933|GO:0016594|GO:0005216|GO:0005515|GO:0004872|GO:0007340|GO:0007628|GO:0034220|GO:0006811|GO:0007399|GO:0007218|GO:0051291|GO:0042391|GO:0060013|GO:0001964|GO:0007268|GO:0060012|GO:0055085|GO:0007601|GO:0030054|GO:0034707|GO:0005887|GO:0005624|GO:0005886|GO:0045211|GO:0045202	NP_001159533	Glycine receptor, beta
ASHG19A3A008448	0.0410725	1.52828	up	44.9411	29.5638	5.45247	4.84056	21.6455	55.5554	47.5533	15.6743	41.8781	39.1162	29.505	51.0909	28.529	40.85	46.0679	5.26617	5.63704	5.62695	4.01008	5.26849	4.86187	4.7962	5.92605	5.04362	5.14766	5.33353	coding	NM_199282	ARHGAP27	RefSeq_coding	3654	chr17	-	43471268	43503012		CACGGGAAGCCATACTTCTACAATCCAGAGGACTCCTCTGTTCGATGGGAGCTGCCCCAG	201176	Hs.463165	GO:0005096|GO:0030675|GO:0017124|GO:0043089|GO:0006898|GO:0007165|GO:0005737|GO:0005622|GO:0016020	NP_954976	Rho GTPase activating protein 27
ASHG19A3A001037	0.0242953	2.17451	up	99.8885	44.2299	6.37497	5.25428	12.9068	103.803	87.3797	57.0755	40.2825	72.5647	38.3202	57.3425	26.8222	178.827	145.156	4.50661	6.5147	6.50693	5.8083	5.18202	5.65125	5.1232	6.09186	4.95867	7.21721	6.96044	coding	NM_001017529	PRR5	RefSeq_coding	1560	chr22	+	45064592	45133561		CGGCGGCGGCGGCGCGGGGACCGAGCATCCACAACGGGGTGATCGCCGTCTTCCAGCGCA	55615	Hs.102336	GO:0007049	NP_851850	Proline rich 5 (renal)
ASHG19A3A032723	0.00343757	3.12171	up	1894.35	708.025	10.6764	9.03402	173.363	3564.11	2183	486.152	279.136	1793.79	807.68	908.432	849.062	2393.54	1467.93	8.22367	11.6817	11.043	8.81081	8.73473	10.1375	9.26337	10.2965	9.87179	10.9412	10.2239	coding	NM_002192	INHBA	RefSeq_coding	2175	chr7	-	41728602	41742706		ATTGGAAGGAGGGCAGAAATGAATGAACTTATGGAGCAGACCTCGGAGATCATCACGTTT	3624	Hs.583348	GO:0005125|GO:0048184|GO:0008083|GO:0005179|GO:0042802|GO:0005515|GO:0046982|GO:0004871|GO:0016563|GO:0000082|GO:0007050|GO:0030154|GO:0007166|GO:0007267|GO:0071397|GO:0071372|GO:0006952|GO:0030218|GO:0061029|GO:0040007|GO:0001942|GO:0042541|GO:0002244|GO:0006917|GO:0008584|GO:0048333|GO:0045578|GO:0045786|GO:0030308|GO:0008285|GO:0046882|GO:0045077|GO:0045650|GO:0042326|GO:0007399|GO:0042476|GO:…	NP_002183	Inhibin, beta A
ASHG19A3A026391	0.00134603	2.23053	up	21.6659	11.3414	4.40511	3.24772	5	28.0112	18.5737	10.6532	24.2368	11.3048	5.51217	20.4612	18.782	24.2293	19.9381	2.53526	4.67346	4.21415	3.44995	4.06337	3.32644	2.86359	4.55131	4.44678	4.41343	4.13154	coding	NM_015398	FAM149A	RefSeq_coding	2721	chr4	+	187065994	187093816		GCCTAGCGCGGAGCCTGGCGCGGGGGCTGCGAGCACAGGCCCGGGGCTGATCGTAATCGG	25854	Hs.357025		NP_056213	Family with sequence similarity 149, member A
ASHG19A3A053793	0.0473361	1.62983	up	321.027	173.815	8.14112	7.4364	93.4251	329.354	315.153	233.191	190.896	192.136	159.427	148.453	164.843	515.412	452.944	7.3638	8.1951	8.32609	7.76957	8.12259	6.91677	7.00927	7.51974	7.54263	8.70574	8.55743	coding	NM_001130100	KIFC3	RefSeq_coding	3411	chr16	-	57792130	57836439		GTGCGGGAGGGGCGCGAGCGGGCTGGCCGAGGAGGAGGCGGCGGCGTGGAGCTGCCTCCT	3801	Hs.23131	GO:0005524|GO:0003777|GO:0000166|GO:0090136|GO:0007018|GO:0007601|GO:0045218|GO:0005912|GO:0030054|GO:0005813|GO:0005737|GO:0031410|GO:0030659|GO:0005856|GO:0005871|GO:0016020|GO:0005874|GO:0005915	NP_005541	Kinesin family member C3
ASHG19A3A023860	0.0232533	1.99314	up	13.3604	6.7846	3.62085	2.62581	5	13.5581	14.1717	5	6.00537	12.9176	5	10.9261	13.21	23.2962	5	2.53526	3.63821	3.799	2.3662	2.34596	3.49014	2.3915	3.63695	3.94152	4.36218	2.34725	coding	NM_024309	TNIP2	RefSeq_coding	1993	chr4	-	2743386	2758103		GGAGCAGGTTGCGCGCTTCCGGGAGCAGCTGCGAAGGCAGGAGGGCGGCGCCGCCGAGGC	79155	Hs.726088	GO:0005515|GO:0007249|GO:0005737|GO:0005829	NP_077285	TNFAIP3 interacting protein 2
ASHG19A3A013075	0.00314631	1.66001	up	95.5328	55.6065	6.54056	5.80937	47.2092	94.8116	94.0374	57.1525	51.0008	58.6096	64.0602	83.762	82.9453	83.9363	133.704	6.38685	6.38945	6.61436	5.81036	5.68615	5.3718	5.79167	6.6573	6.5735	6.15995	6.84877	coding	NM_207115	ZNF580	RefSeq_coding	1152	chr19	+	56152391	56154835		AGCCCGGGGCCGCCCGGGACCTCGGCCCGTTCCTCCGGACCCGAGAGGCCGCCGCACGGG	51157	Hs.631551	GO:0003677|GO:0046872|GO:0008270|GO:0005622|GO:0005634	NP_996998	Zinc finger protein 580
ASHG19A3A006190	0.0120016	1.5714	up	20.735	13.8794	4.34087	3.68882	7.24679	28.4313	20.1059	9.75904	27.5643	16.9749	7.85195	19.6804	16.5407	18.724	20.928	3.70551	4.69434	4.33779	3.32358	4.3501	3.83591	3.229	4.49449	4.26339	4.05176	4.20347	coding	NM_152916	EMR2	RefSeq_coding	6624	chr19	-	14843204	14889353		AACCTGAGGACCCGAAGCTCTGCACAGATGTGGACGAGTGCAGCTCCGGGCAGCATCAGT	30817	Hs.531619	GO:0004930|GO:0005509|GO:0007186|GO:0007155|GO:0007218|GO:0016021|GO:0005886	NP_690885	Egf-like module containing, mucin-like, hormone receptor-like 2
ASHG19A3A002781	0.00217326	1.65616	up	35.208	21.2492	5.1253	4.39746	15.1054	32.4797	36.694	16.907	35.7051	22.7708	15.7576	32.9262	30.2921	40.5771	38.2788	4.73865	4.88382	5.25074	4.11687	4.90567	4.19352	4.03257	5.26264	5.13438	5.13805	5.08214	coding	NM_001145266	SLC35C1	RefSeq_coding	3160	chr11	+	45825622	45834566		GCGGGCGCCCAGTGCACCGGAGGAGGGCCCCTCTGAAGCGGTCCAGGATCCTGCACATGG	55343	Hs.12211	GO:0005457|GO:0015783|GO:0008643|GO:0055085|GO:0005794|GO:0000139|GO:0016021|GO:0016020	NP_060859	Solute carrier family 35, member C1
ASHG19A3A044923	0.00223464	1.662	up	246.484	156.666	7.88317	7.15025	73.8043	229.076	190.52	211.169	85.3212	227.707	185.326	189.634	256.091	345.869	267.711	7.02317	7.6619	7.60219	7.634	6.71739	7.15777	7.21894	7.88662	8.19038	8.14767	7.81027	coding	NM_020974	SCUBE2	RefSeq_coding	4550	chr11	-	9041049	9113150		AAGCTAAATGAAGGCAAGTGTAGTTTGAAAAATGCTGAGCTGTTTCCCGAGGGTCTGCGA	57758	Hs.523468	GO:0005509|GO:0005576	NP_066025	Signal peptide, CUB domain, EGF-like 2
ASHG19A3A003604	0.0219565	2.1445	up	47.018	26.7602	5.41275	4.31211	6.36214	55.6949	48.2157	18.4648	30.5598	66.8927	11.5215	30.1685	22.1932	83.4646	42.3712	3.53627	5.6409	5.64484	4.24642	4.57057	5.53955	3.66774	5.12828	4.68638	6.15189	5.22419	coding	NM_001171812	GBA	RefSeq_coding	2174	chr1	-	155204239	155211066		ATCCAGGCTAATCACACGGGCACAGGAATCGGATATAACATCATCCGGGTACCCATGGCC	2629	Hs.282997	GO:0043169|GO:0004348|GO:0016798|GO:0005515|GO:0005975|GO:0008219|GO:0006629|GO:0007040|GO:0006665|GO:0005765|GO:0016020	NP_001165283	Glucosidase, beta, acid
ASHG19A3A005184	0.0448771	1.77866	up	10.8605	6.15273	3.25308	2.42229	5	5	5.11672	5	10.7636	5	5	5.97132	11.2187	19.3018	18.5545	2.53526	2.35386	2.44743	2.3662	2.45357	2.36492	2.3915	2.88722	3.71038	4.09177	4.02783	coding	NM_020985	CHAT	RefSeq_coding	2286	chr10	+	50821153	50873150		CTTTTAGAGTCCGACCTCTGGAAATTCGGGTGGCCGCGGGGACCCGGGCGACGTCGGAGG	1103	Hs.302002	GO:0008415|GO:0004102|GO:0016740|GO:0042136|GO:0007269|GO:0007268|GO:0005737|GO:0005829|GO:0005634	NP_066266	Choline O-acetyltransferase
ASHG19A3A038209	0.00715453	2.34402	up	25.8195	13.4339	4.6387	3.40972	5	18.7258	25.6094	7.01851	31.1832	15.9455	8.0222	20.551	21.5447	37.8193	30.6668	2.53526	4.11449	4.71176	2.88797	4.61485	3.7571	3.25343	4.55898	4.64633	5.03814	4.7625	coding	NM_014564	LHX3	RefSeq_coding	2413	chr9	-	139088097	139095004		AGTCGGCGGGAGGCGACCTGCTGCTAGCACTGCTGGCGCGGAGGGCGGACCTGCGCCGAG	8022	Hs.148427	GO:0003702|GO:0046872|GO:0043565|GO:0003700|GO:0008270|GO:0048839|GO:0009887|GO:0006355|GO:0005634	NP_835258	LIM homeobox 3
ASHG19A3H0000563	0.005907	2.0199	up	14.3789	8.20592	3.76766	2.75337	5	17.7983	18.6844	8.2167	17.8129	5	5	16.2142	8.03929	15.1143	10.423	2.53526	4.03938	4.22208	3.09641	3.37878	2.36492	2.3915	4.20771	3.24187	3.74217	3.15273	coding	NM_022658_Exon2-	NM_022658	HOX cluster	1671	chr12	-	54404872	54406543		TCTTTTTATTATTATGACTCACGTATACAATACAAAGTACTTGGACCAGGAACAGGGCTG
ASHG19A3A001000	0.0291603	1.70645	up	217.218	154.659	7.70112	6.93012	74.3087	160.045	243.353	144.378	59.8918	371.706	123.013	166.071	201.569	271.585	260.684	7.03374	7.13327	7.95449	7.1	6.02436	7.83279	6.65972	7.68672	7.84346	7.81421	7.77458	coding	NM_001014436	DBNL	RefSeq_coding	2210	chr7	+	44084238	44101313		GGTTTCAAGGAACCGAAATGAGCAGGAGTCTGCCGTGCACCCGAGGGAGATTTTCAAGCA	28988	Hs.436500	GO:0003779|GO:0008047|GO:0042802|GO:0005515|GO:0016601|GO:0007257|GO:0006915|GO:0006921|GO:0006897|GO:0005938|GO:0005737|GO:0005856|GO:0005829|GO:0005622|GO:0030027	NP_054782	Drebrin-like
ASHG19A3A006302	0.0407491	1.72219	up	19.0567	13.4968	4.22191	3.43766	5	15.5956	18.6195	13.5401	14.3354	20.4975	14.1107	26.7598	17.4657	17.4445	18.4554	2.53526	3.84897	4.21724	3.78826	2.89161	4.06608	3.9071	4.95038	4.34362	3.95162	4.01963	coding	NM_172103	EYA4	RefSeq_coding	5628	chr6	+	133562494	133853257		GCACATCAGTTACTACAAATGGGACAGGAGTGTCTCTTCTTGCAGTCAAAACAGAGCCCT	2070	Hs.596680	GO:0016787|GO:0046872|GO:0004725|GO:0006281|GO:0009653|GO:0016568|GO:0007275|GO:0007601|GO:0005737|GO:0005634	NP_742103	Eyes absent homolog 4 (Drosophila)
ASHG19A3A036209	0.0229616	1.97412	up	49.2791	24.427	5.50259	4.52138	18.9253	62.4595	57.4973	23.6134	23.3302	39.9042	16.3622	66.146	18.1142	42.0556	49.4019	5.07407	5.80054	5.89674	4.58496	3.98097	4.88945	4.07744	6.30312	4.39274	5.18752	5.43486	coding	NM_001135655	LY6H	RefSeq_coding	986	chr8	-	144239331	144241755		GGTCCGCGTCTGCGGCTGCGTTCCCCGAAAGACGAGGCTGCGCCCGGATTCCGGTCCGCA	4062	Hs.159590	GO:0007399|GO:0009887|GO:0031225|GO:0005886	NP_002338	Lymphocyte antigen 6 complex, locus H
ASHG19A3A019745	0.00270758	2.6312	up	22.9542	11.4445	4.44332	3.0476	5	26.088	19.0376	5	15.2834	25.9357	6.00343	15.7065	15.3575	31.1338	30.402	2.53526	4.57931	4.24969	2.3662	3.02921	4.35228	2.95505	4.1605	4.15472	4.76504	4.75066	coding	NM_001082578	RBM9	RefSeq_coding	6957	chr22	-	36134783	36424585		CCGATCCCGGCCTGAGCAAGCGGCCGCGCACTGAGGAGGCGGCGGCCGACGGTGGCGGCG	23543	Hs.282998	GO:0003723|GO:0000166|GO:0005515|GO:0003714|GO:0008134|GO:0016070|GO:0008380|GO:0030520|GO:0006397|GO:0042127|GO:0005737|GO:0005730|GO:0005634	NP_055124	RNA binding protein, fox-1 homolog (C. elegans) 2
ASHG19A3A036555	0.0183802	7.65896	up	24245.5	3565.97	14.1156	11.1785	3860.16	58718.1	31892.6	2198.56	9184.87	2227.76	358.506	3624.75	14131.8	15187.8	21918.1	12.4737	15.7355	14.9996	10.9312	13.8881	10.4659	8.13331	12.3609	13.8538	13.6304	14.1136	coding	NM_153692	HTRA4	RefSeq_coding	2130	chr8	+	38831667	38846174		CCCTGATGTGAGTTCTGGGGTTTATGTATGTAAAGTGGTTGAAGGAACAGCTGCTCAAAG	203100	Hs.661014	GO:0005520|GO:0008233|GO:0004252|GO:0006508|GO:0001558|GO:0005576	NP_710159	HtrA serine peptidase 4
ASHG19A3A008851	0.0418558	1.81633	up	31937.4	22382.7	14.9186	14.0576	8134.83	31076.5	38304.4	27101.5	4948.53	46275.1	25453.5	22452.4	24573.6	28949.8	46267.7	13.4525	14.8118	15.3006	14.5125	13.031	15.1386	14.1534	14.9446	14.6333	14.5999	15.2216	coding	NM_003255	TIMP2	RefSeq_coding	3670	chr17	-	76849062	76921472		AGAAGGAAGTGGACTCTGGAAACGACATTTATGGCAACCCTATCAAGAGGATCCAGTATG	7077	Hs.633514	GO:0008047|GO:0004857|GO:0005178|GO:0046872|GO:0008191|GO:0005515|GO:0008285|GO:0043408|GO:0030814|GO:0045664|GO:0005604|GO:0009986|GO:0005576	NP_003246	TIMP metallopeptidase inhibitor 2
ASHG19A3A019923	0.00130146	2.72692	up	19.2047	7.46241	4.11114	2.66387	5	14.0513	41.1995	6.2903	12.2671	8.75468	5	14.4948	10.5378	18.145	16.8	2.53526	3.69274	5.42207	2.76442	2.60439	3.02377	2.3915	4.03507	3.61858	4.011	3.88739	coding	NM_001009880	C22orf9	RefSeq_coding	6215	chr22	-	45588122	45636650		TGCGTGCCATAGCGGAGGAGCGCGGCCGTCTTAGCCTGCGCCGCGAGGTCTGCGGCCTCG	23313	Hs.592207	GO:0005515	NP_056079	Chromosome 22 open reading frame 9
ASHG19A3A033769	0.0255265	1.96698	up	14.8253	8.54897	3.71549	2.73951	5	16.553	15.204	5	13.7641	13.9808	5	12.4848	5	22.3264	17.3837	2.53526	3.93699	3.90534	2.3662	2.80836	3.59624	2.3915	3.81751	2.39419	4.30028	3.93866	coding	NM_001003801	SMARCD3	RefSeq_coding	1700	chr7	-	150936059	150945749		TGCCGGAGGGGCGCGCAAAGCCACGAAAAGCAAACTTTTTGAGTTTCTGGTCCATGGGGT	6604	Hs.647067	GO:0035257|GO:0005515|GO:0005102|GO:0003713|GO:0008134|GO:0030528|GO:0044255|GO:0016568|GO:0007399|GO:0045893|GO:0006357|GO:0016514|GO:0071565|GO:0071564|GO:0005654|GO:0005634	NP_003069	SWI/SNF related, matrix associated, actin dependent regulator of chromatin, subfamily d, member 3
ASHG19A3A051249	0.0391565	2.35407	up	18.5813	7.89353	3.91662	2.68146	5	36.0121	5.17119	5	18.8242	5.64341	5	13.7702	31.0581	15.0404	10.4359	2.53526	5.02537	2.45395	2.3662	3.5028	2.61153	2.3915	3.96176	5.1697	3.73467	3.15424	coding	NM_002935	RNASE3	RefSeq_coding	716	chr14	+	21359561	21360506		TATTTCAAACTGCACGTATGCAGACAGACCAGGAAGGAGGTTCTATGTAGTTGCATGTGA	6037	Hs.73839	GO:0004519|GO:0016787|GO:0003676|GO:0004522|GO:0004540|GO:0006401|GO:0042742|GO:0005576|GO:0005625	NP_002926	Ribonuclease, RNase A family, 3
ASHG19A3A013342	0.0136748	2.19792	up	17.6691	9.68102	4.07389	2.93775	5	20.9943	16.5685	11.3375	22.0676	5	5	21.6918	15.7853	21.0422	9.93225	2.53526	4.27813	4.03822	3.53826	3.85879	2.36492	2.3915	4.63821	4.19694	4.21762	3.0742	coding	NM_001006946	SDC1	RefSeq_coding	3309	chr2	-	20400557	20425194		TGCGGGGACCACAGCTCCCGAAAGCGACGTTCGGCCACCGGAGGAGCGGGAGCCAAGCAG	6382	Hs.224607	GO:0008092|GO:0001948|GO:0008022|GO:0060009|GO:0060070|GO:0006629|GO:0042157|GO:0048627|GO:0042476|GO:0051591|GO:0051592|GO:0051384|GO:0042542|GO:0009636|GO:0055002|GO:0001657|GO:0042060|GO:0009986|GO:0005737|GO:0005925|GO:0005887|GO:0005886|GO:0043234|GO:0001931	NP_002988	Syndecan 1
ASHG19A3A042671	0.017752	2.50121	up	19.3293	9.31026	4.10703	2.7844	5	7.96368	18.644	5	26.5513	5	5	12.9434	16.1781	31.9315	28.3154	2.53526	2.87581	4.21916	2.3662	4.26415	2.36492	2.3915	3.8716	4.23168	4.7999	4.64404	coding	NM_001005368	ZNF32	RefSeq_coding	1219	chr10	-	44139307	44144152		AGCGGAGAGGTCGGCGGTCCGCAGAGCAGGGTCCCGTGGACCGGAGAGCGGGATGCCGAG	7580	Hs.522885	GO:0003677|GO:0046872|GO:0005515|GO:0008270|GO:0005622|GO:0005634	NP_008904	Zinc finger protein 32
ASHG19A3A022945	0.00124795	3.01453	up	25.0848	9.86318	4.56032	2.96838	5	33.479	31.2613	11.4033	13.0618	14.8509	5	30.0623	11.5782	23.7802	20.3479	2.53526	4.92583	5.01079	3.54644	2.70073	3.66799	2.3915	5.122	3.75106	4.38944	4.16279	coding	NM_031419	NFKBIZ	RefSeq_coding	3938	chr3	+	101568357	101579865		CCTCCTGCGGCGCCGTGGAGTCCCGGTCGAGAGGCGGCGCCCGCGCCGAGCGCCAGCCAG	64332	Hs.319171	GO:0006954|GO:0005634	NP_113607	Nuclear factor of kappa light polypeptide gene enhancer in B-cells inhibitor, zeta
ASHG19A3A023685	0.0377756	1.92487	up	46.3878	26.9538	5.48128	4.53652	16.4473	51.7853	55.3167	45.5236	16.6524	35.6906	20.455	53.0088	25.1523	51.0602	42.0035	4.86806	5.53339	5.84119	5.50163	3.2144	4.74995	4.34856	5.97874	4.86764	5.45539	5.21132	coding	NM_173216	ST6GAL1	RefSeq_coding	4403	chr3	+	186648515	186796339	NM_003032,	TGTATCCATGGTAGAGGTCACAGATTTTCCCTTCAATACCTCTGAATGGGAGGGTTATCT	6480	Hs.207459	GO:0003835|GO:0008373|GO:0044267|GO:0006959|GO:0043687|GO:0018279|GO:0006486|GO:0006464|GO:0005794|GO:0032580|GO:0000139|GO:0005576|GO:0030173|GO:0016021|GO:0016020	NP_775324	ST6 beta-galactosamide alpha-2,6-sialyltranferase 1
ASHG19A3A012934	0.0458308	1.63022	up	190.528	127.404	7.40194	6.69687	42.0129	177.605	119.546	125.205	77.4121	299.072	93.3188	110.94	142.946	383.44	208.688	6.21735	7.28184	6.95845	6.90452	6.53646	7.53568	6.29036	7.08189	7.33645	8.28892	7.4641	coding	NM_014424	HSPB7	RefSeq_coding	2908	chr1	-	16340522	16345285		TTTACAATCTCCATTTTCATTAACGGGGAAACATCCCCGAGCCACTGAGTGCTGTGCTTT	27129	Hs.502612	GO:0008022|GO:0005515|GO:0008016|GO:0009408|GO:0006986|GO:0015030|GO:0005737|GO:0005634	NP_055239	Heat shock 27kDa protein family, member 7 (cardiovascular)
ASHG19A3A029188	0.0295416	1.82799	up	19.1865	11.431	4.15065	3.28039	5	11.3052	19.7585	8.99308	21.9193	11.1311	10.1115	26.2331	10.3376	18.2434	29.2414	2.53526	3.36761	4.30937	3.21279	3.84314	3.30225	3.50853	4.92082	3.59241	4.01874	4.69495	coding	NM_001008220	CPLX2	RefSeq_coding	4676	chr5	+	175298500	175311023		CCACCTCGTGGAGTCGGGCCGGAGCCCTGCAGTGGCTCAGACGGTTGCAGGGACCGCCAG	10814	Hs.193235	GO:0017075|GO:0043303|GO:0006836|GO:0016079|GO:0006904|GO:0031201|GO:0005737|GO:0005829|GO:0030425|GO:0043025|GO:0045202	NP_006641	Complexin 2
ASHG19A3A006106	0.0475801	1.55618	up	50.2623	32.9472	5.5972	4.95919	22.9415	62.0874	71.5058	42.1888	30.5998	48.5598	20.4463	50.5805	36.3504	36.9368	44.1129	5.34823	5.79179	6.20802	5.39955	4.57279	5.12738	4.34801	5.91045	5.39281	5.00605	5.2741	coding	NM_148967	TNFRSF25	RefSeq_coding	1503	chr1	-	6521220	6526255		TTGGTCTGTTTTGTTGCAGAGGCTGCCCAGCGGCCTCCCAGGTGGCGCTGGAGAACTGTT	8718	Hs.462529	GO:0004872|GO:0005031|GO:0006915|GO:0007166|GO:0006917|GO:0008624|GO:0042981|GO:0007165|GO:0033209|GO:0005829|GO:0005576|GO:0005887|GO:0005886	NP_683871	Tumor necrosis factor receptor superfamily, member 25
ASHG19A3A052114	0.00986254	2.08785	up	24.6631	14.0587	4.60164	3.53962	5	24.3131	32.1696	11.2896	30.0236	11.2215	12.7588	19.224	26.0291	20.977	25.266	2.53526	4.4814	5.05461	3.53067	4.53055	3.31443	3.78719	4.46038	4.91812	4.21382	4.48148	coding	NM_007185	CELF3	RefSeq_coding	5593	chr1	-	151672535	151689290		ATCAGAGATCAAGCATCTGGCATCAGGGATCTTCGGACCCAGCAGAAGGATCCGCCACAG	11189	Hs.26047	GO:0003723|GO:0003729|GO:0000166|GO:0008380|GO:0000398|GO:0000381|GO:0005737|GO:0005634|GO:0005634	NP_009116	CUGBP, Elav-like family member 3
ASHG19A3A040384	0.0244677	1.52818	up	49.7306	31.1933	5.59019	4.97838	21.9995	61.3738	59.6352	33.4179	41.6588	34.1243	24.766	58.5952	31.6689	45.4798	41.6309	5.29024	5.77793	5.94686	5.0681	5.25632	4.69273	4.58448	6.12456	5.19696	5.29802	5.19681	coding	NM_001421	ELF4	RefSeq_coding	4195	chrX	-	129198895	129244475		ACCACGGAGACAGACCCCGGCCCGGCGACCGAGCTGGGCCCGTGAGCCACTCGGCCTCAG	2000	Hs.271940	GO:0005515|GO:0043565|GO:0003700|GO:0016563|GO:0001866|GO:0001787|GO:0045944|GO:0006355|GO:0006351|GO:0016605|GO:0005634	NP_001412	E74-like factor 4 (ets domain transcription factor)
ASHG19A3A040056	0.0445006	1.81387	up	11.7384	7.29093	3.42869	2.56962	5	12.9149	15.2383	5	16.4547	5	5	8.79752	19.9443	5.76794	7.7675	2.53526	3.56476	3.90889	2.3662	3.19024	2.36492	2.3915	3.33448	4.53302	2.50239	2.7286	coding	NM_001144886	CITED1	RefSeq_coding	903	chrX	-	71521489	71527037		ATAAAAATGTGCCCGGCGGCAAAGCTGCAGAAGGGGCACCGCTGAGCTGCCGAGAGGAAG	4435	Hs.40403	GO:0050693|GO:0070410|GO:0010843|GO:0008022|GO:0005515|GO:0003700|GO:0016563|GO:0016563|GO:0003713|GO:0016564|GO:0060395|GO:0007420|GO:0001658|GO:0008283|GO:0000578|GO:0060711|GO:0042438|GO:0030318|GO:0060231|GO:0001656|GO:0030178|GO:0003340|GO:0045668|GO:0043473|GO:0043473|GO:0001890|GO:0045768|GO:0010628|GO:0030511|GO:0006357|GO:0051591|GO:0034097|GO:0043627|GO:0043627|GO:0032868|GO:0034341|GO:…	NP_004134	Cbp/p300-interacting transactivator, with Glu/Asp-rich carboxy-terminal domain, 1
ASHG19A3A003722	0.0196188	1.99323	up	23.4292	14.3914	4.53312	3.53801	5	25.4184	27.9198	10.7585	33.3308	14.6687	8.19886	25.9953	19.1737	20.3706	21.6975	2.53526	4.54173	4.84208	3.4645	4.75862	3.65343	3.27823	4.90805	4.47897	4.17187	4.256	coding	NM_001173533	DGCR2	RefSeq_coding	4381	chr22	-	19023794	19109967		ACTGTCACCGAGCCGCTGCGGCCAGAAGTGACCGGGGAGGTGCGTCCTCATCATGGGAAG	9993	Hs.517357	GO:0005488|GO:0004872|GO:0005529|GO:0007155|GO:0009887|GO:0016021|GO:0016020	NP_005128	DiGeorge syndrome critical region gene 2
ASHG19A3A023649	0.0150969	1.50207	up	130.036	82.0577	6.94864	6.36169	65.4929	163.141	160.967	78.4696	72.2654	116.392	77.6687	92.3569	101.533	100.08	162.138	6.85017	7.16068	7.36772	6.25044	6.40719	6.25594	6.04469	6.80413	6.84999	6.39969	7.10962	coding	NM_003741	CHRD	RefSeq_coding	3547	chr3	+	184097860	184107619		TATGCTGCTGCAGAATGAGCTCTTCCTGAACGTGGGCACCAAGGACTTCCCAGACGGAGA	8646	Hs.166186	GO:0019955|GO:0008201|GO:0005515|GO:0045545|GO:0021919|GO:0007417|GO:0009953|GO:0033504|GO:0030900|GO:0001702|GO:0001707|GO:0030514|GO:0030336|GO:0045668|GO:0007389|GO:0045785|GO:0001501|GO:0005576|GO:0005615	NP_003732	Chordin
ASHG19A3A021671	0.0433747	1.91616	up	96.3692	44.3288	6.39415	5.45593	39.758	82.4755	104.502	65.8123	41.4056	36.4113	38.2567	88.8608	33.1688	191.382	77.8257	6.1326	6.19284	6.76583	6.00933	5.24313	4.77342	5.12116	6.74525	5.26645	7.31813	6.07639	coding	NM_001130992	RBP1	RefSeq_coding	1487	chr3	-	139245247	139258671		ATATTGATTATGGTGACTGATAATGACAGCAATGCTATCACTCCCACCAGGGAGCCTTCC	5947	Hs.529571	GO:0008289|GO:0016918|GO:0005501|GO:0019841|GO:0005215|GO:0030852|GO:0033189|GO:0042573|GO:0042572|GO:0006776|GO:0005737	NP_002890	Retinol binding protein 1, cellular
ASHG19A3A053369	0.036646	2.20689	up	15.3587	5.57134	3.71823	2.57622	5.67172	20.1416	24.8769	5	7.18496	5	5	24.1796	5.66049	7.65925	9.63451	3.38902	4.22059	4.66562	2.3662	2.36948	2.36492	2.3915	4.8009	2.82544	2.76521	3.03163	coding	NM_001013658	PTX4	RefSeq_coding	1422	chr16	-	1535940	1538468		ACCTGCAGAACATCGCCAGCAACTACAACGTGTCCTACAACGTTGACGTCCGGTTCCGGA	390667	Hs.553770	GO:0046872|GO:0005576	NP_001013680	Pentraxin 4, long
ASHG19A3A001510	0.00449311	2.16841	up	28.0306	13.2886	4.78647	3.66983	10.9753	23.5194	34.2896	16.9645	17.7836	15.0529	5.66675	27.8372	32.9596	20.4077	29.1701	4.27303	4.43509	5.14926	4.12148	3.37561	3.68531	2.89372	5.01148	5.25596	4.17478	4.69225	coding	NM_001077445	PHF16	RefSeq_coding	4685	chrX	+	46771735	46920640		ACGCGCGGCGGGCAGACGGCTGGGAGCCGCTCCGGATGCTCCAGGATGAAACGCCATAGG	9767	Hs.371977	GO:0046872|GO:0008270|GO:0043966|GO:0043983|GO:0043984|GO:0043981|GO:0043982|GO:0000123	NP_055550	PHD finger protein 16
ASHG19A3A002508	0.00521328	1.83694	up	34.3958	19.6577	5.0438	4.16649	7.60376	51.9573	33.161	17.3921	26.6629	30.3372	16.2926	35.818	29.9224	34.4404	21.0754	3.7731	5.53825	5.10213	4.1625	4.27472	4.54959	4.07254	5.3914	5.11733	4.9016	4.21206	coding	NM_001142395	PRRG1	RefSeq_coding	4508	chrX	+	37208527	37316547	NM_001173486,	GGCGAGTAGCGGAGCGGGACCCGCTGGAATCATCATCCAGGGACGTGCCAGAAACCACAA	5638	Hs.190341	GO:0005509|GO:0005576|GO:0005887|GO:0016020	NP_001166961	Proline rich Gla (G-carboxyglutamic acid) 1
ASHG19A3A006034	0.0399307	2.12181	up	26.0702	13.4206	4.54212	3.45682	5	34.9151	35.2696	18.0396	17.223	18.4058	8.43457	41.2007	10.7471	18.2658	16.0228	2.53526	4.98317	5.1916	4.21221	3.30022	3.92863	3.30778	5.59648	3.64575	4.02102	3.81468	coding	NM_145793	GFRA1	RefSeq_coding	9145	chr10	-	117816443	118031819	NM_001145453,	TTCCGGGTGGTCCCATTCATATCAGTGGAGCACATTCCCAAAGGGAACAACTGCCTGGAT	2674	Hs.388347	GO:0016167|GO:0005178|GO:0004872|GO:0005102|GO:0007411|GO:0007166|GO:0007399|GO:0031225|GO:0019898|GO:0005886	NP_665736	GDNF family receptor alpha 1
ASHG19A3A045190	0.0410799	1.5643	up	73.5886	45.7566	6.03667	5.39116	15.8585	90.3996	51.4752	39.8332	50.8384	64.4668	57.786	46.5941	47.3395	148.333	57.3902	4.81286	6.32179	5.73639	5.31241	5.68034	5.49186	5.65832	5.78264	5.77285	6.95469	5.6517	coding	NM_004223	UBE2L6	RefSeq_coding	1260	chr11	-	57319128	57335180		GGAGGCCACGGGTGCCACACACTCGGTCCCGACATGATGGCGAGCATGCGAGTGGTGAAG	9246	Hs.425777	GO:0016881|GO:0016874|GO:0005515|GO:0004842|GO:0032480|GO:0043687|GO:0006464|GO:0016567|GO:0005829	NP_937826	Ubiquitin-conjugating enzyme E2L 6
ASHG19A3A001420	0.0361717	1.52292	up	172.198	117.532	7.2826	6.67577	35.7653	174.576	115.841	113.039	84.2936	202.335	152.225	102.095	112.417	258.618	269.643	5.97839	7.2571	6.91414	6.76051	6.69583	6.99099	6.95311	6.959	7.00017	7.74515	7.82006	coding	NM_001042462	TRAPPC5	RefSeq_coding	697	chr19	+	7745706	7747748		GCCGAGCAGACTGCTGCGGTTCCTGGGTGGCGGCGGCATGGAGGCGCGCTTCACGCGCGG	126003	Hs.432413	GO:0004383|GO:0020037|GO:0016192|GO:0005794|GO:0030008|GO:0005783	NP_777554	Trafficking protein particle complex 5
ASHG19A3A023278	0.00366848	1.88416	up	42.401	22.6812	5.35728	4.44336	13.2617	35.5051	36.5227	16.4821	40.9342	28.8589	13.8692	31.6196	40.0208	58.7701	51.9677	4.54891	5.00643	5.24447	4.08214	5.21742	4.48271	3.88564	5.20077	5.53096	5.65291	5.50816	coding	NM_001085049	MRAS	RefSeq_coding	4013	chr3	+	138067507	138124376		CGGCGCAGGCTAGGAGGGGGCGGCCTGAGTGCCGTAGCCGAGCCGGGGCTGGAGCGCGCG	22808	Hs.527021	GO:0005525|GO:0030742|GO:0003924|GO:0000166|GO:0006184|GO:0007265|GO:0030036|GO:0007275|GO:0007517|GO:0007165|GO:0005622|GO:0005886	NP_036351	Muscle RAS oncogene homolog
ASHG19A3A040681	0.011888	2.2688	up	44.9033	21.2496	5.40891	4.22698	12.7074	60.6074	55.502	27.1605	14.3847	30.4699	21.5253	47.3256	22.0865	48.2233	35.6748	4.48592	5.76263	5.84739	4.78282	2.89955	4.55512	4.41151	5.80663	4.67955	5.37822	4.97903	coding	NM_001039091	PRPS2	RefSeq_coding	2558	chrX	+	12809473	12842346		TGATGGAACTCCTCATCATGATCAATGCCTGCAAGATTGCGTCATCATCCAGAGTAACTG	5634	Hs.654581	GO:0005524|GO:0016301|GO:0000287|GO:0000166|GO:0042803|GO:0004749|GO:0016740|GO:0044249|GO:0006139|GO:0009116|GO:0009165|GO:0009156	NP_002756	Phosphoribosyl pyrophosphate synthetase 2
ASHG19A3A002065	0.0157586	1.54375	up	60.0192	42.3638	5.85806	5.23162	19.9126	72.7195	69.0712	34.4381	36.2271	81.6716	39.5697	65.2072	36.3569	52.1108	64.6498	5.14479	6.01095	6.15995	5.10956	4.9372	5.8038	5.16277	6.28249	5.39325	5.48384	5.81788	coding	NM_001128173	PAK3	RefSeq_coding	2205	chrX	+	110366304	110464173		GGGGTTTGATGCAGTCACCGGGGAATTCACTCCAGATCTCTATGGCTCACAGATGTGCCC	5063	Hs.656789	GO:0005524|GO:0017124|GO:0046872|GO:0000166|GO:0004674|GO:0016740|GO:0007275|GO:0006468	NP_002569	P21 protein (Cdc42/Rac)-activated kinase 3
ASHG19A3A033349	0.0132187	1.79358	up	21.2322	11.6964	4.32949	3.48665	7.08394	21.4642	33.8764	13.4041	14.9365	12.8924	10.1649	24.0669	11.5719	20.1904	16.2233	3.67173	4.30562	5.13438	3.77346	2.98542	3.48794	3.51468	4.79355	3.75016	4.15928	3.83393	coding	NM_006754	SYPL1	RefSeq_coding	2183	chr7	-	105730952	105753057		GCACGCAGTATGGCGCCCAACATCTACTTGGTTCGCCAGCGGATCAGTCGACTCGGCCAG	6856	Hs.80919	GO:0005215|GO:0007268|GO:0031410|GO:0030659|GO:0016021|GO:0005887|GO:0042470|GO:0016020|GO:0030141|GO:0008021	NP_874384	Synaptophysin-like 1
ASHG19A3A011036	0.0141286	2.41783	up	37.7878	18.8383	5.13303	3.85932	5	42.4486	33.2808	35.2644	24.1447	18.7187	11.0638	18.7974	29.3009	59.5982	43.301	2.53526	5.25486	5.1069	5.14078	4.05546	3.94853	3.61657	4.42746	5.08483	5.67404	5.25012	coding	NM_012289	KEAP1	RefSeq_coding	2577	chr19	-	10596795	10613481		AGCGATGGAGGCGCCGGGGCTCGGGCGGTGGAGGCGGAGCCGGAGCGCGGCCATGGCGGG	9817	Hs.465870	GO:0030528|GO:0001701|GO:0045604|GO:0005913|GO:0005813|GO:0005737|GO:0005783|GO:0005925|GO:0030496|GO:0005730|GO:0005634	NP_987096	Kelch-like ECH-associated protein 1
ASHG19A3A001751	0.00252483	1.61437	up	79.7909	56.0492	6.29483	5.60386	25.3736	87.4214	74.1306	54.2157	39.3295	111.661	49.666	72.1612	73.1555	87.0002	84.8768	5.49369	6.27296	6.26341	5.73688	5.1304	6.205	5.45333	6.42911	6.39501	6.20864	6.19984	coding	NM_032332	WDR83	RefSeq_coding	1219	chr19	+	12780516	12786645	NM_001099737,	GGCCACGGCTACGAGGTGCTGGATGCGGCCGGCTCCTTTGACAACAGTAGTCTCTGCTCC	84292	Hs.657204	GO:0000375|GO:0000398|GO:0000398|GO:0071013|GO:0005737|GO:0005634|GO:0005681	NP_115708	WD repeat domain 83
ASHG19A3A052037	0.0127081	1.92873	up	13.0473	7.69565	3.60117	2.65352	5	14.8885	15.6416	5	16.734	6.74425	5	19.1818	6.08492	13.4331	9.05366	2.53526	3.77876	3.94637	2.3662	3.22514	2.74951	2.3915	4.4561	2.90853	3.57131	2.94595	coding	NM_015540	RPAP1	RefSeq_coding	4698	chr15	-	41809376	41836464		AAATCAGCAACATCTGGTAAGAGAAGCATCTTTGCCCAGGAAATTGCGGCAAGGAGGATA	26015	Hs.371045	GO:0003677|GO:0003899|GO:0016779|GO:0016740|GO:0005634	NP_056355	RNA polymerase II associated protein 1
ASHG19A3A024042	0.0369176	1.72695	up	35.2014	22.3047	5.04489	4.25666	6.60271	36.109	36.3012	17.8419	24.596	25.1365	37.3464	42.5383	16.4141	51.5507	28.2951	3.58139	5.02887	5.23624	4.19779	4.09816	4.3147	5.09125	5.64173	4.25219	5.46745	4.64284	coding	NM_001077704	MIER1	RefSeq_coding	3615	chr1	+	67395925	67454302	NM_001077701,	CGTGACCCAGCTGCGGCCGCCGCGGAGATGTGACCCGGCAGTACGGCAAATATGGCGGAG	57708	Hs.605432	GO:0003677|GO:0004871|GO:0043123|GO:0007165|GO:0005737|GO:0005730|GO:0005634	NP_065999	Mesoderm induction early response 1 homolog (Xenopus laevis)
ASHG19A3A028743	0.0174281	1.6172	up	46.2755	27.9014	5.4621	4.7686	16.1054	65.3399	65.7476	23.6375	37.2813	36.8823	25.6005	38.3032	41.5558	31.8555	34.8511	4.83731	5.86339	6.09218	4.58695	5.00367	4.78938	4.62571	5.49237	5.5834	4.79708	4.94417	coding	NM_000701	ATP1A1	RefSeq_coding	3754	chr1	+	116915794	116947394		TGATTCTCCAGCGACAGGACCCGGCGCCGGGCACTGAGCACCGCCACCATGGGGAAGGGG	476	Hs.371889	GO:0005524|GO:0015662|GO:0016787|GO:0016820|GO:0046872|GO:0015077|GO:0000166|GO:0005515|GO:0005391|GO:0006754|GO:0034220|GO:0034220|GO:0006813|GO:0006814|GO:0055085|GO:0016021|GO:0042470|GO:0005624|GO:0005886|GO:0005886|GO:0005890	NP_001153706	ATPase, Na+/K+ transporting, alpha 1 polypeptide
ASHG19A3A006780	0.0440052	1.69691	up	1868.65	1293.32	10.7535	9.99056	481.664	2436.45	1523.56	1106.95	382.386	2824.62	1670.96	1597.53	854.787	2391.77	2407.78	9.65928	11.0987	10.5343	9.96295	9.22709	10.8206	10.2829	11.1387	9.88161	10.9391	10.9285	coding	NM_198337	INSIG1	RefSeq_coding	2728	chr7	+	155089485	155101942		CCTCCCTGCTGCGGGACAGCAGCTGGTATACATCCCCAGATTTCCTCTATATTCGTTCTT	3638	Hs.520819	GO:0005515|GO:0030967|GO:0008283|GO:0006695|GO:0060363|GO:0042472|GO:0008152|GO:0042474|GO:0045599|GO:0045717|GO:0010894|GO:0060021|GO:0006991|GO:0008202|GO:0006641|GO:0005783|GO:0005789|GO:0016021|GO:0016020	NP_938151	Insulin induced gene 1
ASHG19A3A033140	0.0241654	1.78507	up	25.471	13.5797	4.56086	3.72488	9.14831	35.9408	37.8388	16.6001	18.3386	14.4463	9.36525	28.1224	12.2957	20.0031	18.6254	4.02307	5.02244	5.29617	4.0929	3.44541	3.63713	3.42588	5.02864	3.84046	4.14432	4.03312	coding	NM_002001	FCER1A	RefSeq_coding	1191	chr1	+	159259503	159278013		TCTCCATTACAAATGCCACAGTTGAAGACAGTGGAACCTACTACTGTACGGGCAAAGTGT	2205	Hs.897	GO:0019767|GO:0004872|GO:0007257|GO:0007166|GO:0019370|GO:0050850|GO:0045425|GO:0045401|GO:0043306|GO:0050731|GO:0001812|GO:0001820|GO:0009897|GO:0005887|GO:0005886	NP_001992	Fc fragment of IgE, high affinity I, receptor for; alpha polypeptide
ASHG19A3A053495	0.0201401	2.07018	up	27.475	16.4259	4.70218	3.65243	5	43.1539	33.8099	10.1429	20.6629	28.8518	17.4718	25.7438	18.4914	25.0551	18.5957	2.53526	5.27692	5.13102	3.37583	3.71365	4.48255	4.15485	4.89225	4.42238	4.45985	4.03064	coding	NM_001130006	GSPT1	RefSeq_coding	7166	chr16	-	11961986	12009825		CCCCAGTTGGCGGCGCCGCCAATAACCACGGAGCCGGCAGCGGCGCGGGAGGCCGTGCGG	2935	Hs.528780	GO:0005525|GO:0003924|GO:0000166|GO:0005515|GO:0003747|GO:0000082|GO:0006184|GO:0006919|GO:0000184|GO:0006479|GO:0016567|GO:0042981|GO:0006412|GO:0005622	NP_002085	G1 to S phase transition 1
ASHG19A3A038250	0.0167472	3.32746	up	46.7635	15.7219	5.43412	3.6997	23.1115	56.6375	50.0799	27.2274	17.2784	5.99231	5	48.1325	23.2338	28.4853	74.0119	5.35857	5.66493	5.69769	4.78597	3.30738	2.65507	2.3915	5.83837	4.75374	4.64033	6.00965	coding	NM_004479	FUT7	RefSeq_coding	2428	chr9	-	139924625	139927292		TTTAGCTTCCGGCAAAGAGCTGAGCACAGTACATCTTCAATGTGTAAGATTCTCCTGGGA	2529	Hs.457	GO:0046920|GO:0008417|GO:0016757|GO:0042355|GO:0006486|GO:0005794|GO:0032580|GO:0016021|GO:0016020	NP_004470	Fucosyltransferase 7 (alpha (1,3) fucosyltransferase)
ASHG19A3A053379	0.00311258	2.03302	up	103.967	51.3189	6.56983	5.5462	26.4794	94.897	104.296	71.3858	37.9919	77.578	43.1592	65.4384	54.1526	144.774	160.242	5.5518	6.3908	6.76353	6.1214	5.04846	5.73534	5.27401	6.28773	5.96074	6.92141	7.09476	coding	NM_001040427	HAGH	RefSeq_coding	1648	chr16	-	1859105	1877195		GGCGCAGGCGCTGAGGCTGGCGCGGAGCGGGCGCGGGGCCGCGGGTGCGGAAAGCGCTAG	3029	Hs.157394	GO:0016787|GO:0004416|GO:0046872|GO:0008270|GO:0005975|GO:0006750|GO:0005737|GO:0005737|GO:0005759|GO:0005759|GO:0005739	NP_005317	Hydroxyacylglutathione hydrolase
ASHG19A3A000703	0.00305926	2.27127	up	22.8558	10.7128	4.45563	3.27213	7.93096	24.1461	15.9322	8.69258	23.5929	8.34761	5	20.9484	17.0077	27.5122	31.5884	3.82526	4.47227	3.9734	3.16937	4.00626	2.96826	2.3915	4.58731	4.30436	4.59113	4.80532	coding	NM_001002020	PUS1	RefSeq_coding	1666	chr12	+	132413744	132428406		GAAAGCCCACCGGGCGGGGCGGGAGCTCGCCGCGCATGGCCGGGAACGCGGAGCCGCCGC	80324	Hs.592004	GO:0003723|GO:0016853|GO:0009982|GO:0004730|GO:0001522|GO:0008033|GO:0005739|GO:0005634	NP_079491	Pseudouridylate synthase 1
ASHG19A3A006745	0.0257152	1.65141	up	10.492	6.40017	3.28502	2.56132	5	14.5456	17.1174	5	7.23675	9.76407	5	6.98327	5.19839	10.2971	8.81	2.53526	3.7449	4.08713	2.3662	2.37042	3.14321	2.3915	3.05553	2.73645	3.18099	2.90509	coding	NM_198089	ZNF155	RefSeq_coding	2596	chr19	+	44488354	44502477		GACACTGCTACTTAACAAGGTGGTTTGAGCCAAACTGTGGCACGTTTCAGGCAGGATTCC	7711	Hs.502127	GO:0003677|GO:0046872|GO:0003700|GO:0008270|GO:0006355|GO:0006351|GO:0005622|GO:0005634	NP_932355	Zinc finger protein 155

## Sheet: T vs N_down
# Fold-Change cut-off: 1.5 # P-value cut-off: 0.05 # Condition pairs: T vs N # Column A: ProbeName, it represents probe name. # Column B: P-value, P-value calculated from t-test. # Column C: FCAbsolute, the absolute ratio (no log scale) of normalized intensities between two conditions. # Column D: Regulation, it depicts which group has greater or lower intensity values wrt other group. # Column E…
T vs N 1.5 fold down regulated mRNAs
	P-value	Fold change and Regulation		Group--Raw Intensity		Group--Normalized Intensity		Raw Intensity											Normalized Intensity											Annotations
ProbeName	p-value	FCAbsolute	regulation	T(raw)	N(raw)	T(normalized)	N(normalized)	[32, N](raw)	[34, T](raw)	[42, T](raw)	[50, N](raw)	[63, N](raw)	[71, N](raw)	[81, N](raw)	[86, T](raw)	[90, T](raw)	[95, T](raw)	[114, T](raw)	[32, N](normalized)	[34, T](normalized)	[42, T](normalized)	[50, N](normalized)	[63, N](normalized)	[71, N](normalized)	[81, N](normalized)	[86, T](normalized)	[90, T](normalized)	[95, T](normalized)	[114, T](normalized)	type	seqname	GeneSymbol	source	RNAlength	chrom	strand	txStart	txEnd	Xhyb	probeSeq	EntrezID	unigene	GO	ProteinAccession	product
ASHG19A3A010354	0.00499027	1.75705	down	51.0936	93.1619	5.63278	6.44594	52.7529	67.5133	60.7343	62.1236	74.4264	148.912	127.595	55.4218	39.946	37.9165	45.03	6.54238	5.90686	5.97226	5.93087	6.46298	6.58543	6.70803	6.0443	5.52858	5.04242	5.30224	coding	NM_173557	RNF152	RefSeq_coding	1805	chr18	-	59482303	59560304		TGCATGTATTTCACTGCAGGCTGAAGAAAGCTCAGTCTCAATTGTGTTTCCTGCCTGTCA	220441	Hs.667457	GO:0016874|GO:0046872|GO:0004842|GO:0008270|GO:0006915|GO:0070936|GO:0016021|GO:0005765|GO:0005764|GO:0016020	NP_775828	Ring finger protein 152
ASHG19A3A034288	0.0401161	2.70312	down	34.3075	101.741	4.9164	6.35103	12.9021	21.2897	56.9029	97.9989	174.884	116.838	106.085	26.7157	13.4169	32.2379	55.282	4.50608	4.29375	5.88228	6.55872	7.97175	6.26101	6.45758	4.94812	3.96504	4.81157	5.59762	coding	NM_000596	IGFBP1	RefSeq_coding	1660	chr7	+	45927958	45933266		CAAAACAAACTTATTTTGAACACTCAGCTCCTAGCGTGCGGCGCTGCCAATCATTAACCT	3484	Hs.642938	GO:0005520|GO:0008286|GO:0030307|GO:0007165|GO:0042246|GO:0005576|GO:0005615	NP_000587	Insulin-like growth factor binding protein 1
ASHG19A3A046483	0.00491	1.78542	down	192.062	350.133	7.49916	8.33543	194.775	225.167	195.316	331.463	191.687	410.58	622.161	186.189	94.0988	221.033	230.57	8.4042	7.6298	7.63708	8.27485	8.12804	7.96693	8.90313	7.85993	6.74627	7.5239	7.598	coding	NM_001145077	LRRC10B	RefSeq_coding	2230	chr11	+	61276271	61278484		CCCCACATGGTAATGTTTTCTTTAGAGAGAAGAAAAAACAACTGGCTGTAAACGTAAATT	390205	Hs.441122		NP_001138549	Leucine rich repeat containing 10B
ASHG19A3H0000573	0.00713501	2.00163	down	103.162	224.811	6.64748	7.64865	92.5643	111.646	77.221	129.821	184.116	297.78	419.773	106.797	132.217	86.0022	105.089	7.35069	6.61318	6.32422	6.95558	8.05785	7.53045	8.34872	7.02693	7.22552	6.19255	6.50246	coding	NM_014620_Exon4-	NM_014620	HOX cluster	1180	chr12	-	54448633	54449813		ACTAATTCACATCCACTGGTTTATTATTGATCACGGGGCATTTCACATCGACACTAAAAT
ASHG19A3A053442	0.0408742	1.71791	down	15.1363	24.452	3.84025	4.6209	24.0159	15.6402	14.4281	20.3933	38.9641	24.8454	14.0412	19.8142	6.99237	18.8404	15.1023	5.41306	3.85286	3.82749	4.38336	5.10677	4.30019	3.90114	4.5045	3.07602	4.06007	3.72058	coding	NM_003223	TFAP4	RefSeq_coding	2147	chr16	-	4307187	4323001		AGGTGCCCTCTTTGCAACATTTCAGGAAAACAGAGAAAGAAGTGATAGGAGGGCTCTGTA	7023	Hs.513305	GO:0003677|GO:0070888|GO:0042826|GO:0010843|GO:0005515|GO:0046982|GO:0042803|GO:0043565|GO:0003705|GO:0016566|GO:0016563|GO:0016563|GO:0003713|GO:0016564|GO:0006978|GO:0071549|GO:0043922|GO:0043922|GO:0043392|GO:0043066|GO:0071157|GO:0008285|GO:0045736|GO:0010629|GO:0032582|GO:0043923|GO:0043065|GO:0045944|GO:0045893|GO:0006461|GO:0007090|GO:0005634|GO:0017053	NP_003214	Transcription factor AP-4 (activating enhancer binding protein 4)
ASHG19A3A012770	0.0280611	1.8952	down	11.8726	20.4475	3.35684	4.27919	15.6967	14.6419	7.5753	20.1508	19.8048	30.4314	16.1537	5.03808	7.35404	23.3478	13.2787	4.79581	3.75416	2.81286	4.36742	3.61801	4.55278	4.06193	2.53777	3.13737	4.36517	3.5337	coding	NM_013362	ZNF225	RefSeq_coding	2731	chr19	+	44617547	44637255		TTCCTGGACCTACGCATTGGATCCTTAACGAACTGGTGATCGAATTAGGGGAAAAGAAAC	7768	Hs.279567	GO:0003677|GO:0046872|GO:0008270|GO:0006355|GO:0005622|GO:0005634	NP_037494	Zinc finger protein 225
ASHG19A3A001608	0.0420265	2.63709	down	7.5577	31.7796	2.84391	4.24286	10.6972	5.66681	10.0222	5	19.1265	41.9593	82.1148	6.21674	5	9.65802	8.78245	4.23831	2.52414	3.22783	2.3662	3.53901	4.95061	6.12016	2.92898	2.39419	3.08852	2.89979	coding	NM_001083585	RABEP1	RefSeq_coding	5322	chr17	+	5185557	5289131		AGAAAGAATAAAAGTGGAAAAAGGACAGGCTACCGTTGAACAACTAATGTTTGAAGAGAA	9135	Hs.592121	GO:0005096|GO:0008083|GO:0005515|GO:0042803|GO:0006915|GO:0006944|GO:0006897|GO:0015031|GO:0005813|GO:0005737|GO:0016023|GO:0005769|GO:0055037	NP_004694	Rabaptin, RAB GTPase binding effector protein 1
ASHG19A3A050571	0.012826	1.63438	down	199.715	318.594	7.5779	8.28664	286.662	276.091	169.886	268.942	197.424	355.003	484.939	151.509	180.394	258.025	162.383	8.9494	7.93537	7.44471	7.97783	8.17654	7.77072	8.55874	7.55211	7.68142	7.74131	7.11248	coding	NM_007192	SUPT16H	RefSeq_coding	4684	chr14	-	21819630	21852425		TCTGGGCAGGAATGAAGGCAACATCTTTCCTAACCCTGAAGCGACTTTTGTCAAGGAAAT	11198	Hs.213724	GO:0005525|GO:0008159|GO:0006281|GO:0006260|GO:0009987|GO:0010467|GO:0006337|GO:0050434|GO:0006368|GO:0006366|GO:0016032|GO:0005694|GO:0005654|GO:0005654|GO:0005634	NP_009123	Suppressor of Ty 16 homolog (S. cerevisiae)
ASHG19A3A033098	0.0328415	1.53774	down	164.475	264.736	7.2761	7.89692	142.602	193.369	161.044	315.109	121.445	298.51	446.015	82.9709	193.904	178.885	176.68	7.94996	7.40513	7.36879	8.20259	7.36549	7.53323	8.43331	6.6437	7.78815	7.21769	7.23316	coding	NM_014510	PCLO	RefSeq_coding	17095	chr7	-	82449795	82792197		GTGTTGGGCATGTGAATCTCCAAGTGCCTGTGTAATAAATAAAGTATCTTTATTTCATTC	27445	Hs.12376	GO:0005509|GO:0005544|GO:0005522|GO:0005215|GO:0008270|GO:0007010|GO:0016079|GO:0030054|GO:0005856|GO:0016020|GO:0045202|GO:0008021	NP_149015	Piccolo (presynaptic cytomatrix protein)
ASHG19A3A041264	0.0366383	2.1576	down	28.9748	74.3866	4.6943	5.80373	27.3958	50.0621	30.7887	41.6992	35.7865	97.0097	170.042	27.2534	10.1251	33.5162	22.1032	5.59862	5.48384	4.98921	5.38065	4.9103	6.02591	7.10315	4.97816	3.5637	4.86738	4.28349	coding	NM_080832	PABPC5	RefSeq_coding	3447	chrX	+	90689596	90693582		AGACATGCTCATTGTAAAAAATGTACACAAGGCAGAAGGAAGTAAAATTTCCACAGTTCA	140886	Hs.246590	GO:0003723|GO:0000166|GO:0005737	NP_543022	Poly(A) binding protein, cytoplasmic 5
ASHG19A3A010176	0.0130831	1.51633	down	34.9331	51.564	5.07926	5.67984	33.1392	36.4099	21.208	46.336	53.8815	62.7623	61.7008	42.0672	32.5523	34.9006	42.4609	5.87132	5.04052	4.42143	5.52617	5.79869	5.46023	5.74281	5.62629	5.23879	4.92246	5.22607	coding	NM_000529	MC2R	RefSeq_coding	3652	chr18	-	13882042	13915535		AGGATGTGTACTCAAGCTGATAGTAATTCTGAGCCCTGTCTAATAAAAAAGGAAGGATGT	4158	Hs.248144	GO:0004930|GO:0004978|GO:0004977|GO:0005515|GO:0004872|GO:0007186|GO:0007187|GO:0030819|GO:0005887|GO:0005886|GO:0005886	NP_000520	Melanocortin 2 receptor (adrenocorticotropic hormone)
ASHG19A3A044561	0.0196022	2.17225	down	10.4456	23.332	3.18566	4.30485	10.4162	6.07759	8.17934	9.89583	31.2497	44.9131	20.1849	5	9.36488	15.026	19.0258	4.19855	2.58356	2.9186	3.34159	4.61932	5.0335	4.33129	2.36059	3.45311	3.73304	4.06505	coding	NM_199461	NANOS1	RefSeq_coding	4627	chr10	+	120789227	120793854		TTGGTAAATACTAATGGGAGTAGACAGAGTTGTATGGCCTGGACAGTGGAAACCAAGAGC	340719	Hs.591918	GO:0003723|GO:0046872|GO:0008270|GO:0006417|GO:0005737|GO:0048471	NP_955631	Nanos homolog 1 (Drosophila)
ASHG19A3A050167	0.0417595	1.79132	down	20.8481	41.5086	4.27537	5.11639	13.3176	32.8422	17.9308	16.8481	55.4858	76.6523	45.2389	14.2913	12.9276	28.4762	18.6208	4.55394	4.89963	4.1585	4.11327	5.85934	5.72067	5.33473	4.01307	3.90875	4.63935	4.03292	coding	NM_020377	CYSLTR2	RefSeq_coding	2548	chr13	+	49280950	49283498		GGTGGAGGTGATATGGCATTCTGAAAGTAGGGAGGGACTAAGTCAGTCATCATACTAAAC	57105	Hs.253706	GO:0001631|GO:0004974|GO:0004872|GO:0006955|GO:0005575|GO:0016021|GO:0005886|GO:0005886	NP_065110	Cysteinyl leukotriene receptor 2
ASHG19A3A036270	0.0344725	1.85788	down	9.90096	18.6781	3.21423	4.10789	9.73377	8.13907	6.28894	15.4757	36.4093	8.43694	23.335	8.82343	8.62128	10.3382	17.1948	4.10835	2.90592	2.59767	3.99094	4.9515	2.9805	4.50815	3.33901	3.33488	3.18569	3.92221	coding	NM_025251	ARHGAP39	RefSeq_coding	5147	chr8	-	145754562	145838888		ACACTAAGAAGAAGTCCAAATTGAGAAAGAAACCCAAGCCTTATGTTGAAGAGCCGGATG	80728	Hs.148988	GO:0005096|GO:0007411|GO:0051056|GO:0007165|GO:0007264|GO:0005856|GO:0005829|GO:0005622|GO:0005634	NP_079527	Rho GTPase activating protein 39
ASHG19A3A010648	0.0388027	1.5778	down	128.833	196.812	6.87415	7.53206	80.7299	202.158	147.887	171.784	171.841	240.24	319.467	64.6255	92.5169	167.82	97.9904	7.15272	7.47034	7.25366	7.35223	7.94462	7.22877	7.98195	6.26727	6.72097	7.1292	6.40344	coding	NM_006033	LIPG	RefSeq_coding	4143	chr18	+	47088426	47119276		AAATGAGGAACAAGAGGAACAGCAAAATGTACCTAAAAACCCGGGCAGGCATGCCTTTCA	9388	Hs.465102	GO:0008201|GO:0016787|GO:0004465|GO:0008970|GO:0004620|GO:0005515|GO:0004806|GO:0008283|GO:0042632|GO:0034375|GO:0016042|GO:0006629|GO:0009395|GO:0055091|GO:0032376|GO:0010983|GO:0050746|GO:0007584|GO:0043691|GO:0005576|GO:0005615	NP_006024	Lipase, endothelial
ASHG19A3A036523	0.0240165	1.93978	down	1670.21	3144.96	10.5558	11.5117	1295.86	1093.07	1075.13	2737.68	2969.9	3293.11	5428.25	1034.91	2953.27	1953.98	1910.89	11.0135	9.94543	10.0649	11.2337	12.3115	11.0794	11.9203	10.4999	11.611	10.6253	10.5881	coding	NM_001160008	NRG1	RefSeq_coding	2377	chr8	+	32405727	32618507		GCTTGCCCTCCACCCTATAGTATCTATTTTATGAAATTCCAAGAAGGGATGAATAAATAA	3084	Hs.453951	GO:0043125|GO:0043125|GO:0005125|GO:0008083|GO:0008083|GO:0005515|GO:0030296|GO:0005102|GO:0030971|GO:0003712|GO:0030297|GO:0030297|GO:0007219|GO:0007171|GO:0006916|GO:0055007|GO:0007154|GO:0008283|GO:0043624|GO:0009790|GO:0030879|GO:0010667|GO:0051048|GO:0007399|GO:0014032|GO:0060045|GO:0045785|GO:0030307|GO:0061098|GO:0051155|GO:0043497|GO:0043496|GO:0007169|GO:0055012|GO:0042060|GO:0042060|GO:…	NP_039258	Neuregulin 1
ASHG19A3A033122	0.0363763	2.19248	down	1974.55	4163.35	10.6304	11.763	1729.75	1085.44	1003.68	2620.49	2063.05	9478.07	4925.36	688.26	3815.37	2059.42	3195.13	11.3994	9.93564	9.96197	11.1746	11.7695	12.6872	11.7841	9.84973	11.9844	10.7084	11.3423	coding	NM_001122951	DARC	RefSeq_coding	1106	chr1	+	159175200	159176288	NM_002036,	AGCAAATCCTAGTTCTCTTCCCACCTGTCAACCTGAATTAAAGTCTACACTGCCTTTGTG	2532	Hs.153381	GO:0019957|GO:0004930|GO:0004950|GO:0004872|GO:0004888|GO:0006952|GO:0006954|GO:0016021|GO:0005886	NP_002027	Duffy blood group, chemokine receptor
ASHG19A3A031723	0.0120986	1.865	down	5.38243	12.4769	2.47467	3.37384	5.68376	6.04471	5	7.91094	23.3035	20.4861	5	5	5.00821	5	6.24168	3.39218	2.57855	2.35229	3.04172	3.97863	4.06519	2.3915	2.36059	2.69735	2.35107	2.50817	coding	NM_001017361	C6orf221	RefSeq_coding	1027	chr6	+	74072399	74073896		AAATCTTGATTCACGTGAATCGATTGGACCCTAACGGCGAGGCTGAGATCTTGGTATTTG	154288	Hs.128326		NP_001017361	Chromosome 6 open reading frame 221
ASHG19A3A045123	0.00700941	1.54501	down	46.9498	71.7746	5.51426	6.14187	36.6245	49.4272	33.5584	58.8319	87.135	99.2539	77.0276	38.1133	51.4705	55.4716	53.6579	6.01262	5.46607	5.12025	5.85069	6.75645	6.05605	6.03353	5.48583	5.88815	5.572	5.55325	coding	NM_201403	MOBKL2C	RefSeq_coding	2822	chr1	-	47073387	47082563		AGAGAACAGGCACTGCGGGACCTGCAGGAGAAAGGCGATCCTGTGGCTGGGAATGTGACC	148932	Hs.632401	GO:0046872	NP_958805	MOB1, Mps One Binder kinase activator-like 2C (yeast)
ASHG19A3A021407	0.0241738	1.60785	down	16.2052	25.2417	3.91404	4.59917	16.1871	13.15	16.3581	28.2734	28.9422	36.2617	16.544	16.5374	8.21297	15.2784	27.6941	4.84475	3.59241	4.01603	4.83862	4.45364	4.76862	4.09023	4.23536	3.26968	3.75646	4.6143	coding	NM_183061	SLC9A10	RefSeq_coding	4138	chr3	-	111859754	112013074		TTTTCAGCTATCCTTGTGAGTTCAGATCCCATGCTAACCGCAGCTGCTATAAGAGACCTT	285335	Hs.680112	GO:0015297|GO:0015299|GO:0006812|GO:0030154|GO:0007275|GO:0006814|GO:0007283|GO:0055085|GO:0005929|GO:0020017|GO:0019861|GO:0016021|GO:0005886	NP_898884	Solute carrier family 9, member 10
ASHG19A3A042320	0.0174435	1.68241	down	16.3241	28.5925	3.96701	4.71754	18.5134	21.2245	23.7215	27.0467	24.1572	48.4697	24.7755	12.0769	14.4172	12.869	13.6356	5.04242	4.28996	4.59289	4.77719	4.05793	5.12535	4.5848	3.76936	4.06749	3.50936	3.57297	coding	NM_001004690	OR2M5	RefSeq_coding	939	chr1	+	248308449	248309387	NR_002141,NM_001004689,NM_001004688,ENST00000318104,	TGTTCCTCTCACCTCATGGTGGTGGGAATGTACTATGGAGCAGGTTTGTTCATGTACATA	127059	Hs.553580	GO:0004984|GO:0004872|GO:0050896|GO:0007608|GO:0016021|GO:0005886	NP_001004690	Olfactory receptor, family 2, subfamily M, member 5
ASHG19A3A012427	0.00883103	2.0116	down	8.18292	16.7732	2.92896	3.9373	8.41193	8.07111	13.3617	9.28412	25.3739	16.8469	23.9495	6.20171	5	5	11.463	3.90423	2.89643	3.70462	3.2539	4.16171	3.82711	4.53957	2.92743	2.39419	2.35107	3.30002	coding	NM_017660	GATAD2A	RefSeq_coding	5689	chr19	+	19496641	19619740		AGCAAAACTCGTGTTGTTGAAAAAGTTGCGGCAGAGTCAAATACAAAAGGAAGCCACCGC	54815	Hs.118964	GO:0046872|GO:0005515|GO:0030674|GO:0043565|GO:0003700|GO:0016564|GO:0008270|GO:0006306|GO:0045892|GO:0016581|GO:0016607|GO:0005730|GO:0005634	NP_060130	GATA zinc finger domain containing 2A
ASHG19A3A021024	0.0228619	2.0489	down	57.3517	107.189	5.76392	6.79878	88.4895	83.6083	56.9426	101.545	140.318	87.5975	117.996	77.6553	45.142	46.5026	34.2592	7.28501	6.21021	5.88281	6.60592	7.60428	5.89508	6.60359	6.54108	5.70189	5.32916	4.9184	coding	NM_001080850	CCDC30	RefSeq_coding	3098	chr1	+	43000559	43120335		TTGAAAGTGAGTGGTCAAAAGAGAGAGAGAGAGAGAAGCAGTTGGCATCTGGTCTTGACA	728621	Hs.729640		NP_001074319	Coiled-coil domain containing 30
ASHG19A3A028423	0.0474881	2.00861	down	7.10996	18.6417	2.79422	3.80042	9.36728	5	5	5	20.8425	44.9265	13.0722	5.30923	9.50497	10.6837	7.16182	4.05595	2.35386	2.35229	2.3662	3.73208	5.03399	3.81386	2.71331	3.47558	3.23095	2.63933	coding	NM_001713	BHMT	RefSeq_coding	2515	chr5	+	78407603	78428112		TTTGAACACGTTGAAGAAGCTGTGTGGGCAGTTGAAACCTTGATAGCATCCGGTAAACCT	635	Hs.80756	GO:0047150|GO:0008898|GO:0046872|GO:0008168|GO:0032403|GO:0016740|GO:0008270|GO:0009086|GO:0006479|GO:0050666|GO:0005737|GO:0043234	NP_001704	Betaine--homocysteine S-methyltransferase
ASHG19A3A054853	0.0199153	1.54102	down	217.092	327.161	7.65585	8.27974	287.914	291.27	182.012	274.173	171.908	549.543	352.266	114.071	181.244	300.885	233.069	8.95683	8.00602	7.54215	8.00413	7.94528	8.38208	8.11038	7.12383	7.688	7.95816	7.61697	coding	NM_005153	USP10	RefSeq_coding	3399	chr16	+	84733554	84813525		AGAATGTAACCCTAATCCATAAACCAGTGTCGTTGCAACCCCGTGGGCTGATCAATAAAG	9100	Hs.136778	GO:0008234|GO:0042980|GO:0002039|GO:0008233|GO:0005515|GO:0004221|GO:0004843|GO:0004843|GO:0030330|GO:0006281|GO:0016579|GO:0016579|GO:0006511|GO:0005737|GO:0005769|GO:0045111|GO:0005634	NP_005144	Ubiquitin specific peptidase 10
ASHG19A3A051329	0.0402186	1.84727	down	10.716	20.175	3.31352	4.19892	10.2686	12.0228	18.3151	17.1645	31.6109	32.7598	9.07095	13.1721	7.09872	5	8.68704	4.17855	3.45964	4.19372	4.1397	4.64478	4.64372	3.38785	3.89729	3.0968	2.35107	2.88262	coding	NM_004554	NFATC4	RefSeq_coding	4976	chr14	+	24837225	24848808		AAGTTTGGGGGAAAAAAGTTTGGAAAAGTTTCTATAATAACGAGGGGGCTTCTGGAGGGA	4776	Hs.77810	GO:0003677|GO:0003700|GO:0003713|GO:0030154|GO:0006954|GO:0006355|GO:0006366|GO:0005737|GO:0045111|GO:0005634	NP_004545	Nuclear factor of activated T-cells, cytoplasmic, calcineurin-dependent 4
ASHG19A3A036972	0.00641447	2.36585	down	647.187	1562.21	9.25317	10.4955	858.241	579.736	935.803	1449.44	991.053	1512.1	3000.2	833.611	522.485	387.093	624.392	10.4551	9.00988	9.85952	10.345	10.6802	9.88316	11.1141	10.1616	9.1799	8.30119	9.00695	coding	NM_001702	BAI1	RefSeq_coding	5535	chr8	+	143545376	143626367		CAGGAAGAAGCAGGGGGGAATCTATTTTTTCTCTCCTTTTCTTTTCTTCAATAAAAAGAA	575	Hs.194654	GO:0004930|GO:0005515|GO:0007186|GO:0007409|GO:0007155|GO:0016525|GO:0008285|GO:0007218|GO:0007422|GO:0007165|GO:0005911|GO:0016021|GO:0005887|GO:0005886	NP_001693	Brain-specific angiogenesis inhibitor 1
ASHG19A3A054117	0.00226512	1.61443	down	200.118	314.234	7.5886	8.27963	181.197	227.74	226.43	278.402	287.866	392.653	431.051	131.665	182.191	237.23	195.451	8.29136	7.65194	7.84957	8.02722	8.78278	7.90854	8.38825	7.33931	7.69518	7.62422	7.3714	coding	NM_176677	NHLRC4	RefSeq_coding	2065	chr16	+	617031	619494		TGTGGGTGGGGGACTAACTGCGCAATGTAGTTAGGTGCTCAATAAACGGAGTTGCCGCTG	283948	Hs.664267		NP_788850	NHL repeat containing 4
ASHG19A3A044811	0.0176356	2.18325	down	1049.94	2577.68	9.893	11.0195	1033.46	1530.72	1663.16	2645.1	1073.7	2033.84	6102.32	620.436	1002.79	632.497	850.015	10.7068	10.4268	10.6622	11.1914	10.7975	10.326	12.0757	9.69667	10.1088	9.01039	9.45319	coding	NM_030774	OR51E2	RefSeq_coding	2785	chr11	-	4701400	4719076		TGCTCTGTACCTGTCAAAAATTTTGAATGTACACCACATGCTATTGTCTGAACTTGAGTA	81285	Hs.501758	GO:0004984|GO:0004872|GO:0050896|GO:0007608|GO:0016021|GO:0005886	NP_110401	Olfactory receptor, family 51, subfamily E, member 2
ASHG19A3A035691	0.0135922	2.07363	down	803.763	1934.25	9.5694	10.6216	967.769	652.078	813.2	1662.12	994.295	1176.59	4870.48	584.975	601.007	1021.52	1149.8	10.6098	9.18789	9.66594	10.5393	10.6849	9.50074	11.7731	9.60528	9.3728	9.70167	9.8828	coding	NM_000025	ADRB3	RefSeq_coding	2660	chr8	-	37820515	37824184		TCCCACTCACCTTCCCCAGCTACAAAAATCTGTATTATCCTCTTAAAGTAAAACTGGAGT	155	Hs.2549	GO:0004930|GO:0031699|GO:0004939|GO:0015052|GO:0051379|GO:0051380|GO:0005515|GO:0042803|GO:0004872|GO:0007188|GO:0007187|GO:0007190|GO:0007189|GO:0007568|GO:0050873|GO:0005975|GO:0002032|GO:0002024|GO:0042755|GO:0006112|GO:0006091|GO:0031649|GO:0040015|GO:0043410|GO:0006898|GO:0009409|GO:0002025|GO:0005887|GO:0005624|GO:0005886|GO:0005886|GO:0043235	NP_000016	Adrenergic, beta-3-, receptor
ASHG19A3A040989	0.0193237	1.90045	down	39.3442	77.8785	5.23775	6.16409	29.8455	49.0931	32.9053	56.6691	79.6326	93.7636	129.482	47.4869	50.6442	22.8978	33.038	5.72041	5.45671	5.09133	5.79914	6.59114	5.98313	6.72662	5.81155	5.86499	4.33438	4.86752	coding	NM_001468	GAGE1	RefSeq_coding	953	chrX	+	49363622	49370958		CCTTGAGTGACTGAAATATCAAATGGCAAGAGACCGTTTAGTTCCTATCATCTGTGGCAT	2543	Hs.278606	GO:0006968	NP_001459	G antigen 1
ASHG19A3A019865	0.0183011	2.0076	down	6.2882	13.8643	2.64559	3.65106	8.38175	6.50894	9.72087	11.6804	25.287	5	18.9722	5	6.49938	5	5	3.90017	2.64334	3.17842	3.58099	4.15503	2.36492	4.25418	2.36059	2.99287	2.35107	2.34725	coding	NM_052945	TNFRSF13C	RefSeq_coding	934	chr22	-	42321035	42322821		GTAAAAGACCGCTTTTAAAATGGGGAAGGCACCATTAAGCCAAAATGAATCTGAAAAAAG	115650	Hs.344088	GO:0004872|GO:0031296|GO:0001782|GO:0031295|GO:0030890|GO:0042102|GO:0002636|GO:0045078|GO:0050776|GO:0009897|GO:0016021|GO:0016020	NP_443177	Tumor necrosis factor receptor superfamily, member 13C
ASHG19A3A019153	0.0137604	2.39605	down	13.63	31.599	3.56339	4.82405	8.58623	9.27067	17.1424	27.0762	51.9269	43.171	27.2347	5.09687	8.35426	15.2805	26.6351	3.9341	3.08644	4.08994	4.77906	5.72245	4.98707	4.69756	2.59411	3.2939	3.75688	4.55906	coding	NM_014586	HUNK	RefSeq_coding	7385	chr21	+	33245627	33376376		ACTCAGCTCCTTGATATTTTAGAAACGGAAAACAGCTACTACCTGGTCATGGAGCTGTGC	30811	Hs.109437	GO:0005524|GO:0000166|GO:0004674|GO:0007275|GO:0006468|GO:0007165	NP_055401	Hormonally up-regulated Neu-associated kinase
ASHG19A3A026203	0.0230511	1.57543	down	1544.01	2484.76	10.4959	11.1516	919.527	2034.86	1611.5	2194.81	1819.19	3747.43	3742.84	864.587	1617.4	1150.9	1984.79	10.5416	10.847	10.6149	10.9252	11.5795	11.2891	11.4225	10.2156	10.7848	9.87	10.6428	coding	NM_001130683	GUCY1A3	RefSeq_coding	9328	chr4	+	156588148	156658212		CCTCCTGTCTCAGAAGCTTGTTAGTTATTGTGCCACCTAAATATTGTAATAAAAGTGTTT	2982	Hs.24258	GO:0005525|GO:0004383|GO:0020037|GO:0000166|GO:0004872|GO:0008015|GO:0007596|GO:0006182|GO:0035556|GO:0007263|GO:0030168|GO:0005737|GO:0008074	NP_001124159	Guanylate cyclase 1, soluble, alpha 3
ASHG19A3A032536	0.0183244	1.84922	down	25.4378	48.8839	4.63396	5.52088	43.0371	22.5986	25.9503	27.2884	40.9125	55.7071	77.4745	21.545	36.33	25.1013	21.1013	6.25136	4.37636	4.73201	4.78873	5.21575	5.30712	6.04144	4.62678	5.39205	4.46245	4.21415	coding	NM_207342	MGC87042	RefSeq_coding	1298	chr7	-	22459064	22539901		TAACATGAGAGGAAATGAGAACGAGGCTTTGGAGCACAGCATTGGATTGCTCATGCAGAA	256227	Hs.729825	GO:0009055|GO:0050660|GO:0005506|GO:0016491|GO:0016021|GO:0016020	NP_997225	STEAP family protein MGC87042
ASHG19A3A021230	0.0115316	1.51038	down	2066.94	3423.06	10.9325	11.5274	1563.99	2369.38	2113.17	3414.33	1471.23	3851.55	6814.22	1148.63	1997.74	2659.37	2113.34	11.2742	11.0594	10.9941	11.5407	11.2575	11.323	12.2417	10.6537	11.0732	11.0826	10.7319	coding	NM_003848	SUCLG2	RefSeq_coding	2363	chr3	-	67425141	67705038		CCTCCCAGAATCTACCAGTTTATGGTAGAAAGATGGGAACCTTATTTGAATGTGTTTTTT	8801	Hs.644919	GO:0005524|GO:0005525|GO:0016874|GO:0000166|GO:0004776|GO:0006104|GO:0006099|GO:0005759|GO:0005739	NP_003839	Succinate-CoA ligase, GDP-forming, beta subunit
ASHG19A3A008201	0.0401374	1.92449	down	7.74129	15.3645	2.84904	3.79352	8.9018	9.9313	10.4193	20.7768	33.0235	8.86655	5.25407	5.20117	5	5	10.896	3.98718	3.18295	3.2892	4.40884	4.74014	3.03808	2.79334	2.66136	2.39419	2.35107	3.21547	coding	NM_152781	C17orf66	RefSeq_coding	1969	chr17	-	34181959	34195895		TAAGCATGTGATCCGGGCTCTCATCAAACAGCTGAAGGAGAAAAATGAGGGTCAAAGGAT	256957	Hs.514820	GO:0005488	NP_689994	Chromosome 17 open reading frame 66
ASHG19A3A019382	0.031888	1.57494	down	44737.6	67313.4	15.3366	15.9919	43208.3	32945.9	33987.9	52198.6	57339.8	81236.4	102584	29162.3	67966.9	35993.5	68368.9	15.7551	14.9011	15.0993	15.5091	16.3751	15.9913	16.329	15.3101	16.0421	14.9188	15.7484	coding	NM_001849	COL6A2	RefSeq_coding	3455	chr21	+	47518032	47552763		GACCTACCTGGCCCCTGAGCTCTGGAGCAAGCCCTGACCCAATAAAGGCTTTGAACCCAT	1292	Hs.420269	GO:0005201|GO:0005515|GO:0030674|GO:0007411|GO:0016337|GO:0030198|GO:0031012|GO:0005576|GO:0005615|GO:0016020|GO:0005578	NP_478055	Collagen, type VI, alpha 2
ASHG19A3A045864	0.0499359	1.55336	down	394.113	620.756	8.51511	9.15051	242.517	590.184	313.29	523.728	542.074	631.081	1164.38	216.355	370.59	504.106	370.154	8.71897	9.03642	8.31802	8.91222	9.75479	8.58575	9.7808	8.09015	8.70596	8.66889	8.27124	coding	NM_145013	C11orf45	RefSeq_coding	3648	chr11	-	128769467	128775592		GCACAGTGATAATCCATTTTCTTCATTGTAACCCCACAGTGTATGTATTCCACATTAAAT	219833	Hs.351133	GO:0005576	NP_659450	Chromosome 11 open reading frame 45
ASHG19A3A004096	0.0233146	1.57476	down	74.9876	128.556	6.16416	6.81929	41.7739	50.4671	58.4409	127.425	87.302	199.541	186.736	71.2599	79.0485	111.38	79.3295	6.20819	5.49666	5.9193	6.92995	6.75921	6.96873	7.23038	6.41205	6.50323	6.55099	6.10275	coding	NM_003037	SLAMF1	RefSeq_coding	2009	chr1	-	160579891	160617081		CCCGGATGCAGGACAGACCCCTCAGAAACAAAACCATGGGCAGTGTATGCTGGGCTGTTA	6504	Hs.523660	GO:0003823|GO:0004888|GO:0044419|GO:0046649|GO:0008284|GO:0009897|GO:0016021|GO:0005886	NP_003028	Signaling lymphocytic activation molecule family member 1
ASHG19A3A045674	0.0115502	2.29967	down	65.3148	171.661	5.98995	7.19138	68.0642	62.1195	89.7846	94.0494	168.054	124.975	403.163	47.3945	66.76	60.4	65.4302	6.90359	5.79242	6.54766	6.50262	7.90632	6.353	8.29136	5.80922	6.26016	5.69427	5.83599	coding	NM_207429	C11orf92	RefSeq_coding	5443	chr11	-	111164170	111170539		CCACCGTACACTGCTTGAAGAGTTCCTCTTCTATTACTTAAAACGTTTTTATTGTGCAAC
ASHG19A3A032097	0.0366765	1.6611	down	2222.25	3581.75	10.9748	11.7069	2509.96	2980.35	1815.88	3599.11	2092.92	3299.01	6407.75	1115.68	2746.57	1379.29	3295.74	11.8838	11.4177	10.7877	11.6168	11.8028	11.0815	12.1499	10.6145	11.5181	10.1225	11.3884	coding	NM_198392	TCF21	RefSeq_coding	3249	chr6	+	134210258	134216675		ATGCCATTCAGTCTGGACTTCAAATCACTTGTCTTCAGAAAATAAAAGATTTGTTCCACC	6943	Hs.78061	GO:0046983|GO:0043565|GO:0003700|GO:0030528|GO:0001658|GO:0060435|GO:0048557|GO:0030855|GO:0048732|GO:0032835|GO:0001822|GO:0048286|GO:0060425|GO:0060426|GO:0007498|GO:0001763|GO:0045892|GO:0045893|GO:0048608|GO:0060541|GO:0007530|GO:0007548|GO:0048536|GO:0006351|GO:0001657|GO:0005634	NP_938206	Transcription factor 21
ASHG19A3A026951	0.0388899	1.60687	down	22.1301	34.367	4.44788	5.13213	27.4853	27.4501	22.5425	33.1444	55.1499	23.7919	32.2636	21.9313	21.9398	20.5664	18.3503	5.60285	4.64531	4.51738	5.05882	5.84696	4.24577	4.90625	4.6555	4.67063	4.18652	4.0119	coding	NM_016591	GCNT4	RefSeq_coding	3436	chr5	-	74323289	74326724		CAGCAAGAATATTCATTAAGGATATTTTCTAAAACCCACACTTGAGAAAACCACCCAATG	51301	Hs.272404	GO:0008109|GO:0003829|GO:0016757|GO:0005975|GO:0006493|GO:0005794|GO:0000139|GO:0016021|GO:0016020	NP_057675	Glucosaminyl (N-acetyl) transferase 4, core 2
ASHG19A3A041670	0.0215782	1.63787	down	217.921	349.401	7.7341	8.44592	202.389	223.867	186.521	300.804	373.573	414.083	456.155	239.374	242.497	175.634	239.631	8.46025	7.62006	7.57481	8.13557	9.19047	7.9794	8.4639	8.24711	8.11422	7.19166	7.65674	coding	NM_001164415	HSFX2	RefSeq_coding	1966	chrX	+	148855725	148858528	uc010nta.2,	TTGCCACAACTTCGATAAAGAGCTTCTTCCGCCAGCTAAACTTGTATGGCTTCCGAAAAC	100130086	Hs.709146	GO:0043565|GO:0003700|GO:0006355|GO:0005737|GO:0005634	NP_001157887	Heat shock transcription factor family, X linked 2
ASHG19A3A009586	0.0423641	1.94634	down	5754.78	10971.5	12.393	13.3538	7733.22	6473.66	5249.41	8965.21	10176.1	9536.28	18446.8	7141.8	7654.8	2778.21	5230.77	13.3877	12.5395	12.317	12.9444	14.0319	12.6936	13.7113	13.3282	12.9601	11.1573	12.056	coding	NM_016438	HIGD1B	RefSeq_coding	654	chr17	+	42925278	42927840		TACCGGCTGAGGTCTCGTGGTTCCACCAAGATGTCCATACACCTGATTCACACCCGAGTG	51751	Hs.287963	GO:0016021|GO:0016020	NP_057522	HIG1 hypoxia inducible domain family, member 1B
ASHG19A3A043481	0.0397543	2.15349	down	1112.3	2280.08	9.96577	11.0725	2028.83	1186.58	1157.34	912.955	3031.01	2769.26	2658.34	423.48	1199.22	952.882	1754.31	11.6035	10.0614	10.1638	9.68497	12.3364	10.7917	10.9457	9.12182	10.3729	9.60528	10.4694	coding	NM_001143764	SYCE1	RefSeq_coding	1309	chr10	-	135368347	135379138		ACTCTGCCTCTTGGTCTGGGCCAGAGGTACATCACAGGTTTTCAATAAATGCTTCCTTAA	93426	Hs.553795	GO:0007049|GO:0051301|GO:0007126|GO:0007128|GO:0000801|GO:0005694|GO:0005634	NP_570140	Synaptonemal complex central element protein 1
ASHG19A3A017332	0.0305365	2.07377	down	45.7307	79.4127	5.26107	6.31332	52.7806	99.126	17.3333	53.9986	97.6089	81.7046	110.971	34.0429	26.4411	58.3986	39.0423	6.54346	6.4481	4.1071	5.73208	6.96787	5.80439	6.51881	5.31536	4.94006	5.64516	5.11062	coding	NM_017671	FERMT1	RefSeq_coding	5167	chr20	-	6055492	6104191		TGAAATAGAAGCGGCGCTTTCTAATTTGGAAGTAACCCTAGAAGGTGGAAAAGCGGACAG	55612	Hs.472054	GO:0005488|GO:0007155|GO:0090162|GO:0051546|GO:0043616|GO:0030054|GO:0042995|GO:0005737|GO:0005856|GO:0005829|GO:0031941|GO:0005925|GO:0005886|GO:0032587	NP_060141	Fermitin family member 1
ASHG19A3A012834	0.0252169	1.58219	down	184.504	284.006	7.49108	8.153	166.415	197.277	159.5	249.911	311.679	373.218	318.805	192.034	217.753	148.845	191.615	8.16665	7.43293	7.35496	7.86731	8.91277	7.83924	7.97904	7.90453	7.95241	6.96025	7.34139	coding	NM_002517	NPAS1	RefSeq_coding	2066	chr19	+	47524142	47549016		AACCAGGAAGGAAAATTCCTCTACATCTCAGAGACAGTCTCCATCTATCTGGGTCTCTCA	4861	Hs.79564	GO:0003677|GO:0003700|GO:0004871|GO:0030528|GO:0007610|GO:0007417|GO:0000122|GO:0006355|GO:0006351|GO:0005634	NP_002508	Neuronal PAS domain protein 1
ASHG19A3A052279	0.0431407	1.50897	down	2124.41	3441.76	10.9642	11.5578	2136.15	2040.72	2866.95	4490.96	1192.41	3551.52	5837.76	1542.31	1588.34	1677.79	3030.36	11.6741	10.8512	11.4283	11.9477	10.9498	11.2016	12.0159	11.0826	10.7599	10.4006	11.2629	coding	NM_004884	IGDCC3	RefSeq_coding	4491	chr15	-	65619464	65670378		TTACTTGGGTTTTGTCACACTCTGCTCATTTTGACTGAATAAAAGTCCTGTTGCCAAAGT	9543	Hs.128292	GO:0050885|GO:0005887|GO:0016020	NP_004875	Immunoglobulin superfamily, DCC subclass, member 3
ASHG19A3A035581	0.00153643	2.06261	down	1024.08	2254.07	9.94251	10.987	1096.9	821.205	1259.92	1717.38	1553.11	2327.15	4575.81	775.616	918.624	1111.92	1257.2	10.7858	9.53496	10.2763	10.5848	11.3409	10.5333	11.6901	10.0355	9.98487	9.81753	10.0059	coding	NM_021020	LZTS1	RefSeq_coding	5459	chr8	-	20103676	20112803		CTTTTGACAGCTTCATTTTATTTTTGACGTCACTTTTTGGCCATGTAAACTATTTGTGGC	11178	Hs.521432	GO:0003677|GO:0005515|GO:0003700|GO:0007049|GO:0048814|GO:0006355|GO:0006386|GO:0006385|GO:0006383|GO:0005794|GO:0016324|GO:0030054|GO:0042995|GO:0005737|GO:0043197|GO:0005730|GO:0005654|GO:0005634|GO:0005886|GO:0014069|GO:0045211|GO:0045202	NP_066300	Leucine zipper, putative tumor suppressor 1
ASHG19A3A012811	0.0472114	1.85056	down	148.058	250.915	7.08117	7.96914	167.594	193.261	98.1795	209.654	318.454	197.407	361.466	73.133	216.444	135.872	171.461	8.17472	7.40385	6.67539	7.62435	8.94814	6.95486	8.14361	6.4486	7.94364	6.82754	7.188	coding	NM_001080401	PPM1N	RefSeq_coding	1718	chr19	+	46001730	46005762		CCAATAACCTCTTTCCTTCTTATTACTCATCTGTTTTTGAGGGGAAGTAGAGTTTTGATT	147699	Hs.532872	GO:0016787|GO:0000287|GO:0030145|GO:0004721	NP_001073870	Protein phosphatase, Mg2+/Mn2+ dependent, 1N (putative)
ASHG19A3A032064	0.0121647	1.72885	down	11.2413	19.6369	3.44425	4.23406	11.9119	12.5728	9.17517	12.6529	37.3739	14.8091	21.4369	9.18029	12.24	11.5219	12.7577	4.39644	3.52528	3.09863	3.69331	5.00941	3.66447	4.40668	3.39278	3.83459	3.34741	3.46679	coding	NM_052913	TMEM200A	RefSeq_coding	5042	chr6	+	130758261	130764208		AAATCTGAGAACTGACCCTGCTAAAAAAGTCAGACAAGTCAAGTGGTGCAGCTGGTGTGT	114801	Hs.591341	GO:0016021|GO:0016020	NP_443145	Transmembrane protein 200A
ASHG19A3A012438	0.0490407	1.51932	down	147.424	233.113	7.0701	7.67353	81.3085	205.373	132.715	217.677	136.806	378.291	351.484	57.8894	149.821	172.813	165.934	7.16416	7.49218	7.10426	7.67504	7.56189	7.85861	8.10795	6.10656	7.40176	7.17026	7.1456	coding	NM_007138	ZNF90	RefSeq_coding	3767	chr19	+	20188802	20231977		GGACAGGCTGTTCGTATTTGACCTATATTAAGTAATGTATAAGGTAGTGTTCAGAGTAAT	7643	Hs.55304	GO:0003677|GO:0046872|GO:0003700|GO:0008270|GO:0006355|GO:0006351|GO:0005794|GO:0005622|GO:0005634|GO:0005634	NP_009069	Zinc finger protein 90
ASHG19A3A033273	0.00648064	2.5243	down	480.307	1250.46	8.84742	10.1833	448.667	404.137	507.837	1851.64	1263.93	1658.96	1029.1	580.763	644.42	350.065	394.621	9.562	8.48568	8.99376	10.6802	11.043	10.0227	9.60853	9.59408	9.4769	8.16585	8.36826	coding	NM_000702	ATP1A2	RefSeq_coding	5496	chr1	+	160085519	160113372		ACAGGATCTTTATTGGTGACCTTTTGTAAGACATTAGTTTGAGGTACTACCTATGTACTT	477	Hs.34114	GO:0005524|GO:0015662|GO:0019829|GO:0016787|GO:0016820|GO:0046872|GO:0015077|GO:0000166|GO:0005391|GO:0006754|GO:0015991|GO:0008344|GO:0034220|GO:0034220|GO:0040011|GO:0045822|GO:0045988|GO:0001504|GO:0006813|GO:0051481|GO:0008217|GO:0002087|GO:0006940|GO:0006942|GO:0002026|GO:0019229|GO:0006814|GO:0055085|GO:0008542|GO:0005901|GO:0005737|GO:0043197|GO:0005768|GO:0016021|GO:0005624|GO:0005792|GO:…	NP_000693	ATPase, Na+/K+ transporting, alpha 2 polypeptide
ASHG19A3A046488	0.0290344	1.57794	down	18.2137	27.91	4.07494	4.73298	14.3352	19.5657	20.3446	28.6656	38.0032	40.7056	17.8406	8.12715	12.204	25.7828	23.2581	4.66398	4.178	4.35692	4.85873	5.04942	4.91257	4.18021	3.23095	3.8293	4.49912	4.35536	coding	NM_006133	DAGLA	RefSeq_coding	5756	chr11	+	61447909	61514472		TTTAGAAAACAAGACAGACTCTCAGATGAAAGATCTGACAAGCACCGTGGCCAGTCACAG	747	Hs.241564	GO:0047372|GO:0016787|GO:0046872|GO:0004806|GO:0007596|GO:0016042|GO:0030168|GO:0016021|GO:0005886	NP_006124	Diacylglycerol lipase, alpha
ASHG19A3A045741	0.00283092	1.99398	down	17.3602	33.2667	4.0596	5.05525	22.8384	17.8521	17.8767	26.2076	42.6228	37.3848	37.2799	26.5827	12.4584	16.1884	13.2026	5.34109	4.04538	4.15378	4.73317	5.30576	4.80794	5.08829	4.94102	3.85809	3.83548	3.52386	coding	NM_001142349	SCN4B	RefSeq_coding	4516	chr11	-	118004093	118016184	NM_174934,	TAGGCTCTACTAAGGAGAAGATGAACAACATTTCCATTGTGCTGAGGGACCTGGAGTTCA	6330	Hs.65239	GO:0005244|GO:0005248|GO:0006811|GO:0006814|GO:0016021|GO:0005886|GO:0001518	NP_777594	Sodium channel, voltage-gated, type IV, beta
ASHG19A3A053419	0.00347453	1.75185	down	45.1812	75.8524	5.42392	6.2328	52.3161	44.5421	65.1671	98.2964	63.147	90.301	75.2015	30.3065	31.1429	58.68	41.2483	6.52954	5.32425	6.07733	6.56225	6.13845	5.93272	6.00105	5.13514	5.17395	5.65026	5.18261	coding	NM_032805	ZSCAN10	RefSeq_coding	2463	chr16	-	3138894	3142861		AGGCATTGCTTTCTGGCCTCAGCTATGTAATTAAAACGCCCGAAGTAAAATGGCCTTCTC	84891	Hs.334515	GO:0046872|GO:0043565|GO:0003700|GO:0016564|GO:0008270|GO:0006355|GO:0006351|GO:0016032|GO:0005622|GO:0005634	NP_116194	Zinc finger and SCAN domain containing 10
ASHG19A3A037413	0.00605538	2.0036	down	877.162	1836.44	9.68407	10.6867	1393.38	775.527	737.42	1599.15	658.173	3187.7	2343.8	600.802	1388.68	686.649	1073.89	11.1156	9.45251	9.52335	10.4865	10.0433	11.0209	10.767	9.64853	10.5691	9.12772	9.78314	coding	NM_001012419	ANKRD20A3	RefSeq_coding	3964	chr9	-	43089971	43133544		TTGGCAGGAAGAGAACATATTCTGCATCCCTCACTGAATTCAGTAATAAATAAAAATGTG	441425	Hs.632663		NP_001012419	Ankyrin repeat domain 20 family, member A3
ASHG19A3A054392	0.0403787	1.90548	down	41.0001	74.3614	5.18705	6.11721	82.2111	76.7037	29.4556	49.6482	49.6091	126.365	63.9735	16.1516	37.661	43.4352	42.5933	7.18008	6.08882	4.92598	5.61743	5.6298	6.36902	5.78969	4.20203	5.44465	5.23138	5.22943	coding	NM_022097	CHP2	RefSeq_coding	2391	chr16	+	23765947	23770256		GATGGGGCTTGATGCAGTAGGGAAGAGACGATGTAAAAATAATAAACAATATATACCTTC	63928	Hs.178589	GO:0005509|GO:0005737	NP_071380	Calcineurin B homologous protein 2
ASHG19A3A013779	0.00549005	1.75617	down	5	10.7603	2.35987	3.17231	5	5	5	6.06682	20.5733	9.77895	12.3824	5	5	5	5	2.53526	2.35386	2.35229	2.72381	3.70588	3.1447	3.75189	2.36059	2.39419	2.35107	2.34725	coding	NM_001001827	OR2T35	RefSeq_coding	972	chr1	-	248801587	248802559		ATCTACAGCTTGAGGAATAAAGATGTGGCTGCAGCTCTGAGGAAAGTACTAGGGAGATGT	403244	Hs.534846	GO:0004984|GO:0004872|GO:0050896|GO:0007608|GO:0016021|GO:0005886	NP_001001827	Olfactory receptor, family 2, subfamily T, member 35
ASHG19A3A011610	0.0140516	1.63589	down	84.7262	134.601	6.28223	6.9923	72.4017	80.8594	77.4731	96.2014	107.988	194.422	201.99	45.2674	71.4649	77.3395	155.953	6.99478	6.16294	6.33011	6.53396	7.15583	6.93266	7.34428	5.74101	6.36052	6.04054	7.05825	coding	NM_032040	CCDC8	RefSeq_coding	3336	chr19	-	46913586	46916919		TATAAGGTACAGTAAAAGCGTCTGAAAAATGCATTCAAAACACAGATTCTGGGGCCCTCG	83987	Hs.97876	GO:0005886	NP_114429	Coiled-coil domain containing 8
ASHG19A3A025219	0.0202455	1.57338	down	906.35	1600.04	9.77963	10.4335	965.791	923.777	977.999	1079.78	656.071	2122.73	3175.82	660.672	1043.25	873.527	958.875	10.6069	9.70068	9.92215	9.92485	10.0384	10.4003	11.1971	9.78906	10.1702	9.47823	9.6175	coding	NM_002448	MSX1	RefSeq_coding	1940	chr4	+	4861391	4865658		CATTTGTGTGGCTCTCAAACATCCCTTTGGAAGGGATTGTGTGTACTATGTAATATACTG	4487	Hs.424414	GO:0043565|GO:0003700|GO:0016564|GO:0030509|GO:0071445|GO:0030326|GO:0001837|GO:0030900|GO:0003007|GO:0001701|GO:0010463|GO:0030901|GO:0007275|GO:0007517|GO:0043066|GO:0008285|GO:0000122|GO:0042476|GO:0009887|GO:0010552|GO:0001501|GO:0005634	NP_002439	Msh homeobox 1
ASHG19A3A022216	0.00299244	1.90971	down	13.7182	25.6304	3.72063	4.65399	17.8654	14.6489	16.4812	21.6263	34.9607	18.7422	34.9576	12.3352	9.51032	10.6473	18.6864	4.99071	3.75523	4.02942	4.46363	4.8603	3.95025	5.00506	3.79992	3.47677	3.22473	4.03773	coding	NM_178033	CYP4X1	RefSeq_coding	2382	chr1	+	47489239	47516422		ATAATTTTCAAACTCAGCCCTCAGGGCTACCGCTTCCAGAAGTTAAGCCGAGTGTTGAAT	260293	Hs.439760	GO:0070330|GO:0009055|GO:0020037|GO:0046872|GO:0004497|GO:0016705|GO:0055114|GO:0005783|GO:0005789|GO:0016020|GO:0005792	NP_828847	Cytochrome P450, family 4, subfamily X, polypeptide 1
ASHG19A3A033548	0.00878349	1.96896	down	158.692	321.293	7.24213	8.21956	168.591	152.13	184.395	179.389	286.4	412.263	559.822	96.5925	210.128	153.8	155.109	8.18581	7.055	7.5613	7.40891	8.77551	7.9725	8.75508	6.87545	7.90191	7.00609	7.05303	coding	NM_138693	KLF14	RefSeq_coding	1509	chr7	-	130417396	130418888		GTCCAGGACTGGGATGGTGAGAGGCCTTTGGAAACAGAAATGATTTCTATTTCTGTAAAC	136259	Hs.125240	GO:0003677|GO:0046872|GO:0008270|GO:0005622|GO:0005634	NP_619638	Kruppel-like factor 14
ASHG19A3A031862	0.00743009	1.86897	down	6.48381	12.1332	2.61415	3.5164	8.27057	10.2669	8.63596	8.06161	18.4784	8.97951	16.876	5	5	5	5	3.88319	3.22645	3.00538	3.06884	3.46076	3.0538	4.1154	2.36059	2.39419	2.35107	2.34725	coding	NM_005604	POU3F2	RefSeq_coding	4172	chr6	+	99282579	99286665		AATACTTTGTTTTGGTACATTTGGTTGTGCTTGTGGGGAAAATAAAAACGCAGAGATCCT	5454	Hs.182505	GO:0042802|GO:0005515|GO:0043565|GO:0003700|GO:0030528|GO:0014002|GO:0021799|GO:0008544|GO:0021869|GO:0021979|GO:0022011|GO:0021985|GO:0030182|GO:0008284|GO:0040018|GO:0045944|GO:0050770|GO:0045595|GO:0006351|GO:0005634|GO:0005667	NP_005595	POU class 3 homeobox 2
ASHG19A3A053983	0.00149569	1.76449	down	41.3345	73.5343	5.28329	6.10254	38.9936	68.5215	28.3778	69.4513	56.1106	118.275	84.8409	31.8297	34.9723	49.5806	34.7252	6.10471	5.92876	4.86806	6.08278	5.88447	6.27638	6.16438	5.21148	5.33746	5.41466	4.93934	coding	NM_004483	GCSH	RefSeq_coding	1538	chr16	-	81115551	81129980	NR_033249,	CAGGTTTCCACTTAAGTCATGGGAATAAAAGTGGACAAGGACTGAAGCTTTATGAGCTCA	2653	Hs.546256	GO:0004047|GO:0006546|GO:0019464|GO:0005960|GO:0005739	NP_004474	Glycine cleavage system protein H (aminomethyl carrier)
ASHG19A3A055014	0.0172721	2.00889	down	256.099	504.078	7.95344	8.95984	289.498	242.888	199.014	395.403	733.848	491.92	609.723	298.78	200.082	259.729	336.1	8.96378	7.75134	7.664	8.51976	10.2175	8.22622	8.87195	8.58375	7.83196	7.75134	8.13825	coding	NM_001170699	SPATA22	RefSeq_coding	1559	chr17	-	3343307	3375067		CCAATGCCACCAACCCCATTACTAACGCCACTTAGGTCCATTTGGGAGCTGGGATTGGGG	84690	Hs.351068		NP_115987	Spermatogenesis associated 22
ASHG19A3A032381	0.0168578	1.92198	down	6.37377	13.4363	2.66494	3.60753	7.1385	9.41742	5.60567	5.45827	28.9088	13.2276	12.4482	5	8.11484	5	5.10467	3.68424	3.1081	2.50111	2.61995	4.45193	3.52329	3.75825	2.36059	3.25324	2.35107	2.41552	coding	NM_006869	ADAP1	RefSeq_coding	2338	chr7	-	937537	994289		AGCCGGAAGTTTGTGCTGACAGAACGAGAGGGTGCTCTGAAGTATTTCAACAGAAATGAT	11033	Hs.602573	GO:0008060|GO:0043533|GO:0046872|GO:0005547|GO:0005515|GO:0008270|GO:0007166|GO:0032312|GO:0043087|GO:0005737|GO:0005634|GO:0005886	NP_006860	ArfGAP with dual PH domains 1
ASHG19A3A011639	0.028993	1.61669	down	6.5927	11.775	2.61285	3.30589	5	8.57221	5	8.46293	24.5555	9.88122	10.9756	5	5	7.332	8.65202	2.53526	2.98072	2.35229	3.13577	4.09463	3.15739	3.60639	2.36059	2.39419	2.7135	2.87581	coding	NM_003167	SULT2A1	RefSeq_coding	1987	chr19	-	48373722	48389654		TGGATGCCCATGAGAGAGGAGAAAAACTTCCTGTTACTGAGTTATGAGGAGCTGAAACAG	6822	Hs.515835	GO:0047704|GO:0008146|GO:0008146|GO:0016740|GO:0050427|GO:0030573|GO:0044255|GO:0007586|GO:0008202|GO:0051923|GO:0006805|GO:0005737|GO:0005829|GO:0005829	NP_003158	Sulfotransferase family, cytosolic, 2A, dehydroepiandrosterone (DHEA)-preferring, member 1
ASHG19A3A009103	0.0403036	1.60848	down	15.9266	24.7837	3.94796	4.63366	16.3834	15.9666	17.0822	26.5194	42.295	21.1635	17.5574	22.5604	14.0901	13.6783	12.1817	4.86198	3.88333	4.08372	4.74833	5.28961	4.10786	4.1605	4.69559	4.03346	3.59666	3.39499	coding	NM_004822	NTN1	RefSeq_coding	5954	chr17	+	8924858	9147316		GCAAGGCCTCCAAGGGGAAGCTGAAGATTAACATGAAAAAGTACTGCAAGAAGGACTATG	9423	Hs.660885	GO:0005515|GO:0006915|GO:0007411|GO:0016337|GO:0040023|GO:0030879|GO:0060603|GO:0030517|GO:0001764|GO:0045773|GO:0008284|GO:0030334|GO:0005604|GO:0005737|GO:0005576|GO:0005576	NP_004813	Netrin 1
ASHG19A3A046935	0.0144288	2.52454	down	242.995	669.431	7.88311	9.21913	366.968	196.103	316.337	388.174	775.801	410.248	1405.96	269.449	208.681	222.701	244.701	9.29751	7.42546	8.33009	8.49784	10.2981	7.96596	10.0363	8.4298	7.89213	7.53462	7.68657	coding	NM_001136105	C11orf93	RefSeq_coding	1414	chr11	+	111169975	111179353		ATTTCCAATTTTCTGATGCTAAGCATTCATATGAAGTCCTCAGACCCGGTCACAGCGCCA	120376	Hs.31409		NP_001129577	Chromosome 11 open reading frame 93
ASHG19A3A034791	0.0411878	1.65787	down	5.25059	11.5222	2.4054	3.13473	5	5	5.01797	7.05729	24.5234	16.0303	5	5	5	5	6.48556	2.53526	2.35386	2.43665	2.89352	4.09052	3.76285	2.3915	2.36059	2.39419	2.35107	2.53606	coding	NM_006902	PRRX1	RefSeq_coding	4071	chr1	+	170633312	170708540		CCCAAGATGTTGTTTACACGAGGGGCTTCATAACGGATTCTAACGGAAGACACTGAAAAG	5396	Hs.283416	GO:0043565|GO:0003700|GO:0003713|GO:0016564|GO:0048844|GO:0051216|GO:0048701|GO:0030326|GO:0042472|GO:0042474|GO:0007275|GO:0000122|GO:0060021|GO:0002053|GO:0045880|GO:0006355|GO:0005634	NP_073207	Paired related homeobox 1
ASHG19A3A042057	0.0234886	2.6394	down	10.3036	31.2244	3.31074	4.71095	19.0401	5.00082	13.4126	43.6002	32.4621	6.74987	54.2695	12.7049	8.8261	9.92474	11.9525	5.08313	2.44834	3.71078	5.44218	4.7024	2.75112	5.57591	3.84369	3.36682	3.12807	3.36672	coding	NM_001164471	TSPY4	RefSeq_coding	1156	chrY	+	9195451	9218479	NM_003308,	CTTATGCACAGGAACTAAAGGAAAAAGAGATCGAGTCACAAAAATTCAGGAAGAGGGGGT	7258	Hs.556121	GO:0042802|GO:0003674|GO:0005515|GO:0030154|GO:0008283|GO:0007506|GO:0007275|GO:0006334|GO:0007548|GO:0007283|GO:0005575|GO:0005737|GO:0005634	NP_003299	Testis specific protein, Y-linked 1
ASHG19A3A003826	0.0167615	1.66503	down	17.896	29.9415	4.11884	4.85439	17.1808	17.9501	12.2326	41.6751	34.0332	22.0658	34.7527	18.3805	22.2233	17.1574	19.4318	4.93471	4.05394	3.55946	5.37999	4.80362	4.15623	4.99738	4.39183	4.6882	3.92521	4.0944	coding	NM_001178077	ASNS	RefSeq_coding	1709	chr7	-	97481429	97501477		AGGAGGCAGCGGCAGTTTGAGCCCCTATGCAACAGCATTTTGAATTTGAATACCAGACCA	440	Hs.489207	GO:0005524|GO:0004066|GO:0004066|GO:0048037|GO:0016874|GO:0000166|GO:0042803|GO:0006529|GO:0006529|GO:0008652|GO:0034641|GO:0042149|GO:0032870|GO:0006541|GO:0001889|GO:0008152|GO:0043066|GO:0045931|GO:0043200|GO:0032354|GO:0009416|GO:0009612|GO:0031427|GO:0031667|GO:0009636|GO:0005829|GO:0005625	NP_899199	Asparagine synthetase (glutamine-hydrolyzing)
ASHG19A3A009890	0.0398254	2.07134	down	14.2827	27.4913	3.63343	4.684	10.6127	28.4271	15.2576	21.2365	48.2806	22.4263	34.9005	14.5961	6.06214	15.4893	5.86372	4.22679	4.69408	3.91139	4.44057	5.57461	4.17509	5.00294	4.04538	2.90257	3.77578	2.47139	coding	NM_001100622	C17orf80	RefSeq_coding	2100	chr17	+	71228775	71241483		TGCAATACATACTTAACAGTTTAAAAATGTATAATATTTGGGACAGGGAGAGGGGAGTGA	55028	Hs.12929	GO:0016021|GO:0016020	NP_060411	Chromosome 17 open reading frame 80
ASHG19A3A041063	0.0106655	2.04788	down	5476.9	10824.2	12.2702	13.3044	5735.53	7044.37	8418.79	8033.13	9733.65	11799.4	18819.5	2054.38	5141.49	4510.25	5692.12	12.9962	12.6558	13.0154	12.7857	13.9762	13.023	13.7407	11.509	12.3874	11.8727	12.1811	coding	NM_033131	WNT3A	RefSeq_coding	2932	chr1	+	228194751	228248961		AAATTCTGCGTTTTTGGTTTTAATGTTATATCTGATGCTGCTATATCCACTGTCCAACGG	89780	Hs.336930	GO:0005201|GO:0005109|GO:0005110|GO:0005515|GO:0048018|GO:0004871|GO:0003713|GO:0021874|GO:0007223|GO:0009653|GO:0090245|GO:0009798|GO:0007411|GO:0007409|GO:0060070|GO:0021846|GO:0007267|GO:0034613|GO:0071300|GO:0060026|GO:0061054|GO:0007368|GO:0021904|GO:0009880|GO:0030198|GO:0001947|GO:0071425|GO:0021766|GO:0001701|GO:0042472|GO:0030879|GO:0007498|GO:0030917|GO:0007275|GO:0048843|GO:0045599|GO:…	NP_149122	Wingless-type MMTV integration site family, member 3A
ASHG19A3A027507	0.00936084	1.64927	down	5.40352	10.4017	2.43355	3.15538	5	5	5.18787	10.7934	22.1535	6.74788	7.31387	5	5	5.80674	6.42653	2.53526	2.35386	2.45571	3.46873	3.86639	2.75042	3.15609	2.36059	2.39419	2.50682	2.53015	coding	NM_022481	ARAP3	RefSeq_coding	5281	chr5	-	141032968	141061800		AAACTATGTCTTCCAGAGACGCTTTGTGCAGTTCAATGGGAGGAGTCTGATGTACTTTGG	64411	Hs.726187	GO:0008060|GO:0005096|GO:0030675|GO:0005100|GO:0046872|GO:0005547|GO:0043325|GO:0008270|GO:0007010|GO:0035021|GO:0035024|GO:0030336|GO:0032312|GO:0008360|GO:0051056|GO:0007165|GO:0007264|GO:0016192|GO:0005737|GO:0005737|GO:0005856|GO:0005829|GO:0005622|GO:0030027|GO:0005886|GO:0001726	NP_071926	ArfGAP with RhoGAP domain, ankyrin repeat and PH domain 3
ASHG19A3A040704	0.0483741	1.82883	down	6.4557	13.2219	2.67417	3.54509	9.12825	5.77811	7.92104	13.3352	10.0716	7.65126	25.923	5	6.94958	5.10536	7.98012	4.02031	2.53806	2.87687	3.76661	2.41761	2.87887	4.64206	2.36059	3.07069	2.43462	2.76418	coding	NM_203281	BMX	RefSeq_coding	2592	chrX	+	15518899	15574651		ATGTAGCCATTTCTGACCCGGCAGCCAGGAAAATGTGAAACAATTTGCTTCTGGAAACAG	660	Hs.495731	GO:0005524|GO:0046872|GO:0004715|GO:0000166|GO:0005515|GO:0004713|GO:0004871|GO:0006915|GO:0006921|GO:0035556|GO:0007498|GO:0006468|GO:0007165|GO:0005737|GO:0005829	NP_975010	BMX non-receptor tyrosine kinase
ASHG19A3A031286	0.0170533	1.81601	down	187.029	323.633	7.50658	8.36735	224.219	203.828	181.973	315.034	372.575	302.242	404.098	216.559	161.448	143.019	215.349	8.60346	7.48121	7.54196	8.20146	9.18638	7.55043	8.29503	8.09301	7.51084	6.90523	7.50722	coding	NM_001011700	MCCD1	RefSeq_coding	709	chr6	+	31496738	31498008		ATGCCCTAAAATAACCTCACCCCAAATACAATAAAGGGACGAAGCACTTATAGATACCAC	401250	Hs.558922	GO:0005739	NP_001011700	Mitochondrial coiled-coil domain 1
ASHG19A3A039649	0.0284273	2.04851	down	12.9594	27.114	3.60651	4.64109	10.125	7.24473	14.2456	19.0212	50.5884	20.517	35.3182	14.0883	16.8367	8.36764	16.9732	4.15915	2.75556	3.808	4.28987	5.67087	4.06749	5.01806	3.99319	4.28861	2.89086	3.90285	coding	NM_000330	RS1	RefSeq_coding	3040	chrX	-	18657809	18690223		AGTATCCTAAGAGTTAAGGCACATCAAACACAGGAGTCGAGAGAGTGCAGTTCAGGGAAA	6247	Hs.715725	GO:0007155|GO:0007275|GO:0050896|GO:0007601|GO:0005576|GO:0005615	NP_000321	Retinoschisin 1
ASHG19A3A054816	0.00234773	3.88556	down	60.4914	220.927	5.65153	7.60966	147.157	25.0253	36.2027	165.322	100.269	270.203	421.685	29.6162	98.8365	55.4311	117.836	7.9991	4.52193	5.23174	7.29324	7.01364	7.3871	8.3552	5.0996	6.81164	5.57099	6.67331	coding	NM_130791	WWOX	RefSeq_coding	735	chr16	+	78133550	78312593		CCCTCCGCCAGAAAAGTGCAGAATAAAAATTTTCCACTAGCAAAAGAAGGAAAAAATAAA	51741	Hs.461453	GO:0050662|GO:0048037|GO:0016491|GO:0016491|GO:0005515|GO:0046983|GO:0006915|GO:0006917|GO:0030178|GO:0001649|GO:0055114|GO:0048705|GO:0008202|GO:0005794|GO:0005737|GO:0005737|GO:0005739|GO:0005634	NP_570859	WW domain containing oxidoreductase
ASHG19A3A039348	0.020587	1.80794	down	412.169	810.17	8.60994	9.46429	217.963	543.288	430.169	539.319	791.473	1392.45	1109.64	250.259	379.133	386.218	483.949	8.56535	8.90836	8.75508	8.95223	10.3303	9.75376	9.71983	8.31701	8.73473	8.29852	8.64596	coding	NM_006059	LAMC3	RefSeq_coding	6107	chr9	+	133884503	133968446		TTCCTCCAGTGCCAAGAAGAAGGGCAGAGAAGCAGAGGTGTTGGCCAAGGACAGTGCCAA	10319	Hs.201805	GO:0005198|GO:0007155|GO:0005604|GO:0005576|GO:0016020|GO:0005578	NP_006050	Laminin, gamma 3
ASHG19A3A047197	0.047668	1.51981	down	82.6465	127.301	6.30526	6.90915	49.2792	97.8106	87.5661	181.838	125.21	172.789	107.387	49.0379	100.661	66.8207	93.9831	6.44853	6.42994	6.50996	7.42956	7.4149	6.779	6.47376	5.86551	6.83964	5.83504	6.35145	coding	NM_031474	NRIP2	RefSeq_coding	2787	chr12	-	2934514	2944221		AGAGGGCTCACTTATCACTTGTGCCATAGCACCTGGTCTCAAAATCCTAAAAGCTTTCCT	83714	Hs.530816	GO:0004190|GO:0030528|GO:0000122|GO:0006508|GO:0005737|GO:0005634	NP_113662	Nuclear receptor interacting protein 2
ASHG19A3A011010	0.0475117	2.05297	down	13.8782	21.4741	3.35636	4.39407	14.7789	16.2332	8.69107	19.7048	25.0627	25.593	22.2312	5	5	35.1123	13.2324	4.7075	3.90728	3.01547	4.33686	4.1368	4.339	4.45021	2.36059	2.39419	4.93277	3.52789	coding	NM_152476	ZNF560	RefSeq_coding	2802	chr19	-	9577030	9609279		AGTGTCATCTCTTGGTTGGAAGAAGAAGAGTTGAGAACCTTGCAGCAAGGAGTTCTCCAA	147741	Hs.631613	GO:0003677|GO:0046872|GO:0008270|GO:0006355|GO:0005622|GO:0005634	NP_689689	Zinc finger protein 560
ASHG19A3A025247	0.0151655	1.96377	down	700.334	1357.87	9.25966	10.2333	608.472	585.874	561.13	1002.87	854.978	1540.49	2782.56	245.721	748.701	1084.53	976.05	9.97719	9.02623	9.13772	9.81998	10.4432	9.91356	11.0124	8.28802	9.68183	9.7803	9.64383	coding	NM_053044	HTRA3	RefSeq_coding	2585	chr4	+	8271491	8308830		TGTTGCTTGTACTGTATGTTTCTCTACTGTATGGAAAATAAAGTTTACAAGCACACGGTT	94031	Hs.479119	GO:0005520|GO:0008233|GO:0004252|GO:0006508|GO:0001558|GO:0005576	NP_444272	HtrA serine peptidase 3
ASHG19A3A004383	0.0300674	2.27868	down	9.79088	21.8711	3.13767	4.32587	14.2094	5.64102	9.24809	11.2255	40.5762	11.7504	31.5942	10.6786	6.43759	21.74	5	4.65185	2.521	3.10912	3.52386	5.19681	3.37623	4.88063	3.60286	2.98026	4.26555	2.34725	coding	NM_005277	GPM6A	RefSeq_coding	3021	chr4	-	176554088	176923648		AGAGAAGCAGGACCTCGGGCCATGGATTCTACTGAAGAAAGGTAGCCATGGAAGAGAATA	2823	Hs.728134	GO:0005262|GO:0009986|GO:0016021|GO:0016020	NP_963886	Glycoprotein M6A
ASHG19A3A002017	0.0294764	2.09002	down	13.3169	23.3877	3.43109	4.4946	12.8851	14.3104	12.8621	16.3609	36.188	23.4339	28.0706	5	5	20.2506	22.4783	4.5044	3.7192	3.64023	4.07159	4.93422	4.2277	4.73511	2.36059	2.39419	4.16334	4.309	coding	NM_001127461	NLRP3	RefSeq_coding	4333	chr1	+	247579457	247612404		AGCTGTTCCTGAGGCTGGCATCTGGATGAGGAAACTGAAGTTGAGGAATAGTGAAGAGTT	114548	Hs.159483	GO:0005524|GO:0000166|GO:0042834|GO:0005515|GO:0006915|GO:0006952|GO:0009595|GO:0006917|GO:0006954|GO:0042347|GO:0032088|GO:0043280|GO:0050718|GO:0051259|GO:0007165|GO:0005737|GO:0005737	NP_899632	NLR family, pyrin domain containing 3
ASHG19A3A052410	0.0278073	1.66641	down	3502.8	5704.49	11.7061	12.4428	3442.3	2822.08	5290.65	6649.2	5809.71	5161.1	7460.11	2731.6	3342.16	2986.82	3843.5	12.3202	11.3252	12.3259	12.4995	13.2561	11.7653	12.373	11.9365	11.7865	11.262	11.6004	coding	NM_001897	CSPG4	RefSeq_coding	8305	chr15	-	75966663	76005189		GGCTAGGTCCTCTACAAAGAGCTGCAAGACAAAAATTAAAATAAATGCTCCCCACCCTAG	1464	Hs.513044	GO:0019901|GO:0004871|GO:0001525|GO:0030154|GO:0035556|GO:0007275|GO:0050731|GO:0048771|GO:0016324|GO:0042995|GO:0009986|GO:0005887|GO:0031258|GO:0005886	NP_001888	Chondroitin sulfate proteoglycan 4
ASHG19A3A003491	0.0204988	1.58378	down	16.9913	26.6469	4.03264	4.69601	12.5392	22.279	19.668	30.0653	42.5174	20.8484	27.2642	16.388	10.7187	18.8103	14.0836	4.46634	4.35466	4.30069	4.92295	5.30091	4.09078	4.69909	4.22157	3.64063	4.05738	3.62091	coding	NM_001168647	CNKSR2	RefSeq_coding	5679	chrX	+	21392535	21672812		AGACGAGAAAGCACCCCAACTTATGAAAACTCTCTACTTCGGTATATGAGCAATGAAAAG	22866	Hs.555917	GO:0005515|GO:0009966|GO:0005737|GO:0016020	NP_055742	Connector enhancer of kinase suppressor of Ras 2
ASHG19A3A018520	0.0243212	1.61429	down	19.9102	34.7487	4.27991	4.97081	13.599	17.7054	21.0787	20.2495	44.1121	50.6913	45.0919	22.5094	19.0285	25.0815	14.0577	4.58458	4.03206	4.40919	4.3737	5.38137	5.18298	5.33142	4.69273	4.46722	4.4611	3.61716	coding	NM_177980	CDH26	RefSeq_coding	3193	chr20	+	58533470	58588167		TATCCAATGATGAAGGCCACCAAACACTGGTCATGTATAATGCGGAGAGCAAAGGCACTT	60437	Hs.729046	GO:0005509|GO:0007155|GO:0007156|GO:0016021|GO:0005886	NP_817089	Cadherin 26
ASHG19A3A016815	0.0372475	1.87965	down	13.5482	25.2499	3.62594	4.53641	11.0798	8.21735	13.2575	36.2461	35.5376	12.7454	30.6407	13.2085	6.52454	16.6009	23.4802	4.28728	2.91839	3.69448	5.18055	4.89655	3.47558	4.84208	3.90053	2.9997	3.87321	4.36936	coding	NM_033358	CASP8	RefSeq_coding	1123	chr2	+	202098165	202146638		TGGCAATAAATATTAGAAGCCTGCAGAATCCAGCTACGAATATAGAGGGTTTTGCTCTTG	841	Hs.599762	GO:0004197|GO:0008234|GO:0042802|GO:0008233|GO:0005515|GO:0006919|GO:0008633|GO:0008633|GO:0006915|GO:0006915|GO:0006921|GO:0071260|GO:0008624|GO:0008624|GO:0008624|GO:0008629|GO:0043123|GO:0006508|GO:0051603|GO:0042981|GO:0034612|GO:0005813|GO:0005737|GO:0005856|GO:0005829|GO:0005829|GO:0031264|GO:0005741|GO:0005739|GO:0005730|GO:0005634	NP_203522	Caspase 8, apoptosis-related cysteine peptidase
ASHG19A3A039459	0.0360711	1.773	down	26279.7	42619.6	14.5198	15.346	24877.4	25095.3	24505.6	45642	41455.3	42791.2	58332.1	15552.2	52482.4	14955.8	25086.8	15.0084	14.5367	14.5746	15.324	15.9576	15.03	15.4098	14.4187	15.6561	13.6089	14.3237	coding	NM_016215	EGFL7	RefSeq_coding	1569	chr9	+	139557381	139567129		CTGGGTGGGGCCTCAGTGGGGGCTGCTGCCTGACCCCCAGCACAATAAAAATGAAACGTG	51162	Hs.91481	GO:0005509|GO:0001525|GO:0001568|GO:0007275|GO:0030336|GO:0001570|GO:0005576|GO:0005615	NP_958854	EGF-like-domain, multiple 7
ASHG19A3A052749	0.0407822	2.34779	down	10.977	33.4583	3.30952	4.54082	10.6728	10.1867	9.73382	23.9953	36.6425	89.9086	6.07231	5	16.5511	11.9627	12.4277	4.23456	3.21611	3.18185	4.6097	4.96556	5.92646	2.96783	2.36059	4.26404	3.40621	3.42832	coding	NM_152453	TMCO5A	RefSeq_coding	1186	chr15	+	38227456	38243622		TCACAAAAGATAACCAATTGTGAACAAAGCAGTCCAGATGGAGCCCTAGAAGAGACAAAG	145942	Hs.179646	GO:0016021|GO:0016020	NP_689666	Transmembrane and coiled-coil domains 5A
ASHG19A3A037803	0.0102616	1.54368	down	16.6215	26.2974	3.9977	4.62407	19.0196	21.5591	14.9883	18.7905	26.0836	43.5309	24.0626	11.8706	12.8909	21.9529	16.4675	5.08186	4.31202	3.88547	4.27234	4.22306	4.99728	4.54579	3.74754	3.90534	4.27893	3.85689	coding	NM_173551	ANKS6	RefSeq_coding	7147	chr9	-	101494291	101558794		TGAAATATCTGCTAAACCAAGGGGCCGATGTCACTCTTCGTGCAAAAAATGGATACACGG	203286	Hs.406890	GO:0042803|GO:0005737	NP_775822	Ankyrin repeat and sterile alpha motif domain containing 6
ASHG19A3A047886	0.0237821	2.40109	down	7.93525	19.681	2.87647	4.14015	10.4719	12.8673	6.35724	13.6043	51.5328	11.4422	11.3538	11.7897	5	6.59728	5	4.20609	3.56043	2.60899	3.79432	5.70632	3.34328	3.65075	3.73752	2.39419	2.61042	2.34725	coding	NM_001025232	CLLU1OS	RefSeq_coding	686	chr12	-	92813869	92821924		CTCTGCATATGTGAGAGCGGGCAAAGGAAATGTGACAAGGAGAAGAAAGAAGACACACTT	574016	Hs.551199		NP_001020403	Chronic lymphocytic leukemia up-regulated 1 opposite strand
ASHG19A3A051797	0.0310675	2.05551	down	512.808	1315.29	8.91018	9.94968	494.327	576.305	308.756	536.479	532.987	3370.4	1642.25	444.633	786.834	565.992	394.327	9.69792	8.99782	8.29322	8.94544	9.72654	11.1188	10.2597	9.18789	9.7606	8.85402	8.36752	coding	NM_001362	DIO3	RefSeq_coding	2120	chr14	+	102027687	102029789		TTGGGGTGTCTGCTTTGGGACCAGAGGAAGATAGCTTGAGAGGCATTGGCGAGGTTCGCA	1735	Hs.49322	GO:0004800|GO:0004800|GO:0033798|GO:0008150|GO:0034641|GO:0042446|GO:0055114|GO:0005768|GO:0010008|GO:0016021|GO:0005886	NP_001353	Deiodinase, iodothyronine, type III
ASHG19A3A042329	0.0398683	1.84613	down	51.0765	90.9816	5.64187	6.52638	63.4541	49.4457	43.8564	77.9288	140.532	64.1651	108.828	73.1621	45.8648	42.3484	51.7818	6.80576	5.46669	5.51061	6.24052	7.60603	5.48663	6.49296	6.4495	5.72537	5.19637	5.50271	coding	NM_001013355	OR2G6	RefSeq_coding	951	chr1	+	248684947	248685898		AAACCCCATTATCTACACTCTGAGAAACAAAGATGTGAAAGGGGCCTTGAGGACCCTGAT	391211	Hs.553784	GO:0004984|GO:0004872|GO:0050896|GO:0007608|GO:0016021|GO:0005886	NP_001013373	Olfactory receptor, family 2, subfamily G, member 6
ASHG19A3A023640	0.0192422	2.26026	down	5.28831	13.1611	2.406	3.58249	20.2483	5	5	5	20.1901	10.7251	9.64231	5	5	6.72984	5	5.17231	2.35386	2.35229	2.3662	3.66237	3.2544	3.45718	2.36059	2.39419	2.62785	2.34725	coding	NM_001172818	PGM1	RefSeq_coding	2573	chr1	+	64088886	64125914		GATGGGCGGTACTTTAATAAATCAGCAATAGAAACAATAGTGCAGATGGCAGCTGCCAAT	5236	Hs.1869	GO:0016853|GO:0000287|GO:0004614|GO:0005975|GO:0006874|GO:0019388|GO:0019255|GO:0006006|GO:0006006|GO:0005978|GO:0005978|GO:0005980|GO:0005737|GO:0005829|GO:0005829	NP_002624	Phosphoglucomutase 1
ASHG19A3A024955	0.013468	1.95587	down	6.49387	14.877	2.66008	3.62789	5	7.32399	5	13.3411	29.7383	14.9468	11.3587	5	6.27301	9.32698	6.03923	2.53526	2.76985	2.35229	3.76791	4.51011	3.67488	3.65128	2.36059	2.94898	3.03961	2.48916	coding	NM_017631	DDX60	RefSeq_coding	6099	chr4	-	169137442	169239958		AAATGGTGGGGTTAACTGCTTGCTTGAAAGCCTGGAAAGAACATTGCCGAAGTGAAGAAG	55601	Hs.591710	GO:0005524|GO:0008026|GO:0003723|GO:0004386|GO:0016787|GO:0000166	NP_060101	DEAD (Asp-Glu-Ala-Asp) box polypeptide 60
ASHG19A3A003867	0.0218986	1.86243	down	10.2093	17.667	3.11931	4.01649	6.03144	16.9606	8.68524	20.3057	22.9128	20.9727	18.1125	5	5	12.5355	13.0743	3.46974	3.96919	3.01517	4.37842	3.94023	4.0965	4.19757	2.36059	2.39419	3.47011	3.50659	coding	NM_001184705	HADH	RefSeq_coding	2037	chr4	+	108910869	108956330		TTCTAACTCGGGTTTGGGCTTTTCTTTAAAAGGTGACGCATCCAAAGAAGACATTGACAC	3033	Hs.438289	GO:0003857|GO:0003857|GO:0070403|GO:0005488|GO:0050662|GO:0016491|GO:0044255|GO:0006635|GO:0006631|GO:0046676|GO:0055114|GO:0014823|GO:0042493|GO:0009725|GO:0032868|GO:0005737|GO:0005743|GO:0005759|GO:0005759|GO:0005739	NP_005318	Hydroxyacyl-CoA dehydrogenase
ASHG19A3A036399	0.0305743	1.51924	down	20.2623	31.212	4.30807	4.91142	25.6826	22.7872	18.5671	33.8577	25.9185	37.7933	32.8079	25.4508	14.7418	21.6918	18.3351	5.51101	4.38896	4.21394	5.08617	4.21104	4.82226	4.92659	4.87524	4.09729	4.26271	4.01027	coding	NM_000015	NAT2	RefSeq_coding	1317	chr8	+	18248754	18258723		AGCACTTTATTACAGACCTTGGAAGCAAGAGGATTGCATTCAGCCTAGTTCCTGGTTGCT	10	Hs.2	GO:0016407|GO:0004060|GO:0016740|GO:0008152|GO:0006805|GO:0005737|GO:0005829|GO:0005829	NP_000006	N-acetyltransferase 2 (arylamine N-acetyltransferase)
ASHG19A3A015073	0.00586886	1.70162	down	19.4258	31.6029	4.23016	4.99707	22.0257	25.679	24.9871	28.359	42.2092	32.343	33.0776	16.0551	16.9676	13.1967	19.6692	5.29118	4.55742	4.67306	4.84311	5.28516	4.62843	4.93747	4.19213	4.30028	3.54787	4.11022	coding	NM_015215	CAMTA1	RefSeq_coding	8457	chr1	+	6845383	7829763		AACACATTATTGAAGCCACACCTGACCGAATCAAGCAGGAGAATTTTGTGCCCATGGAGT	23261	Hs.397705	GO:0005516|GO:0030528|GO:0005737|GO:0005634	NP_056030	Calmodulin binding transcription activator 1
ASHG19A3A052272	0.0235369	1.61959	down	4809.42	8084.41	12.1991	12.8947	5082.05	4873.76	5978.15	8644.12	6153.33	6503.17	14039.4	4417.64	4391.34	3854.95	5340.69	12.8348	12.1288	12.5132	12.8866	13.3395	12.1115	13.301	12.64	12.1865	11.6404	12.0853	coding	NM_016563	RASL12	RefSeq_coding	2603	chr15	-	65345674	65360388		ATCTGAACAAACTATGCAATACCACCTGCTCCCTTCCAGGAGCATTTTAATAAAAGATTT	51285	Hs.27018	GO:0005525|GO:0003924|GO:0000166|GO:0007165|GO:0007264|GO:0016020	NP_057647	RAS-like, family 12
ASHG19A3A046094	0.0354512	1.63684	down	36.7395	57.8402	5.16876	5.87967	36.3919	39.258	33.0661	63.8071	86.2329	55.4759	47.2931	42.7109	33.2784	26.0339	46.0895	6.0039	5.14727	5.09798	5.96577	6.73612	5.30118	5.3914	5.64721	5.27172	4.51435	5.33404	coding	NM_001004489	OR2AG1	RefSeq_coding	998	chr11	+	6806247	6807243		AAATTCTACTCACTGTGCTCCATATGCCATCAAATGAGGGGAGGAAGAAAGCCCTTGTCA	144125	Hs.553608	GO:0004984|GO:0004872|GO:0050896|GO:0007608|GO:0016021|GO:0005886	NP_001004489	Olfactory receptor, family 2, subfamily AG, member 1
ASHG19A3A048938	0.0340872	1.98849	down	11.8823	21.9478	3.41481	4.40648	16.5059	12.3585	11.1042	27.4235	34.7981	9.31037	21.7011	5	10.2826	18.7063	13.8423	4.87267	3.50292	3.39617	4.79471	4.85046	3.09315	4.42143	2.36059	3.58415	4.05033	3.59471	coding	NM_152435	AMDHD1	RefSeq_coding	2143	chr12	+	96337070	96362369		TTTGGTGGATGCACACACACATCCAGTATGGGCTGGTGAAAGAGTTCACGAATTTGCAAT	144193	Hs.424907	GO:0016812|GO:0050480|GO:0046872|GO:0034641|GO:0006548|GO:0019556|GO:0005737|GO:0005829	NP_689648	Amidohydrolase domain containing 1
ASHG19A3A015402	0.0399816	1.66893	down	184.116	325.287	7.42291	8.16184	206.472	177.932	114.955	244.124	145.732	374.418	655.69	112.305	265.255	233.389	200.862	8.48883	7.28362	6.90326	7.83099	7.66301	7.8457	8.98066	7.10069	8.24033	7.60166	7.40793	coding	NM_052960	RBP7	RefSeq_coding	704	chr1	+	10057254	10076077		TTGGTTATCTGGGACAATGACAGGCTCACCTGTATCCAGAAGGGAGAAAAGAAGAACAGA	116362	Hs.422688	GO:0008289|GO:0016918|GO:0019841|GO:0005215|GO:0005737	NP_443192	Retinol binding protein 7, cellular
ASHG19A3A047070	0.0245627	2.09892	down	9.1646	19.3048	3.12494	4.19459	15.5571	5.32127	15.1929	10.8612	39.3375	20.795	9.9731	5.51206	11.2555	7.48907	10.2169	4.78262	2.48578	3.90406	3.47767	5.13115	4.08613	3.49539	2.78741	3.71489	2.73856	3.11897	coding	NM_001004462	OR10G4	RefSeq_coding	936	chr11	+	123886281	123887215		AGGAGGTGAAGAAAGCTGTGTTGAAACTTAGAGACAAAGTAGCACATCCTCAGAGGAAAT	390264	Hs.553760	GO:0004984|GO:0004872|GO:0050896|GO:0007608|GO:0016021|GO:0005886	NP_001004462	Olfactory receptor, family 10, subfamily G, member 4
ASHG19A3A048206	0.00800677	2.10848	down	29.2164	68.4979	4.81365	5.88985	24.0581	29.5311	33.5515	108.357	44.9438	70.0529	95.0773	19.0113	42.7535	24.9479	25.5033	5.4149	4.74705	5.12003	6.6961	5.4226	5.60409	6.31156	4.44246	5.62275	4.4544	4.4952	coding	NM_001170738	IQSEC3	RefSeq_coding	6976	chr12	+	176048	287623		CCCAGCAACTAATCCAAATGGCAAATATTTTGTAACAAAATAGCCCAGAGGTATTTTATC	440073	Hs.536319	GO:0005086|GO:0032012|GO:0005737|GO:0005622	NP_056047	IQ motif and Sec7 domain 3
ASHG19A3A049031	0.00184116	2.3735	down	8.29811	19.3149	3.00014	4.24716	14.021	6.43356	9.98639	17.6884	36.9335	17.1038	10.8278	8.33685	5.58644	12.7822	6.66319	4.63108	2.63319	3.22355	4.18509	4.98272	3.84547	3.59145	3.26891	2.81173	3.49871	2.56478	coding	NM_032300	TCHP	RefSeq_coding	3172	chr12	+	110338322	110355873		AACTTTTAACTCTTGGTGCAAAGACTGATCCACTGGCGGCTTTACGGGAGCGGGAAAAAA	84260	Hs.410924	GO:0005515|GO:0006915|GO:0030308|GO:0045179|GO:0005737|GO:0005856|GO:0045095|GO:0005739|GO:0005886	NP_115676	Trichoplein, keratin filament binding
ASHG19A3A009012	0.0478659	1.74403	down	96.6227	161.534	6.38146	7.18389	108.544	63.5285	74.717	113.456	86.3986	191.989	307.284	61.7707	50.097	123.088	206.535	7.5713	5.82333	6.27285	6.76616	6.73943	6.91578	7.92678	6.1991	5.85165	6.6948	7.44705	coding	NM_019013	FAM64A	RefSeq_coding	1483	chr17	+	6347794	6354384		ACCAGCGTGTGACTTTCCTAGATAACACTGCTTTCTCATAATAAAGACTATTTGCATTTG	54478	Hs.592116	GO:0005515|GO:0005730	NP_061886	Family with sequence similarity 64, member A
ASHG19A3A014882	0.00839442	1.85702	down	81.8305	142.275	6.28351	7.17649	85.8684	101.991	70.4351	148.61	180.46	129.4	167.036	48.5489	80.558	109.712	79.7387	7.2405	6.48941	6.18822	7.14391	8.02652	6.39814	7.07338	5.85219	6.53109	6.5304	6.10973	coding	NM_138468	ICA1L	RefSeq_coding	7996	chr2	-	203637872	203736371		TAAAATTTCAAGCAGAACGGGATGCAACTCAAGCTGGCAAAATGATGGATGCCACTGGCA	130026	Hs.516629		NP_839945	Islet cell autoantigen 1,69kDa-like
ASHG19A3A052183	0.0166418	1.58904	down	36.0272	53.6502	5.07098	5.73914	29.3383	44.3568	26.0365	51.3231	63.4301	60.8893	63.2701	17.5278	38.6791	43.4989	46.0639	5.69326	5.31736	4.73628	5.66278	6.14598	5.41933	5.77435	4.32343	5.48201	5.23339	5.33344	coding	NM_018365	MNS1	RefSeq_coding	2023	chr15	-	56720928	56757335		AACAAAGAATGAAGCAGCTGGAACACAGGAGGGCTGTGGAAAAACTTATTGAAGAGCGTC	55329	Hs.444483	GO:0007126|GO:0005882|GO:0005635|GO:0005634	NP_060835	Meiosis-specific nuclear structural 1
ASHG19A3A035039	0.0191241	1.78241	down	16.4772	30.2508	3.95985	4.79367	11.0658	24.6002	12.6703	23.4545	40.7464	31.0417	44.9459	15.2355	19.2857	16.2827	10.789	4.28559	4.49802	3.61697	4.5755	5.20487	4.57509	5.32731	4.11159	4.48603	3.84492	3.20155	coding	NM_022742	CCDC136	RefSeq_coding	4168	chr7	+	128432098	128462183		TTAAAATGAAAAAGGTGACCAAGCCATGCTCGGATACTTCTGAGAGCGACCTTGAGACCA	64753	Hs.521178	GO:0005515|GO:0016021|GO:0016020	NP_073579	Coiled-coil domain containing 136
ASHG19A3A008373	0.0223332	1.58557	down	268.514	395.689	7.95162	8.61662	233.303	218.589	273.53	400.582	331.394	472.869	540.3	185.944	256.898	485.361	190.762	8.6625	7.58563	8.11738	8.53953	9.00695	8.16328	8.71084	7.85896	8.1939	8.61976	7.33411	coding	NM_016602	CCR10	RefSeq_coding	1244	chr17	-	40831421	40833845		GGACTACCTCTGTGCCTTGCCACATTAAATTGATAACATGGAAATGAGATGCAACCCAAC	2826	Hs.278446	GO:0016493|GO:0004930|GO:0005515|GO:0004872|GO:0007186|GO:0006935|GO:0007204|GO:0005887|GO:0005886|GO:0005886	NP_057686	Chemokine (C-C motif) receptor 10
ASHG19A3A040870	0.00780142	2.25053	down	8.25967	18.3159	2.93982	4.11008	10.5448	12.7503	9.24081	17.3479	40.6501	14.2323	8.80444	7.63624	5	8.24046	6.69021	4.21747	3.54701	3.10753	4.15887	5.19998	3.61953	3.35456	3.15539	2.39419	2.86715	2.56766	coding	NM_022567	NYX	RefSeq_coding	2629	chrX	+	41306712	41334905		TTTCCCTTAGCCCAACACCAGGGTCATTAAGAAGGAAGGAATGTGAGGAAGAAAGAAAGG	60506	Hs.302019	GO:0003674|GO:0008150|GO:0050896|GO:0007601|GO:0005576|GO:0005622|GO:0005578	NP_072089	Nyctalopin
ASHG19A3A003347	0.0238553	1.76361	down	5.55719	10.661	2.45394	3.27248	7.90787	5	5.90674	5	25.6751	8.35132	6.37062	5	5	7.43639	5	3.82195	2.35386	2.53688	2.3662	4.18685	2.96877	3.01861	2.36059	2.39419	2.73087	2.34725	coding	NM_001166171	NEK6	RefSeq_coding	2759	chr9	+	127054249	127114717		TGGAGCTTCTCAGGAGCCACTTCAAAAGGAGAAGAAGACACATGAATTAGAGACAGCACG	10783	Hs.197071	GO:0005524|GO:0019894|GO:0000287|GO:0000166|GO:0005515|GO:0019901|GO:0004674|GO:0004871|GO:0006915|GO:0007049|GO:0051301|GO:0007059|GO:0007067|GO:0018105|GO:0043123|GO:0006468|GO:0030071|GO:0007165|GO:0005737|GO:0005634	NP_055212	NIMA (never in mitosis gene a)-related kinase 6
ASHG19A3A015135	0.000341164	1.51667	down	119.022	185.355	6.86416	7.46507	88.2296	142.241	127.214	164.106	150.301	285.755	238.382	101.468	104.266	113.94	125	7.28105	6.96123	7.04544	7.28348	7.71774	7.46789	7.57517	6.94975	6.89101	6.58293	6.75457	coding	NM_018410	HJURP	RefSeq_coding	3065	chr2	-	234745486	234763212		AGAAAAAGTCTACTGGGCTCAACTGCAATTGAGGCTCCTTCATCTACATGTGTTGCTCGT	55355	Hs.532968	GO:0003677|GO:0042393|GO:0005515|GO:0034080|GO:0034080|GO:0007049|GO:0034509|GO:0007059|GO:0006334|GO:0000775|GO:0000777|GO:0005737|GO:0005730|GO:0005654|GO:0005634	NP_060880	Holliday junction recognition protein
ASHG19A3A008268	0.039987	1.59709	down	202.88	305.025	7.60062	8.27607	203.732	175.762	164.85	297.412	298.789	380.855	344.336	216.441	258.506	137.563	264.157	8.46799	7.26845	7.40187	8.11868	8.84609	7.86815	8.07944	8.09132	8.20038	6.84762	7.7941	coding	NM_021724	NR1D1	RefSeq_coding	2766	chr17	-	38249040	38256973		ATCCAGTACAAAAGGTGTCTGAAGAATGAGAATTGCTCCATCGTCCGCATCAATCGCAAC	9572	Hs.592130	GO:0004879|GO:0046872|GO:0010843|GO:0003700|GO:0003707|GO:0003714|GO:0008270|GO:0071222|GO:0007623|GO:0010467|GO:0010553|GO:0010871|GO:0034144|GO:2000189|GO:0034339|GO:0006355|GO:0043401|GO:0000790|GO:0005654|GO:0005634	NP_068370	Nuclear receptor subfamily 1, group D, member 1
CUST_8_PI426249100	0.0101968	2.73659	down	64.555	185.346	5.83821	7.2906	38.4421	107.888	94.2431	151.1	168.945	277.462	290.782	32.519	60.6548	61.3479	30.6767	6.08404	6.56307	6.61716	7.16697	7.91523	7.42998	7.85676	5.24383	6.12507	5.71699	4.76317	coding	NM_017409_Exon2+	NM_017409	HOX cluster	1108	chr12	+	54382952	54384060	NM_017409,	TCCCTGTCTGGGAGTTGTGTTATTTAAAGATATTCTGTATGTTGTATCTTTTGCATGTAG
ASHG19A3A054572	0.00968274	1.6556	down	71.6837	116.007	6.12868	6.85604	64.9103	84.8083	55.3681	109.76	128.25	159.127	117.985	84.2741	72.0736	55.8681	77.7099	6.83793	6.23202	5.84285	6.7181	7.4486	6.67243	6.60316	6.66803	6.37395	5.58106	6.07421	coding	NM_178550	C1orf110	RefSeq_coding	1552	chr1	-	162824086	162838605		AAGACTGCAGAGACTAAAGGTTATTTGCCTCTACCATGTGAAATTGCTGACCTGGGAGCA	339512	Hs.407631		NP_848645	Chromosome 1 open reading frame 110
CUST_20_PI426249100	0.0238871	1.66528	down	1846.01	3224.6	10.7728	11.5085	1368.15	1919.61	1551.22	2556.5	2517.19	3337.74	6343.42	1266.02	2224.6	1486.82	2627.77	11.0924	10.762	10.5597	11.139	12.07	11.1048	12.1365	10.7965	11.2259	10.2339	11.0585	coding	NM_014620_Exon4+	NM_014620	HOX cluster	1180	chr12	+	54448633	54449813	NM_153633,NM_014620,	ATTTTAGTGTCGATGTGAAATGCCCCGTGATCAATAATAAACCAGTGGATGTGAATTAGT
ASHG19A3A051803	0.0236311	1.79356	down	7.18719	13.1194	2.74815	3.59098	6.96724	6.40458	5.4291	6.17499	26.3018	14.6173	11.5356	5	5.76399	14.589	5.93645	3.64924	2.62938	2.48209	2.74506	4.242	3.64838	3.67021	2.36059	2.84667	3.6907	2.47945	coding	NM_002719	PPP2R5C	RefSeq_coding	4445	chr14	+	102276139	102394326	NM_001161725,	ATGGAGACAGATGGGCCTTTATTTGAAGATGTGCAGATGCTGAGAAAGACAGTGAAGGAC	5527	Hs.368264	GO:0005515|GO:0008601|GO:0008601|GO:0006977|GO:0042771|GO:0008285|GO:0043161|GO:0007165|GO:0000775|GO:0005634|GO:0000159|GO:0000159	NP_848702	Protein phosphatase 2, regulatory subunit B', gamma
ASHG19A3A054847	0.0407867	1.61124	down	5329.76	8972.98	12.3018	12.99	3441.28	7032.08	5313.98	6472.25	8121.84	11634.5	15195	2886.28	6600.45	4777.26	5368.54	12.319	12.6517	12.3351	12.4663	13.7279	13.0002	13.4367	12.0224	12.7553	11.9536	12.0929	coding	NM_021197	WFDC1	RefSeq_coding	1396	chr16	+	84328400	84363446		TGCTGAGGCCTAAATGTTAGCAGGTGGGAGGAGGCCACAGAACAATAAAAACAACCAAAT	58189	Hs.36688	GO:0003674|GO:0030414|GO:0004867|GO:0030308|GO:0050680|GO:0042493|GO:0032355|GO:0005576|GO:0005615	NP_067020	WAP four-disulfide core domain 1
ASHG19A3A048031	0.0312878	1.95481	down	10.9196	21.7145	3.34119	4.30822	12.9978	11.4435	8.70592	8.67927	39.4466	28.6221	18.8268	5.17752	16.7614	11.3409	12.0881	4.51478	3.38714	3.01942	3.16794	5.13844	4.47353	4.24642	2.6494	4.28213	3.3252	3.38388	coding	NM_138451	IQCD	RefSeq_coding	1363	chr12	-	113633247	113658880		CAAATCATTGATACTCTTGAAAAGGAATTGGCGGAGAGAATGAAGAACAGGAATGCAGAG	115811	Hs.568276		NP_612460	IQ motif containing D
ASHG19A3A006203	0.0294224	1.97446	down	9.21987	17.689	3.08282	4.06428	14.1617	13.1178	9.36469	14.0207	39.5436	13.6254	7.09338	5	6.99916	9.06678	11.7708	4.64662	3.58851	3.12807	3.84325	5.14243	3.56338	3.12574	2.36059	3.07736	2.99892	3.34346	coding	NM_152998	EZH2	RefSeq_coding	2563	chr7	-	148504474	148581414		GAGCTCATTGCGCGGGACTAGGGAGGTGGAAGATGAAACTGTTTTACATAACATTCCTTA	2146	Hs.444082	GO:0003677|GO:0042054|GO:0018024|GO:0008168|GO:0005515|GO:0016564|GO:0016740|GO:0016568|GO:0006325|GO:0016571|GO:0048387|GO:0006355|GO:0035098|GO:0005634	NP_694543	Enhancer of zeste homolog 2 (Drosophila)
ASHG19A3A009167	0.0147217	1.72001	down	3437.42	5790.22	11.6531	12.4355	3551.64	3389.75	3723.78	4815.17	4998.63	5972.1	9613.56	1816.17	5176.85	3281.48	3236.52	12.3655	11.6131	11.8171	12.0478	13.0427	11.9844	12.7371	11.3256	12.3992	11.4019	11.3617	coding	NM_016113	TRPV2	RefSeq_coding	2797	chr17	+	16318887	16340315		ACATCTGCTGGCTCTGGGGTCCCAGTGAATTCTGGTGGCAAATATATATTTTCACTAACT	51393	Hs.279746	GO:0005262|GO:0005261|GO:0005216|GO:0015075|GO:0034220|GO:0009408|GO:0009266|GO:0007600|GO:0006810|GO:0005737|GO:0005887|GO:0005622|GO:0042470|GO:0005886	NP_057197	Transient receptor potential cation channel, subfamily V, member 2
ASHG19A3A047722	0.0192377	1.80984	down	9225.13	16439.9	13.064	13.9198	9975.59	9004.98	11150.4	14573.6	14037.5	15560.1	28052.6	4899.88	13814.9	5803.61	10677	13.7492	13.0358	13.4335	13.6203	14.4481	13.4669	14.3147	12.7871	13.8138	12.236	13.0776	coding	NM_020142	NDUFA4L2	RefSeq_coding	1275	chr12	-	57628687	57634475		TGTCCCCAGGGATCAAACAGAAGCAGCCGTGGGCAAAATACAATTTCATTTAACAAATTG	56901	Hs.75069		NP_064527	NADH dehydrogenase (ubiquinone) 1 alpha subcomplex, 4-like 2
ASHG19A3A005624	0.031462	1.74462	down	18.3806	32.2123	4.17735	4.98026	34.6555	20.7945	16.2898	15.2389	43.4401	35.7921	31.9348	21.1584	16.2232	16.8815	18.9363	5.93726	4.26529	4.00747	3.96863	5.34706	4.75451	4.89385	4.60087	4.23476	3.89926	4.05643	coding	NM_033284	TBL1Y	RefSeq_coding	2407	chrY	+	6778726	6959723		GCATTGATGTCCTAGGTTGTAAGGTGCTAAGGGGAATGCCAGCTGTTCTCTTAACAGAAG	90665	Hs.664560	GO:0003677|GO:0003682|GO:0010843|GO:0003714|GO:0045444|GO:0045892|GO:0045944|GO:0043161|GO:0043627|GO:0005634|GO:0005667	NP_599021	Transducin (beta)-like 1, Y-linked
ASHG19A3A051390	0.00807966	1.6281	down	5	9.88177	2.35987	3.06306	5	5	5	5.06635	19.839	9.39021	10.1133	5	5	5	5	2.53526	2.35386	2.35229	2.54634	3.62202	3.10254	3.50914	2.36059	2.39419	2.35107	2.34725	coding	NM_054024	MIA2	RefSeq_coding	2351	chr14	+	39703124	39722573		AGTGTCTGGAGAGTACAAAACTGCTGGCAGACCTTAAAAAATGTGGTGACTTGGAATGTG	117153	Hs.287694	GO:0005576	NP_473365	Melanoma inhibitory activity 2
ASHG19A3A048221	0.017938	1.71138	down	5.81344	11.8594	2.49478	3.26994	5	7.11055	5	8.74487	17.0234	9.42802	19.1007	5	5	7.7701	5	2.53526	2.73104	2.35229	3.17739	3.26864	3.10656	4.26183	2.36059	2.39419	2.78331	2.34725	coding	NM_001039029	LRTM2	RefSeq_coding	3950	chr12	+	1929432	1945918		GGCATTGTCAATGGTGGTATCTTTAGCCTGAGACAGAAGATTTTTAAAGGCAAAATTATA	654429	Hs.585579	GO:0016021|GO:0016020	NP_001157398	Leucine-rich repeats and transmembrane domains 2
ASHG19A3A001481	0.0221775	2.25277	down	6.75432	17.3879	2.7741	3.9458	13.897	6.71125	5.93542	6.45506	41.5551	17.3373	7.69499	6.25179	7.89811	7.98545	5.7439	4.61851	2.66717	2.54096	2.79363	5.25039	3.85926	3.2072	2.93645	3.22097	2.82174	2.4573	coding	NM_001076552	ACSS2	RefSeq_coding	3027	chr20	+	33464327	33515769		ATTAAGAGGTCATGCCCAGATGTGCAGGGTAAACTGAAAGAGAAATCCAAGCGTGTTCAG	55902	Hs.517034	GO:0016208|GO:0005524|GO:0003987|GO:0003987|GO:0016874|GO:0000166|GO:0005515|GO:0006069|GO:0008610|GO:0006805|GO:0005737|GO:0005737|GO:0005829|GO:0043231|GO:0005730|GO:0005634	NP_061147	Acyl-CoA synthetase short-chain family member 2
ASHG19A3A009482	0.0349362	1.77767	down	89.321	160.323	6.37694	7.20693	64.6002	125.032	86.2817	125.494	169.28	134.249	307.994	75.1831	40.3061	107.907	101.216	6.83094	6.78088	6.48755	6.90764	7.91854	6.44763	7.92988	6.49329	5.54084	6.50693	6.45216	coding	NM_199334	THRA	RefSeq_coding	2405	chr17	+	38219062	38246289		CTAACTGCACTTTGGAAACCAAGCAAGGGGAGAAGACAAATGAAGAAAAACTAGACAGAG	7067	Hs.724	GO:0017025|GO:0044213|GO:0046872|GO:0010843|GO:0005515|GO:0019904|GO:0046982|GO:0042803|GO:0003700|GO:0003707|GO:0002153|GO:0070324|GO:0070324|GO:0004887|GO:0016563|GO:0008134|GO:0016988|GO:0016564|GO:0008270|GO:0030325|GO:0007420|GO:0001502|GO:0042994|GO:0048565|GO:0048568|GO:0030218|GO:0008050|GO:0010467|GO:0009755|GO:0001822|GO:0007611|GO:0001889|GO:0030324|GO:0017055|GO:0043433|GO:0009887|GO:…	NP_955366	Thyroid hormone receptor, alpha (erythroblastic leukemia viral (v-erb-a) oncogene homolog, avian)
ASHG19A3A017273	0.0404591	1.77588	down	49.8811	84.872	5.60586	6.4344	67.3296	47.5682	59.5906	64.7787	117.147	62.7692	112.335	55.4361	44.4913	57.9796	34.2209	6.8853	5.41163	5.94577	5.98752	7.3044	5.46045	6.5343	6.04455	5.68335	5.63337	4.9165	coding	NM_152376	UBXN10	RefSeq_coding	2987	chr1	+	20512577	20519941		TGGTGAGCTTAGAATTTTGGGGTTGGGAAAAAGTGGAAGGCATAAGCATAGAAATATTTT	127733	Hs.432503		NP_689589	UBX domain protein 10
ASHG19A3A012889	0.00466784	1.7731	down	5.52897	10.9744	2.43685	3.26312	5.74591	5	5	8.70348	19.7046	15.7178	5	5	5	6.77059	6.40326	3.40698	2.35386	2.35229	3.17118	3.60744	3.73849	2.3915	2.36059	2.39419	2.63354	2.52662	coding	NM_144688	CCDC155	RefSeq_coding	2342	chr19	+	49891505	49921246		TCAGTGTGCAGTGGGTAGATTCAAATCATATTCATAATAAAAGAGAAGCAGTTGCCTGCC	147872	Hs.727765	GO:0005509|GO:0016021|GO:0016020	NP_653289	Coiled-coil domain containing 155
ASHG19A3A011718	0.0208725	1.7355	down	2859.92	4834.25	11.3674	12.1627	2591.22	2918.75	3278.72	4302.75	3838.34	5673.74	7765.17	1629.35	4555.31	1946.43	2830.98	11.9339	11.3874	11.6354	11.8832	12.6682	11.9001	12.4282	11.1696	12.2309	10.6168	11.1643	coding	NM_001080457	LRRC4B	RefSeq_coding	2958	chr19	-	51020151	51071302		TTTTGATACTGAAGGGAGGTTTGCGTCAACGACTACCTGCTCTGTAATTACTTTAAAAAA	94030	Hs.120873	GO:0030054|GO:0016021|GO:0005886|GO:0042734|GO:0045202	NP_001073926	Leucine rich repeat containing 4B
ASHG19A3A009327	0.00201972	2.03399	down	8.1206	16.8737	2.97588	4.00019	8.97174	5.56985	5	14.859	22.0268	15.7141	22.797	10.6774	7.55036	9.39755	10.5285	3.99663	2.51417	2.35229	3.93082	3.85526	3.73799	4.48027	3.6025	3.17066	3.04979	3.16588	coding	NM_005208	CRYBA1	RefSeq_coding	806	chr17	+	27573874	27581500		ATTGGTTATGAGCATACCAGCTTCTGTGGGCAACAGTTTATCCTGGAGAGAGGAGAATAC	1411	Hs.46275	GO:0003674|GO:0042803|GO:0005212|GO:0002088|GO:0007601|GO:0007601|GO:0005737|GO:0005634|GO:0005625	NP_005199	Crystallin, beta A1
CUST_9_PI426247286	0.0480999	2.02833	down	9.42748	18.8603	3.10418	4.12448	9.45447	7.66643	15.0073	18.4278	44.201	12.0124	10.2057	5	11.9907	11.9005	5	4.07022	2.82517	3.88789	4.24337	5.38592	3.40306	3.51982	2.36059	3.80468	3.3995	2.34725	coding	NM_018953_intron1+	NM_018953	HOX cluster	700	chr12	+	54427360	54428061		CATAGGAACAAAACGTGTATAAAAGGCAATATTCAATTTTTGGGGGAGAGGGAGGGAGTT
ASHG19A3A036614	0.0281825	1.53985	down	21.0114	30.8068	4.35813	4.98092	27.1665	15.0852	21.7407	28.7641	42.6271	30.6481	24.828	17.3128	23.6511	21.0118	27.2666	5.5863	3.79793	4.45961	4.86311	5.30587	4.56147	4.58787	4.304	4.7794	4.21623	4.5916	coding	NM_170587	RGS20	RefSeq_coding	2120	chr8	+	54764367	54871861		ACAGACATTCACCAAATCACAGAAAATGAAGGAGACCTCAGGGCTGTTCCTGATATCAAG	8601	Hs.368733	GO:0005096|GO:0005515|GO:0004871|GO:0009968|GO:0008277|GO:0005737|GO:0005634|GO:0005886	NP_733466	Regulator of G-protein signaling 20
ASHG19A3A004033	0.011986	1.75016	down	13.2139	22.4293	3.65009	4.45757	13.5315	13.0577	17.9534	18.6377	34.8829	27.2405	17.854	16.1122	9.48827	7.82791	14.8439	4.57836	3.58099	4.16061	4.2616	4.85526	4.41179	4.18087	4.19941	3.47261	2.79224	3.69465	coding	NM_002465	MYBPC1	RefSeq_coding	3938	chr12	+	101988746	102079657		ATTGAATGCAAACTGGAGGTGAAAGTGATATATCAAGGAGTAAATACCCCTGGACAACCA	4604	Hs.654589	GO:0003779|GO:0008307|GO:0031432|GO:0007155|GO:0030049|GO:0005829|GO:0030016|GO:0032982	NP_996557	Myosin binding protein C, slow type
ASHG19A3A010937	0.00130981	3.03198	down	7.19749	22.857	2.7797	4.37996	12.402	10.2734	7.3919	12.1384	42.8415	13.4186	33.4843	5.51924	5	9.24706	5.75334	4.45236	3.22752	2.7797	3.63366	5.31756	3.5433	4.95291	2.79045	2.39419	3.02825	2.45811	coding	NM_003685	KHSRP	RefSeq_coding	3262	chr19	-	6413120	6424822		AGGAGGTGAACAAATTAACAAAATCCAACAGGATTCAGGCTGCAAAGTACAGATTTCTCC	8570	Hs.726172	GO:0003677|GO:0003723|GO:0005515|GO:0016070|GO:0008380|GO:0000375|GO:0016071|GO:0006397|GO:0051028|GO:0006810|GO:0005737|GO:0005829|GO:0005634	NP_003676	KH-type splicing regulatory protein
ASHG19A3A020771	0.0255813	1.8024	down	5.42183	11.4404	2.44041	3.29033	5	5.99744	5	13.8845	6.51969	19.8989	11.899	5	5	5.14839	6.38515	2.53526	2.57196	2.35229	3.82794	2.35673	4.02611	3.70562	2.36059	2.39419	2.43841	2.52505	coding	NM_001008740	TMCO2	RefSeq_coding	741	chr1	+	40713572	40717365		TGCTCCAGCTGTGCAAATCATCTTGAGGATTTCTTTCTTGATTTTATTGGGAATAGGAAT	127391	Hs.406265	GO:0016021|GO:0016020	NP_001008740	Transmembrane and coiled-coil domains 2
ASHG19A3A025197	0.0383463	1.58981	down	1530.71	2343.3	10.4236	11.0924	1272.04	1732.85	1274.99	1683.35	1556.62	4170.76	3033.71	582.741	2172.03	1507.97	1913.66	10.9858	10.6114	10.2966	10.554	11.3454	11.4461	11.1309	9.59852	11.1902	10.2538	10.591	coding	NM_002926	RGS12	RefSeq_coding	6240	chr4	+	3315873	3433903		TCTCACCTGCGTTTTGAGTCTGTTCTTCCAGGAGTAATAAATTCTGGACATCATCACTGG	6002	Hs.527061	GO:0005096|GO:0030695|GO:0005057|GO:0009968|GO:0008277|GO:0000794|GO:0005737|GO:0005634|GO:0005886	NP_937872	Regulator of G-protein signaling 12
ASHG19A3A044366	0.017984	2.07851	down	14.126	33.0298	3.7203	4.77585	12.4651	16.6757	19.8433	16.8037	33.6045	32.5394	69.7362	5.35704	12.156	13.493	17.2308	4.45805	3.94621	4.31735	4.11001	4.77719	4.63531	5.8987	2.73205	3.82357	3.57731	3.92532	coding	NM_001010917	GOLGA7B	RefSeq_coding	2894	chr10	+	99609995	99627781		GGTTGGACTGAAAGCGAGGCCAAAAGTAATCAATTAATGATATCAATAAATCCTCATTTC	401647	Hs.567524	GO:0005794|GO:0000139|GO:0016020	NP_001010917	Golgin A7 family, member B
ASHG19A3A049184	0.0280626	1.58832	down	5	9.80182	2.35987	3.02737	5.28179	5	5	5	16.9731	16.7542	5	5	5	5	5	3.29883	2.35386	2.35229	2.3662	3.25974	3.8206	2.3915	2.36059	2.39419	2.35107	2.34725	coding	NM_023928	AACS	RefSeq_coding	3341	chr12	+	125549924	125627872		TTTTGAAGAGCTGAGGCAAGAAGTGGCTTTGTTTGCAGCAGCAATGAGGAAAATGGGTGT	65985	Hs.656073	GO:0005524|GO:0030729|GO:0047760|GO:0016874|GO:0000166|GO:0060612|GO:0071397|GO:0071333|GO:0071394|GO:0006631|GO:0006629|GO:0001889|GO:0032024|GO:0042493|GO:0045471|GO:0007584|GO:0034201|GO:0010243|GO:0014074|GO:0042594|GO:0050872|GO:0005737|GO:0005829	NP_076417	Acetoacetyl-CoA synthetase
ASHG19A3A029411	0.0224169	1.53059	down	5	8.61386	2.35987	2.97396	6.27713	5	5	9.26253	17.5296	5	5	5	5	5	5	3.51982	2.35386	2.35229	3.24987	3.3437	2.36492	2.3915	2.36059	2.39419	2.35107	2.34725	coding	NM_005906	MAK	RefSeq_coding	3830	chr6	-	10762956	10831110		TATTCAGCTCATGACCGAAATGTTGAATTGGGATCCAAAGAAACGACCGACAGCAAGCCA	4117	Hs.446125	GO:0005524|GO:0004693|GO:0000166|GO:0004672|GO:0030154|GO:0007275|GO:0006468|GO:0007283	NP_005897	Male germ cell-associated kinase
ASHG19A3A046584	0.0372447	1.69884	down	397.418	719.545	8.49057	9.25511	240.359	508.701	376.676	494.245	416.367	1139.31	1307.44	151.753	497.153	387.865	462.363	8.70512	8.81608	8.57082	8.83536	9.34937	9.45168	9.93405	7.55456	9.11206	8.30363	8.58627	coding	NM_006779	CDC42EP2	RefSeq_coding	2001	chr11	+	65082330	65089899		ATGCAACAGGAGCAAACCAAGTGTTGCTGTGACATTGATTCAGATGTTTGGCAAGAGGTG	10435	Hs.343380	GO:0017049|GO:0005100|GO:0001515|GO:0005515|GO:0030036|GO:0007015|GO:0030838|GO:0031334|GO:0031274|GO:0008360|GO:0005737|GO:0005856|GO:0012505|GO:0016020|GO:0005886	NP_006770	CDC42 effector protein (Rho GTPase binding) 2
ASHG19A3A031458	0.0413254	1.75069	down	7.82736	13.0384	2.81942	3.62735	9.02598	5	5	17.8176	18.2542	14.6453	5.44895	5	5.30607	12.2564	14.4017	4.00361	2.35386	2.35229	4.19586	3.43431	3.65161	2.85137	2.36059	2.75805	3.43993	3.65183	coding	NM_015050	FTSJD2	RefSeq_coding	4137	chr6	+	37400906	37449282		AGAATGTACCACTGAAATTCCTGACACTCAGGAAATGAGCGATTGGATGGTGGTGGGAAA	23070	Hs.520102	GO:0004483|GO:0008168|GO:0003676|GO:0016740|GO:0006370|GO:0080009|GO:0005737|GO:0005622|GO:0005730|GO:0005634	NP_055865	FtsJ methyltransferase domain containing 2
ASHG19A3A029256	0.0222682	1.71323	down	13.076	20.9599	3.60867	4.38539	18.651	13.8788	7.89073	20.2289	28.2853	24.7592	12.8748	8.786	14.9634	19.6331	13.3037	5.05358	3.6741	2.87172	4.37238	4.40736	4.29573	3.79793	3.33182	4.11807	4.1196	3.53674	coding	NM_014594	ZNF354C	RefSeq_coding	2390	chr5	+	178487606	178507689		ATGCCAAAGTTGATTCATCAGTTGCAGCAAGGAGAAGATCCCTGCATGGTGGAAAGAGAA	30832	Hs.272328	GO:0003677|GO:0046872|GO:0008270|GO:0006355|GO:0005622|GO:0005634	NP_055409	Zinc finger protein 354C
ASHG19A3A047409	0.0388719	1.56443	down	191.486	284.579	7.52971	8.17535	217.775	221.519	247.218	208.237	316.318	383.786	296.778	169.807	156.876	153.958	199.539	8.56387	7.60381	7.9765	7.61496	8.9367	7.87937	7.88182	7.72116	7.46862	7.00777	7.40039	coding	NM_001101339	C12orf77	RefSeq_coding	1516	chr12	-	25146369	25150373		ATGAGGATGACAGGCACTATTTTGGTGTGCTCCCCACCACAGCAATAACAGAAAGATAGT	196415	Hs.434453		NP_001094809	Chromosome 12 open reading frame 77
ASHG19A3A051718	0.0121176	1.55891	down	5.1883	9.10389	2.39625	3.03679	5.34616	5	6.1298	7.53566	20.5001	7.1375	5	5	5	5	5	3.31402	2.35386	2.57057	2.97821	3.69856	2.80167	2.3915	2.36059	2.39419	2.35107	2.34725	coding	NM_138344	FAM181A	RefSeq_coding	1806	chr14	+	94385257	94395944		TAAAATGTCTTGATGCCCTTAGAAGAGAGAAGATCTTCTGGAGAGAGGAATGATGCAGCC	90050	Hs.525550		NP_612353	Family with sequence similarity 181, member A
ASHG19A3A026672	0.0241289	1.53988	down	27.9653	44.7542	4.77208	5.3949	35.6699	35.6386	27.1008	42.231	31.2022	61.2509	53.417	25.6705	23.9059	33.5273	21.9488	5.97472	5.01127	4.79546	5.40111	4.61595	5.42848	5.55423	4.88816	4.79637	4.86823	4.27303	coding	NM_031900	AGXT2	RefSeq_coding	2406	chr5	-	34998205	35048240		GATACGCTGAGCACATCTGTGGCCAAGTCAATTGCTGGATTTTTCGCAGAACCTATTCAA	64902	Hs.34494	GO:0047305|GO:0008453|GO:0030170|GO:0016740|GO:0034641|GO:0046487|GO:0055086|GO:0006206|GO:0046135|GO:0005759|GO:0005739	NP_114106	Alanine--glyoxylate aminotransferase 2
ASHG19A3A020989	0.0141	1.85636	down	20.1696	34.0633	4.24079	5.13327	31.2943	20.789	19.8237	33.2567	49.7463	30.4117	25.6074	17.6928	11.2635	34.4067	17.0419	5.79152	4.26492	4.31557	5.06207	5.63466	4.55191	4.62618	4.33767	3.71596	4.90055	3.91007	coding	NM_199183	PRSS45	RefSeq_coding	962	chr3	-	46783581	46786245		AGATGGTTTGACCAAGGTCATGTGTCCATCTTCAAAAAGAGTCAGGGTGGGGAAGAGTAA	377047	Hs.667712	GO:0008233|GO:0004252|GO:0006508	NP_954652	Protease, serine, 45
ASHG19A3A023471	0.0327887	1.73229	down	5	10.9947	2.35987	3.15255	5	5	5	8.0224	26.8004	5	10.1505	5	5	5	5	2.53526	2.35386	2.35229	3.06211	4.28766	2.36492	3.51281	2.36059	2.39419	2.35107	2.34725	coding	NM_025047	ARL14	RefSeq_coding	1335	chr3	+	160394947	160396233		CAGCTGGGTGGTGTAAAAAATGAACTTCAAATTATGGAGTGGAAAAAGCGTAATGTTAAT	80117	Hs.287702	GO:0005525|GO:0000166|GO:0007264|GO:0005622	NP_079323	ADP-ribosylation factor-like 14
ASHG19A3A049039	0.0134107	2.03129	down	17.7953	35.2812	4.05841	5.08081	21.6038	26.7298	18.2971	20.0899	46.6392	35.3298	52.7435	23.4553	12.2153	15.2146	10.86	5.26346	4.61128	4.19182	4.36393	5.50283	4.7368	5.53704	4.75524	3.83139	3.7508	3.20996	coding	NM_152442	RAD9B	RefSeq_coding	1898	chr12	+	110940004	110969889		TTCAACCACCCTTTCGACAGTCTGGCAAGAGCAAGTGACAGTGAAGAGGACATGAATAAT	144715	Hs.97794	GO:0005515|GO:0006281|GO:0006260|GO:0000075|GO:0005654	NP_689655	RAD9 homolog B (S. pombe)
ASHG19A3A030098	0.0279251	5.7782	down	28.884	128.061	3.54287	6.07349	8.01681	133.916	5	65.6717	55.5554	372.936	138.125	7.83225	5	10.6372	10.9188	3.8396	6.88353	2.35229	6.0067	5.86202	7.83754	6.82161	3.18556	2.39419	3.22284	3.21883	coding	NM_016571	LGSN	RefSeq_coding	5634	chr6	-	63985856	64029882		ATAATTACATTGCCAGCTTCTTCATTGAGACTGGATTTTGTGATTCAGGGATTTTGTCTC	51557	Hs.149585	GO:0003824|GO:0004356|GO:0006542|GO:0006807	NP_057655	Lengsin, lens protein with glutamine synthetase domain
ASHG19A3A047262	0.0026583	1.76959	down	18.6831	33.8976	4.19704	5.02046	25.9945	21.3817	18.3809	31.625	29.1031	47.3315	35.434	22.1988	14.9996	15.681	19.4568	5.52662	4.29949	4.19877	4.99234	4.46422	5.0955	5.0236	4.67298	4.12136	3.79352	4.09612	coding	NM_020634	GDF3	RefSeq_coding	1224	chr12	-	7842381	7848360		AGAAGTTCCAACCTGTGCCTTATATCTTGAAGAAAATTTTCCAGGATCGCGAGGCAGCAG	9573	Hs.86232	GO:0005125|GO:0008083|GO:0040007|GO:0002021|GO:0005576|GO:0005615	NP_065685	Growth differentiation factor 3
ASHG19A3A008841	0.0131995	1.53946	down	1524.17	2282.37	10.443	11.0655	1164.18	1467.57	2163.23	2830.14	1277.89	3441.82	2697.81	715.456	1425.84	1293.77	2079.17	10.871	10.3605	11.0313	11.2773	11.0579	11.1531	10.9679	9.90817	10.6082	10.0368	10.7132	coding	NM_003258	TK1	RefSeq_coding	1616	chr17	-	76170159	76183285		GGTCCACGCCTCTGCTGTAGCTTATGAAATTAACTAATTGAAAATTCACTGGTTGGTGGA	7083	Hs.515122	GO:0005524|GO:0016301|GO:0046872|GO:0019206|GO:0000166|GO:0004797|GO:0016740|GO:0008270|GO:0006260|GO:0055086|GO:0006139|GO:0051289|GO:0006206|GO:0043097|GO:0005737|GO:0005829	NP_003249	Thymidine kinase 1, soluble
ASHG19A3A020329	0.0133603	1.87922	down	8.29515	15.824	2.90689	3.81702	6.08908	8.22185	5	9.37071	22.776	20.6454	20.2388	5	7.28831	15.3905	8.87026	3.48117	2.91974	2.35229	3.26592	3.92532	4.07724	4.33545	2.36059	3.12623	3.7663	2.91618	coding	NM_001002837	INPP5J	RefSeq_coding	2238	chr22	+	31518960	31530682		TTGCAAGGACTATGTGGCTTATGTCTGGGCCAAACATGAAGATGTGGATGGGAATACCTA	27124	Hs.517549	GO:0017124|GO:0016787|GO:0052659|GO:0052658|GO:0004445|GO:0034485|GO:0031115|GO:0010977|GO:0033137|GO:0005737|GO:0043198|GO:0030426|GO:0005886|GO:0001726	NP_001002837	Inositol polyphosphate-5-phosphatase J
ASHG19A3A021872	0.00228331	1.65142	down	5.08315	9.22389	2.3802	3.1039	5.89459	5	5	5	16.847	10.2642	8.11368	5	5	5.49888	5	3.44367	2.35386	2.35229	2.3662	3.24208	3.20094	3.26662	2.36059	2.39419	2.47301	2.34725	coding	NM_001040100	C3orf57	RefSeq_coding	2306	chr3	-	161062580	161089871		AATTAATCACCGGAATTAGCCAGGTAGAATTTGAGTTTTAGCAAGAGTCCTGAGGGCGGG	165679	Hs.369104	GO:0005515|GO:0004758|GO:0030148|GO:0005783|GO:0005789|GO:0016021|GO:0016020|GO:0017059	NP_001035189	Chromosome 3 open reading frame 57
CUST_14_PI426249100	0.0266311	1.75678	down	1775.93	2998.23	10.6579	11.4708	1463.9	1829.59	1263.43	2096.78	2762.21	4179.97	4488.29	918.513	2965.85	1582.12	2096.08	11.187	10.686	10.2808	10.8622	12.1945	11.4502	11.6601	10.3181	11.621	10.319	10.7223	coding	NM_004503_Exon2+	NM_004503	HOX cluster	1168	chr12	+	54423438	54424606	NM_153693,NM_004503,	TACCCTCCTGTATAAATCCAACCTCTGGGTCCGTTCTCGAATATTTAATAAAACTGATAT
ASHG19A3A040926	0.0345904	1.82491	down	8.54689	15.1747	2.96709	3.83492	7.23799	9.7729	6.3996	18.32	29.6032	12.1233	8.58872	5	12.3153	5	12.7935	3.70388	3.16063	2.61554	4.23456	4.49983	3.41213	3.32418	2.36059	3.84283	2.35107	3.47186	coding	NM_205856	SPACA5	RefSeq_coding	765	chrX	+	47863733	47869126		TAAAATAACGGGAAGGCGGGATGCGTGGCTAAATTGCTCTGCGTGCACAAAGAGTAGGAG	389852	Hs.319319		NP_995328	Sperm acrosome associated 5
ASHG19A3A041682	0.0317072	1.78105	down	8.52406	15.9466	3.03495	3.86768	7.19981	6.14642	9.31407	10.94	36.2019	14.9347	10.4565	12.9279	6.28896	10.1105	6.35652	3.6964	2.59291	3.11977	3.48744	4.93507	3.67305	3.54644	3.86967	2.95186	3.15377	2.52173	coding	NM_005491	MAMLD1	RefSeq_coding	4608	chrX	+	149613719	149682448		TGGATGGAGGAAGAAGATTTATCTTTTCTCTACAAGAGCAGCCCAGGAAGAAAGCATCAG	10046	Hs.20136	GO:0003674|GO:0008584|GO:0005575|GO:0005634	NP_005482	Mastermind-like domain containing 1
ASHG19A3A054846	0.0309946	1.58598	down	24.1403	37.9746	4.57556	5.24093	23.6988	22.7867	22.2005	28.6054	62.2084	46.4738	28.8868	23.2951	29.8658	25.4003	21.2933	5.39415	4.38883	4.49556	4.85552	6.10991	5.07489	4.77018	4.74582	5.11474	4.47821	4.23019	coding	NM_139174	ADAD2	RefSeq_coding	2322	chr16	+	84224722	84230772		AAAGTGTTCAAATATAGAGCCCCTGGAGGAGAGGAATTGAAAGCAATGTGTCTGTGGCAG	161931	Hs.8977	GO:0004000|GO:0003725|GO:0006396|GO:0005622	NP_631913	Adenosine deaminase domain containing 2
ASHG19A3A042225	0.0156921	2.24266	down	7.95547	17.3975	2.80581	3.97102	7.53092	15.627	5.76854	8.83996	38.2132	16.9508	15.4529	5	5	11.054	5.2833	3.75985	3.85168	2.52027	3.19087	5.05924	3.8343	4.01086	2.36059	2.39419	3.28512	2.42305	coding	NM_002379	MATN1	RefSeq_coding	3830	chr1	-	31184125	31196432		TACACGGCTGACTTCAAGACCATCAACCAGATAGGCAAGAAGTTGCAGAAGAAGATCTGT	4146	Hs.150366	GO:0005201|GO:0005515|GO:0006461|GO:0005576|GO:0005578	NP_002370	Matrilin 1, cartilage matrix protein
ASHG19A3H0000584	0.0222974	1.98151	down	10.8138	21.6239	3.35738	4.34398	13.0404	7.79887	12.0613	12.6566	31.271	19.4989	31.6526	14.7139	13.7022	11.6064	5	4.52028	2.84816	3.53802	3.69386	4.62185	4.00056	4.88334	4.05643	3.99556	3.35885	2.34725	coding	NM_002147_Exon2+	NM_002147	HOX cluster	1199	chr17	+	46668619	46669818		GTGGGGGAAACATTTATTTGACTTCCAGGAAAGCTACAAACAAATACCAAAAGCGAATCA
ASHG19A3A009071	0.0246617	1.70503	down	141.724	244.771	7.03278	7.80257	106.307	203.668	113.543	163.794	193.532	321.004	439.217	93.7401	132.725	89.8266	216.843	7.54325	7.48017	6.88681	7.28008	8.1411	7.63275	8.41568	6.82825	7.23251	6.25266	7.51627	coding	NM_001406	EFNB3	RefSeq_coding	3236	chr17	+	7608519	7614691		TGGCGGGGTATGCCGTCACCTCAGTAGTTTTACTGTAAAAGGGAAATTTGAACAACAAAA	1949	Hs.26988	GO:0046875|GO:0005005|GO:0007628|GO:0016198|GO:0030154|GO:0007267|GO:0048013|GO:0044419|GO:0007275|GO:0007399|GO:0005887|GO:0016020	NP_001397	Ephrin-B3
ASHG19A3A011665	0.0181483	1.66783	down	996.633	1683.13	9.86466	10.6026	859.045	1247.03	1074.06	1222.91	1080.18	2466	2787.54	578.806	1292.74	676.542	1110.61	10.4561	10.1302	10.0628	10.1091	10.8054	10.6276	11.015	9.58686	10.4732	9.10634	9.82851	coding	NM_000148	FUT1	RefSeq_coding	4246	chr19	-	49251269	49258647		GTAGGCTTATCAGGGAGTTACAGTTACAATTGTTACAGTACTGTTCCCAACTCAGCTGCC	2523	Hs.69747	GO:0008417|GO:0008107|GO:0016757|GO:0042355|GO:0005975|GO:0006486|GO:0005794|GO:0032580|GO:0005887|GO:0016020|GO:0005624	NP_000139	Fucosyltransferase 1 (galactoside 2-alpha-L-fucosyltransferase, H blood group)
ASHG19A3A014798	0.0477736	1.77616	down	5.23052	12.2533	2.45936	3.28811	5	5	5	9.42906	27.1156	5	14.7218	6.38312	5	5	5	2.53526	2.35386	2.35229	3.27183	4.31339	2.36492	3.95518	2.95749	2.39419	2.35107	2.34725	coding	NM_152492	CCDC27	RefSeq_coding	2174	chr1	+	3668964	3688209		AGTGGATTTCCAAGAAACCCAGCTGCGAAAGATCAATACGGAAAATGAGACGCTGCAGAA	148870	Hs.348700		NP_689705	Coiled-coil domain containing 27
ASHG19A3A041065	0.0441865	1.52551	down	2290.92	3787.28	11.0313	11.6406	1454.76	2831.82	2202.08	3074.64	1615.82	6693.21	6097.98	930.942	2633.57	2130.17	3016.95	11.181	11.3308	11.0548	11.3845	11.4087	12.1539	12.0747	10.3364	11.4605	10.7517	11.2534	coding	NM_014061	MAGEH1	RefSeq_coding	1475	chrX	+	55478537	55479998		CTGCTGTTGTGTGAAGATTGACATTTACCATGATTTTCCTTAGTTACTGCAGAACATAGA	28986	Hs.279819	GO:0006915|GO:0005737	NP_054780	Melanoma antigen family H, 1
ASHG19A3A040673	0.0354228	1.53733	down	3252.31	4909.76	11.5335	12.1539	2893.39	2958.76	2814.9	4210.49	3052.45	5488.2	8904.25	1350.83	4782.77	3408	4198.61	12.084	11.4087	11.4003	11.8517	12.3522	11.8511	12.6305	10.8873	12.3015	11.4579	11.7451	coding	NM_001649	SHROOM2	RefSeq_coding	7445	chrX	+	9754495	9917481		TCACCTATCAACAGATCATCCTGCTTGACTGTAACAAAATAAATAGTGTCTCTTCAAGTG	357	Hs.567236	GO:0003779|GO:0051015|GO:0008013|GO:0015280|GO:0005515|GO:0019904|GO:0051017|GO:0045176|GO:0007420|GO:0043010|GO:0048593|GO:0016477|GO:0000902|GO:0000902|GO:0045217|GO:0043482|GO:0043583|GO:0032401|GO:0008057|GO:0002089|GO:0032438|GO:0007275|GO:0030835|GO:0016324|GO:0005938|GO:0005913|GO:0030864|GO:0030864|GO:0005737|GO:0005856|GO:0031941|GO:0005874|GO:0043025|GO:0005886|GO:0005923	NP_001640	Shroom family member 2
ASHG19A3A033472	0.0317212	3.97527	down	21.8574	91.2773	4.02738	6.01843	58.7587	26.2987	20.3029	162.297	22.4389	51.5898	161.302	16.5119	6.56972	5	56.4611	6.69682	4.59002	4.35355	7.26707	3.89545	5.20579	7.02703	4.23225	3.00795	2.35107	5.62943	coding	NM_001136002	TMEM229A	RefSeq_coding	2569	chr7	-	123670970	123673523		GGAACTTCAAGGGCAGAAACATTACCTTTGAATAAAATGAACCTGAATGTTCACTCTAAT	730130	Hs.450249	GO:0003700|GO:0006355|GO:0042025|GO:0016021|GO:0016020	NP_001129474	Transmembrane protein 229A
ASHG19A3A047718	0.00503227	1.77431	down	15.57	27.6378	3.9142	4.74146	19.2337	11.0242	15.7629	33.925	27.4792	35.6822	21.8692	12.9995	20.0332	16.4749	17.1252	5.09665	3.33322	3.95804	5.08923	4.34229	4.7495	4.42961	3.87756	4.53816	3.86141	3.9168	coding	NM_005379	MYO1A	RefSeq_coding	3624	chr12	-	57422301	57443893		TGTGATTCTCACAGACACCAAGAAGTCCCAGGCCAAAATTGTCATTGGGCTAGACAATGT	4640	Hs.5394	GO:0005524|GO:0003779|GO:0005516|GO:0003774|GO:0000166|GO:0030030|GO:0030033|GO:0007605|GO:0051648|GO:0016324|GO:0009925|GO:0016323|GO:0005903|GO:0030864|GO:0005737|GO:0031941|GO:0016328|GO:0005902|GO:0016459	NP_005370	Myosin IA
ASHG19A3A038997	0.0458212	1.65227	down	629.371	976.048	9.21603	9.94047	649.875	459.848	436.242	892.765	1129.8	1201.6	1006.2	552.891	895.353	665.449	766.442	10.0727	8.66945	8.77882	9.65325	10.8684	9.53402	9.57399	9.51826	9.94727	9.07949	9.30287	coding	NM_001170741	FAM22G	RefSeq_coding	2516	chr9	+	99691285	99701700	NM_017561,	AAAGAGAAAGGGTGACCCCTTGGCCTCCAGGAGGAAGAAGAAGCGGCATTGTAGCCAGTA	441457	Hs.652383		NP_001164212	Family with sequence similarity 22, member G
ASHG19A3A029587	0.00358901	1.51123	down	22.3681	33.6827	4.45392	5.04964	20.4078	18.626	23.035	27.8607	40.6466	42.8949	36.6035	21.8221	21.9224	30.2881	18.5148	5.18412	4.10737	4.54811	4.81924	5.19981	4.97938	5.06564	4.64835	4.66934	4.72629	4.02405	coding	NM_145909	ZNF323	RefSeq_coding	3176	chr6	-	28292516	28321972		AGAGAGAGAAAAACTGCTGACCCTGTAAGAGAGAACTGGCCATCTTGCAGACAGACAGAG	64288	Hs.656413	GO:0003677|GO:0046872|GO:0003700|GO:0008270|GO:0006355|GO:0016032|GO:0005622|GO:0005634	NP_665916	Zinc finger protein 323
ASHG19A3A045309	0.00109454	1.97798	down	7.4697	14.8327	2.80737	3.7914	7.3188	5	6.6031	11.9888	23.1283	21.2723	10.4553	5	8.0371	10.6952	9.48278	3.72058	2.35386	2.64762	3.61697	3.95907	4.11438	3.54599	2.36059	3.24137	3.23269	3.0081	coding	NM_173587	RCOR2	RefSeq_coding	2621	chr11	-	63678693	63684316		TATTGCAGAGGTGATTGGGAACAAGACTCTGACCCAGGTGAAGACTTTCTTTGTGAGCTA	283248	Hs.98788	GO:0003677|GO:0003700|GO:0003714|GO:0000785|GO:0005634|GO:0005667	NP_775858	REST corepressor 2
ASHG19A3A011466	0.0281132	1.92418	down	5.80361	15.0586	2.48985	3.4341	5	5.97414	5	10.6935	12.7395	33.3557	13.5042	5	5	6.14853	7.69897	2.53526	2.5693	2.35229	3.45536	2.66045	4.66486	3.85455	2.36059	2.39419	2.54587	2.71688	coding	NM_013368	SERTAD3	RefSeq_coding	1527	chr19	-	40946748	40948505		GCTCCATGTTTGAAGAAATTAATATTGTGGAAGAACAGTTTTAAGGCTTAGAGGAACTTG	29946	Hs.515412	GO:0005515|GO:0016563|GO:0030308|GO:0005634	NP_976219	SERTA domain containing 3
ASHG19A3A053141	0.0111264	2.55305	down	9.81814	23.4591	3.14165	4.49387	17.6803	12.0142	9.05969	18.3451	53.4337	13.3259	14.5106	5.34932	5	13.8784	13.6072	4.97439	3.45882	3.07898	4.23652	5.78334	3.53477	3.94033	2.73003	2.39419	3.6183	3.56961	coding	NM_015206	KIAA1024	RefSeq_coding	6742	chr15	+	79724857	79764642		TCAATGAGGAGGAGATAAAAGACACAGGCCCAGGAGATAATAAAGACTGGCATCGGAAAT	23251	Hs.301654	GO:0016021|GO:0016020	NP_056021	KIAA1024
ASHG19A3A032245	0.0399504	1.54922	down	18.8867	31.4124	4.18903	4.82056	14.8552	11.4986	22.2715	17.2471	35.635	39.6436	49.681	18.7846	15.6954	21.1847	23.8853	4.71661	3.39565	4.49995	4.14853	4.90284	4.88117	5.45367	4.42625	4.18764	4.22795	4.3967	coding	NM_001008504	OPRM1	RefSeq_coding	1867	chr6	+	154360442	154413073		ATTTCTCAAAAGCCAGTCTTGCTCTGGTTCTGTGATTAAAGAGAGAGGGTGAGTGCCTTG	4988	Hs.2353	GO:0004930|GO:0004988|GO:0005515|GO:0004872|GO:0007187|GO:0007191|GO:0002438|GO:0007610|GO:0031635|GO:0007626|GO:0008285|GO:0032100|GO:0060079|GO:0051930|GO:0042220|GO:0032094|GO:0070848|GO:0032496|GO:0043278|GO:0007600|GO:0042060|GO:0005794|GO:0032839|GO:0032590|GO:0005783|GO:0005925|GO:0005887|GO:0044424|GO:0005624|GO:0045121|GO:0043204|GO:0005886|GO:0005886|GO:0042383	NP_001138759	Opioid receptor, mu 1
ASHG19A3A043035	0.0184096	2.97	down	7.04324	23.4789	2.69255	4.26301	7.70395	5	11.3345	20.1583	60.0181	5.41609	24.0978	5	5	5.71093	10.214	3.78766	2.35386	3.43136	4.36814	6.02866	2.58286	4.54772	2.36059	2.39419	2.4967	3.11859	coding	NM_138812	DYDC1	RefSeq_coding	790	chr10	-	82095863	82116500		TGGCATTGCAGCTAGAGTTGGAAATGCAAGAAAAGGAGAGGCAGAGAATACAAGAACTAC	143241	Hs.407751		NP_620167	DPY30 domain containing 1
ASHG19A3A009914	0.0460412	1.6604	down	245.256	383.399	7.86792	8.59945	265.665	200.655	225.653	328.478	437.012	513.676	372.163	224.314	360.222	177.329	283.361	8.84194	7.45822	7.8452	8.26417	9.42716	8.28366	8.18032	8.14696	8.66475	7.20254	7.88983	coding	NM_017728	TMEM104	RefSeq_coding	4763	chr17	+	72772621	72835920		CGTTTGAAATCACAGACCGGGTGGAAATGGGACAAATGGCCTCCATGTTCTTCAATAAAG	54868	Hs.370262	GO:0003674|GO:0008150|GO:0005575|GO:0016021|GO:0016020	NP_060198	Transmembrane protein 104
ASHG19A3A021908	0.0484706	1.5366	down	20.4868	32.248	4.26753	4.88727	14.4738	17.8216	11.2525	32.8446	31.803	50.9014	31.2173	25.4196	20.9391	17.1387	30.3491	4.67988	4.04268	3.41816	5.04719	4.65638	5.18776	4.86515	4.87294	4.60124	3.92279	4.7474	coding	NM_032487	ARPM1	RefSeq_coding	2017	chr3	-	169484712	169487683		AGAGTTGAATCTTTTGATGCGAAAGTCGGGTTTTCCTGATACTGGGATTCCGGGATTCCA	84517	Hs.135411	GO:0005737|GO:0005856	NP_115876	Actin related protein M1
ASHG19A3A001258	0.0340477	2.02339	down	11.7736	24.0234	3.31776	4.33453	9.5386	17.3176	6.94918	18.4734	18.9796	41.129	31.9963	5	6.64617	20.2285	14.5	4.0812	3.9987	2.70296	4.2473	3.52314	4.9257	4.89534	2.36059	3.02071	4.16186	3.66172	coding	NM_001037334	USP14	RefSeq_coding	4051	chr18	+	158482	213739		TGATTGGGGAAACATCAAAATAAAAAATATGGAGTTACCATGTGGATTGACAAACCTTGG	9097	Hs.464416	GO:0004197|GO:0004866|GO:0008233|GO:0070628|GO:0005515|GO:0008193|GO:0004221|GO:0004843|GO:0010951|GO:0050920|GO:0061136|GO:0007268|GO:0006511|GO:0009986|GO:0005737|GO:0016023|GO:0005886|GO:0000502|GO:0005625|GO:0019717	NP_005142	Ubiquitin specific peptidase 14 (tRNA-guanine transglycosylase)
ASHG19A3A020988	0.0101757	1.93783	down	71.4236	125.738	6.04965	7.00409	84.1554	71.752	55.4363	146.44	128.173	136.262	133.662	40.5661	125.091	68.7639	66.9324	7.21084	5.99166	5.84548	7.12229	7.448	6.46915	6.77016	5.57373	7.1456	5.87405	5.86736	coding	NM_013270	PRSS50	RefSeq_coding	1363	chr3	-	46753605	46759373		TCACAGCCCTGAGAGTCAGGGTGGAGATGAGGTGCTCAATTAAACATTACTGTTTTCCAT	29122	Hs.120365	GO:0008233|GO:0004252|GO:0004298|GO:0006508|GO:0005737|GO:0005783	NP_037402	Protease, serine, 50
ASHG19A3A027796	0.0325496	1.61787	down	5.71892	11.0746	2.53491	3.22901	5	5	5	8.1675	21.164	12.9859	8.05534	5	9.31355	5	5	2.53526	2.35386	2.35229	3.08684	3.76554	3.49956	3.25786	2.36059	3.44441	2.35107	2.34725	coding	NM_203412	UBL4B	RefSeq_coding	1510	chr1	+	110655061	110656568		GCAGCCTAGATGCAGAGAGCTGCTATACATGTGAAAAGTAAAGTGGTGACATGAAACTAG	164153	Hs.374027	GO:0005737	NP_981957	Ubiquitin-like 4B
ASHG19A3A018337	0.000944736	2.07225	down	19.0739	37.7011	4.20214	5.25334	25.5345	21.5541	21.179	33.8137	58.0704	42.9574	28.1295	13.9735	12.9479	24.3176	20.4715	5.50387	4.31177	4.41845	5.08436	5.95852	4.98115	4.73879	3.98261	3.91044	4.41714	4.17242	coding	NM_170693	SGK2	RefSeq_coding	1862	chr20	+	42187685	42214272		TTGACAAGTCAGGATTGTGCCTCCAGTCAGAAGGACCATGAAGAGAGAGAAGAGGGCAGA	10110	Hs.300863	GO:0005524|GO:0000166|GO:0015459|GO:0004674|GO:0017080|GO:0016740|GO:0007243|GO:0006468|GO:0006979|GO:0005575	NP_733794	Serum/glucocorticoid regulated kinase 2
ASHG19A3A039353	0.0375856	1.59191	down	9.81263	15.2695	3.22286	3.89362	10.4541	11.5254	10.9642	12.7379	29.6766	12.841	10.6382	13.9861	6.5043	7.09098	8.80486	4.20368	3.39978	3.37445	3.70401	4.50598	3.484	3.57044	3.9839	2.99392	2.68102	2.90408	coding	NM_005085	NUP214	RefSeq_coding	6614	chr9	+	134000980	134109090		AGCAAAATTATTCCTCAAGGGGCCGATAGCACAATGCTTGCCACGAAAACCGTGAAACAT	8021	Hs.654530	GO:0005487|GO:0005515|GO:0005215|GO:0016070|GO:0005975|GO:0015758|GO:0008645|GO:0006406|GO:0016071|GO:0006611|GO:0006606|GO:0015031|GO:0051726|GO:0010827|GO:0055085|GO:0016032|GO:0005829|GO:0005829|GO:0005643|GO:0005654|GO:0005634	NP_005076	Nucleoporin 214kDa
ASHG19A3A020301	0.00869497	1.82007	down	6.57748	13.3328	2.69021	3.5542	6.70823	5.15381	7.06586	10.6781	19.219	24.3946	5.66391	6.10584	5	11.1394	5	3.60083	2.46608	2.72501	3.45301	3.54787	4.27624	2.89306	2.91158	2.39419	3.29714	2.34725	coding	NM_021026	RFPL1	RefSeq_coding	1496	chr22	+	29834571	29838443		ACGCTCTACTCGGTAAAAGCGTTATACAAAGTCATAGGAGAAAAATATGGGACAATTCAT	5988	Hs.648249	GO:0046872|GO:0008270	NP_066306	Ret finger protein-like 1
ASHG19A3A016991	0.0430355	2.04626	down	298.542	528.619	7.93552	8.96851	240.712	511.373	184.916	469.035	448.953	601.826	882.57	76.3718	401.427	387.915	229.248	8.7072	8.82185	7.56338	8.75676	9.47007	8.51524	9.3933	6.51516	8.81875	8.30401	7.58999	coding	NM_025216	WNT10A	RefSeq_coding	2375	chr2	+	219745254	219758651		CTTGGAGGTTACATTCTTGCTGGGGGGAGGCATGGGCAATAAACAAGTAAATATACAAAC	80326	Hs.121540	GO:0001664|GO:0004871|GO:0007223|GO:0009952|GO:0009798|GO:0060070|GO:0071560|GO:0048730|GO:0008585|GO:0001942|GO:0031069|GO:0007275|GO:0010553|GO:0042476|GO:0010552|GO:0042487|GO:0048733|GO:0043588|GO:0043586|GO:0005576|GO:0005615|GO:0005886|GO:0005578	NP_079492	Wingless-type MMTV integration site family, member 10A
ASHG19A3A006226	0.0034851	2.05641	down	8.04637	15.4027	2.89252	3.93265	14.2466	12.4188	5	12.5874	22.1778	16.9303	11.0714	7.25002	5	10.0503	8.55905	4.65601	3.50936	2.35229	3.68672	3.86915	3.83337	3.61801	3.09562	2.39419	3.14569	2.85797	coding	NM_153362	PRSS35	RefSeq_coding	2527	chr6	+	84222193	84235419		CTCGGGGACCAAACAAGCCTGGCAGGACAAAATTAGAAGATCAAAATGGAAAATATGCTG	167681	Hs.98381	GO:0003824|GO:0004252|GO:0006508|GO:0005576|GO:0005739	NP_699193	Protease, serine, 35
ASHG19A3A046579	0.00956377	1.82433	down	5.99974	12.1933	2.50697	3.37434	5	5	5	14.8911	19.4285	13.3491	8.29797	5	5	5	10.9985	2.53526	2.35386	2.35229	3.93433	3.57316	3.53702	3.29192	2.36059	2.39419	2.35107	3.22985	coding	NM_001008778	SPDYC	RefSeq_coding	882	chr11	+	64937706	64940687		ATGTGAGATTTTTCCATGGGCCCTGGGAAAAGATTGGTGTTTACGAGTGGGGAAATTCCT	387778	Hs.450642	GO:0019901|GO:0007049|GO:0005634	NP_001008778	Speedy homolog C (Xenopus laevis)
ASHG19A3A011642	0.0384093	1.81648	down	25.2216	48.714	4.62478	5.48592	23.131	27.189	24.5322	31.1545	66.4144	31.5328	91.3374	35.5502	20.6091	22.8891	20.5599	5.36014	4.63426	4.64362	4.97119	6.24071	4.59592	6.26164	5.37915	4.57951	4.33389	4.17823	coding	NM_000234	LIG1	RefSeq_coding	3083	chr19	-	48618702	48673560		ATTTTTCCACCCCAAGAAAGAGGGTAAAGCAAAGAAGCCTGAGAAGGAGGCATCCAATAG	3978	Hs.1770	GO:0005524|GO:0003677|GO:0003910|GO:0003909|GO:0003909|GO:0003909|GO:0016874|GO:0046872|GO:0000166|GO:0006266|GO:0051103|GO:0006259|GO:0006310|GO:0006281|GO:0006260|GO:0006271|GO:0000084|GO:0033151|GO:0009653|GO:0006284|GO:0051301|GO:0006302|GO:0000724|GO:0000278|GO:0006289|GO:0006297|GO:0000723|GO:0000722|GO:0032201|GO:0006283|GO:0005654|GO:0005654|GO:0005634	NP_000225	Ligase I, DNA, ATP-dependent
ASHG19A3A003740	0.0114081	2.1688	down	6.0065	15.1847	2.53621	3.65311	9.09597	6.79089	8.41927	9.19507	26.4184	26.2142	5	5	5	5	5.82885	4.01544	2.67977	2.96495	3.24199	4.25172	4.36489	2.3915	2.36059	2.39419	2.35107	2.46669	coding	NM_001174082	NLRP2	RefSeq_coding	3524	chr19	+	55477710	55512508		GAGCGCTTCAAAACAGAAGCACAAGACAAAGACAATAGGTGCAGGTATATATTGAAGACG	55655	Hs.369279	GO:0005524|GO:0032090|GO:0000166|GO:0005515|GO:0006915|GO:0043280|GO:0050718|GO:0005737	NP_060322	NLR family, pyrin domain containing 2
ASHG19A3A021252	0.0496496	2.89014	down	12.5942	32.0671	3.38964	4.92078	36.998	5	10.5672	27.6732	67.619	15.0499	12.9954	9.57203	30.4452	14.981	5	6.02894	2.35386	3.3152	4.80794	6.27505	3.68491	3.80705	3.44914	5.14352	3.72887	2.34725	coding	NM_001126128	PROK2	RefSeq_coding	1613	chr3	-	71820806	71834357		AACAATTTTGGAAATGGAAGGCAGGAAAGAAGAAAGAGGAAGAGAAGCAAAAGGAAAAAG	60675	Hs.528665	GO:0001664|GO:0007186|GO:0000187|GO:0001525|GO:0006916|GO:0008283|GO:0006935|GO:0007623|GO:0007204|GO:0006954|GO:0007218|GO:0045987|GO:0019233|GO:0007283|GO:0005576|GO:0005576	NP_068754	Prokineticin 2
ASHG19A3A041359	0.0487359	1.64159	down	37.6711	56.9663	5.14131	5.8564	34.6394	66.5144	24.8513	56.0375	82.9512	59.3668	51.8364	35.0478	40.4218	31.8782	27.3132	5.93647	5.88728	4.66408	5.78	6.66697	5.38869	5.50988	5.35857	5.54505	4.79831	4.59457	coding	NM_152423	MUM1L1	RefSeq_coding	4320	chrX	+	105412297	105452948		CGGCCAGTATTGGGGGAGGGGCAGCATTTCAAGAGGCTGCAGCTGACAAGAAGCTTCAAG	139221	Hs.592221		NP_689636	Melanoma associated antigen (mutated) 1-like 1
ASHG19A3A013866	0.0342972	2.16802	down	6.39469	18.0429	2.63368	3.75006	5	5	5	9.67703	24.6334	34.0539	16.8504	5	13.3649	5.00325	5	2.53526	2.35386	2.35229	3.31007	4.101	4.69008	4.11391	2.36059	3.96039	2.42772	2.34725	coding	NM_001005484	OR4F5	RefSeq_coding	918	chr1	+	69090	70008	NM_001005240,NM_001004195,	ATGAAGACGGCAATAAGACAGCTGAGAAAATGGGATGCACATTCTAGTGTAAAGTTTTAG	79501	Hs.554500	GO:0004984|GO:0004872|GO:0050896|GO:0007608|GO:0016021|GO:0005886	NP_001005484	Olfactory receptor, family 4, subfamily F, member 5
ASHG19A3A017961	0.0470346	1.70171	down	51.922	82.5708	5.56115	6.32814	35.477	43.0254	53.8501	82.3606	96.0752	89.6694	109.272	23.3605	71.4725	82.478	37.3455	5.96799	5.27235	5.80697	6.31606	6.93561	5.92291	6.49812	4.74923	6.36077	6.1341	5.04351	coding	NM_014723	SNPH	RefSeq_coding	5026	chr20	+	1246959	1289969		TTGTTCAGACAGAGTTGTACCTGCAGCAGACAACTCTGAATTAAAGCATGAAAACACAGC	9751	Hs.323833	GO:0017075|GO:0007269|GO:0016081|GO:0030054|GO:0005575|GO:0016021|GO:0016020|GO:0005739|GO:0045202|GO:0019717	NP_055538	Syntaphilin
ASHG19A3A038837	0.0427382	1.70739	down	7.50875	13.7349	2.83278	3.60457	5.17333	9.5084	8.92377	8.37375	26.6145	9.28717	19.2258	5	9.8558	5	6.76454	3.27202	3.12321	3.05772	3.11859	4.27032	3.09055	4.27139	2.36059	3.52347	2.35107	2.58064	coding	NM_001145197	FLJ43859	RefSeq_coding	4923	chr9	+	84543342	84549913	NR_026851,ENST00000376459,	GATGTGCCTTTACTAACTGGACACAAAATGCATTGGAAGTATTTGCAGGGAGGCAAATCT	389761	Hs.722630	GO:0016021|GO:0016020	NP_001138669	Family with sequence similarity 75, member D4
ASHG19A3A012404	0.000292235	1.69095	down	142.043	228.864	7.09832	7.85616	160.15	154.254	125.952	228.379	208.171	303.826	243.792	102.39	127.797	166.178	175.686	8.10795	7.0767	7.03223	7.74277	8.25956	7.55832	7.61222	6.9627	7.17812	7.11566	7.22454	coding	NM_001033930	UBA52	RefSeq_coding	2823	chr19	+	18682613	18688269		CACTCTTAATGGACAAAAAGAAAGAAAGGGGAGGGAGTAACAGGGATATGAGCTCTAGCC	7311	Hs.5308	GO:0005515|GO:0003735|GO:0006977|GO:0006281|GO:0000082|GO:0007249|GO:0007254|GO:0000216|GO:0002755|GO:0002755|GO:0002756|GO:0002756|GO:0016070|GO:0000084|GO:0050852|GO:0008063|GO:0000187|GO:0031145|GO:0031145|GO:0006916|GO:0006915|GO:0006915|GO:0000075|GO:0016044|GO:0044267|GO:0031018|GO:0016197|GO:0007173|GO:0010467|GO:0008624|GO:0045087|GO:0016071|GO:0000278|GO:0042059|GO:0032480|GO:0051436|GO:…	NP_003324	Ubiquitin A-52 residue ribosomal protein fusion product 1
ASHG19A3A014061	0.0151126	2.00171	down	6.6441	13.3768	2.6799	3.68113	9.6063	8.10086	5	9.01816	26.9584	8.89891	12.4022	11.7637	5	5	5	4.09059	2.90076	2.35229	3.21795	4.30045	3.04285	3.75383	3.73382	2.39419	2.35107	2.34725	coding	NM_144994	ANKRD23	RefSeq_coding	2591	chr2	-	97503651	97509758		TAACCTGGCTGACTTGGAAAACTTGGTTCAAAGACGGAAAAAGCGACTGAGACACAGAGT	200539	Hs.643430	GO:0006631|GO:0031674|GO:0005634	NP_659431	Ankyrin repeat domain 23
ASHG19A3A045003	0.0119239	1.57032	down	162.09	245.056	7.31485	7.96591	188.095	165.972	155.109	231.607	225.018	295.112	285.448	175.735	165.185	143.451	167.09	8.34649	7.18718	7.31569	7.75985	8.38247	7.51409	7.82667	7.77382	7.5478	6.9101	7.15454	coding	NM_147199	MRGPRX1	RefSeq_coding	1190	chr11	-	18955360	18956549	NM_054031,	TGTTCATCTAGTTTCTATTTTCCTGTCCGCTCTTAACAGCAGTGCCAACCCCATCATTTA	259249	Hs.711459	GO:0004930|GO:0004872|GO:0006953|GO:0016021|GO:0005886	NP_671732	MAS-related GPR, member X1
ASHG19A3A042328	0.0341933	1.70832	down	15.4276	25.8467	3.87188	4.64446	12.9649	23.3039	19.1597	23.2065	50.9495	19.1276	22.9848	12.6175	10.0631	12.0111	15.4105	4.5117	4.4212	4.25767	4.56184	5.68404	3.97525	4.48944	3.83409	3.55478	3.41245	3.75106	coding	NM_001004697	OR2T5	RefSeq_coding	948	chr1	+	248651889	248652837	NM_001004694,	CTTAGGAATAAGGATGTCATGGGGGCTCTGAAGAAAATGTTAACTGTGAGATTCGTCCTT	401993	Hs.553808	GO:0004984|GO:0004872|GO:0050896|GO:0007608|GO:0016021|GO:0005886	NP_001004697	Olfactory receptor, family 2, subfamily T, member 5
ASHG19A3A020206	0.0096384	1.98639	down	86.9671	173.521	6.42326	7.41341	126.095	93.8935	80.4041	111.001	195.059	143.688	291.761	88.2536	76.9956	91.0718	91.1841	7.77423	6.37456	6.38565	6.73445	8.15681	6.54008	7.86147	6.73398	6.4679	6.26942	6.30803	coding	NM_182520	C22orf15	RefSeq_coding	879	chr22	+	24105207	24108049		GACAGGCCATCGAGAGAGGCACACAACAGGCTGTGGTCTAAAATAAACTTTTAATTGCAC	150248	Hs.116254		NP_872326	Chromosome 22 open reading frame 15
ASHG19A3A013875	0.00694852	1.90303	down	14.0504	28.075	3.76988	4.69818	10.477	10.2371	15.5669	21.4361	46.3981	39.4833	22.5806	18.1193	12.2305	14.3877	13.7607	4.20704	3.22334	3.93699	4.45206	5.4892	4.87438	4.46823	4.37101	3.83304	3.66942	3.58551	coding	NM_138804	C2orf65	RefSeq_coding	2558	chr2	-	74785018	74875164		TTCTGACTTCTCAGCCTGGAAAAGAGGTGGTCAAACAGTTGGAGGAAGGGTTGAAAGATA	130951	Hs.348645	GO:0003674|GO:0006396|GO:0031497|GO:0007292|GO:0007283|GO:0016021	NP_620159	Chromosome 2 open reading frame 65
ASHG19A3A020993	0.00879632	1.74707	down	16.0731	27.9051	3.9671	4.77204	15.1198	18.047	13.773	22.5692	46.763	21.84	33.2334	17.7944	12.8853	20.4029	13.5363	4.73992	4.06118	3.7551	4.5218	5.50848	4.14675	4.94322	4.34574	3.90459	4.17379	3.56217	coding	NM_182702	PRSS42	RefSeq_coding	882	chr3	-	46871894	46875585		GGATGTAATAATAAAAGGGATGGTCTGTGGCTATAAAGAACAAGGAAAGGATTCTTGTCA	339906	Hs.585127	GO:0008233|GO:0004252|GO:0006508|GO:0005576	NP_874361	Protease, serine, 42
ASHG19A3A016007	0.0323196	1.79279	down	12.3737	21.9637	3.49226	4.33446	10.2055	12.7422	13.1939	22.7834	33.9074	32.5429	10.3794	14.4283	5	11.8455	17.0321	4.16802	3.54575	3.68424	4.53565	4.79611	4.63551	3.53702	4.02733	2.39419	3.39278	3.90925	coding	NM_001037228	LOC285033	RefSeq_coding	537	chr2	+	96905976	96907701		AAGCATCTGTTTTTGTCATCAAGGAGGGGGCTGTATGTGGAATTGCAAGGCCAAAGACAT	285033	Hs.58648		NP_001032305	Hypothetical protein LOC285033
ASHG19A3A042058	0.0416856	2.04604	down	22.0848	41.0172	4.28091	5.31374	16.4205	14.2982	21.7757	43.9018	66.4523	36.5757	41.7355	6.21781	29.7776	30.4641	29.9752	4.86559	3.71816	4.46173	5.45115	6.24269	4.77854	5.23076	2.92924	5.10999	4.7349	4.73142	coding	NM_003308	TSPY1	RefSeq_coding	1171	chrY	+	9304563	9307357	NM_001164471,NM_001077697,ENST00000457163,ENST00000449843,ENST00000448518,	AATGCCCAAGCCAGGAAGGCCTTTTCTCGGCAGCGGGAAAAGATGGAGCGGAGGCGCAAG	7258	Hs.647493	GO:0042802|GO:0003674|GO:0005515|GO:0030154|GO:0008283|GO:0007506|GO:0007275|GO:0006334|GO:0007548|GO:0007283|GO:0005575|GO:0005737|GO:0005634	NP_003299	Testis specific protein, Y-linked 1
ASHG19A3A001057	0.00825159	2.48864	down	9.66384	23.3952	3.12315	4.43851	9.92993	7.74507	10.6721	25.7245	44.3505	26.0558	10.9152	12.8252	5	6.13929	15.6014	4.13408	2.83765	3.33208	4.70739	5.39305	4.35798	3.60007	3.85779	2.39419	2.54455	3.77266	coding	NM_001018074	NR3C1	RefSeq_coding	6614	chr5	-	142657496	142815077		GGGGAAGGAATAGAAACAGAAAGAGGTTGATATTCACTGATGGACTCCAAAGAATCATTA	2908	Hs.122926	GO:0003682|GO:0003690|GO:0004883|GO:0031072|GO:0046872|GO:0005515|GO:0032403|GO:0046982|GO:0042803|GO:0030971|GO:0043565|GO:0003700|GO:0005496|GO:0016563|GO:0008270|GO:0030325|GO:0006916|GO:0048096|GO:0010467|GO:0043402|GO:0008211|GO:0042921|GO:0060603|GO:0030512|GO:0043525|GO:0042127|GO:0031946|GO:0006111|GO:0034339|GO:0006355|GO:0046685|GO:0051789|GO:0007165|GO:0006366|GO:0006351|GO:0005737|GO:…	NP_001191194	Nuclear receptor subfamily 3, group C, member 1 (glucocorticoid receptor)
ASHG19A3A015047	0.00441004	2.16153	down	5.53886	13.1378	2.4406	3.55265	5.5265	5	5	10.3254	33.0137	7.07828	9.74538	5	5	5.8147	7.41843	3.35764	2.35386	2.35229	3.40222	4.73945	2.7942	3.46974	2.36059	2.39419	2.50759	2.67508	coding	NM_000438	PAX3	RefSeq_coding	1489	chr2	-	223158348	223163700		ATTGTAGGGCCGGGGATAGAGGGTACTTGAATCTTCAGAAGTTGAAGTAGCTTTTATGCC	5077	Hs.42146	GO:0005515|GO:0043565|GO:0003700|GO:0016563|GO:0006915|GO:0007275|GO:0009887|GO:0010552|GO:0006355|GO:0007605|GO:0006366|GO:0005634	NP_852126	Paired box 3
ASHG19A3A047399	0.0212362	1.82805	down	15.1852	27.7856	3.81352	4.68382	12.1191	18.3933	20.7948	34.7012	28.8775	38.2334	24.9966	10.7972	13.0549	6.7034	21.3678	4.41915	4.0885	4.39173	5.1204	4.44925	4.83386	4.59641	3.61858	3.92375	2.62422	4.23431	coding	NM_006940	SOX5	RefSeq_coding	4333	chr12	-	23685231	24102637		AGGGAAATTGTGCTTTTCCAGCATGCTTACTGACCCTGATTTACCTCAGGAGTTTGAAAG	6660	Hs.657542	GO:0003677|GO:0010843|GO:0005515|GO:0046982|GO:0003700|GO:0051216|GO:0045165|GO:0021953|GO:0001701|GO:0045892|GO:0048709|GO:0045944|GO:0060164|GO:0006366|GO:0005634	NP_821078	SRY (sex determining region Y)-box 5
ASHG19A3A035950	0.0117447	2.28051	down	6.07257	14.7021	2.52151	3.71087	10.5467	5	5	9.00569	27.5969	5	21.361	5	5	8.09798	8.33747	4.2181	2.35386	2.35229	3.21539	4.35298	2.36492	4.40294	2.36059	2.39419	2.84383	2.82431	coding	NM_175634	RUNX1T1	RefSeq_coding	3217	chr8	-	92971151	93088364		GAGCACTGAGTTTAGTAATAGGTGACTGCCGGAAAAAAGGGAACTTTGAATATTGTCAAG	862	Hs.368431	GO:0046872|GO:0005515|GO:0042803|GO:0003700|GO:0016564|GO:0008270|GO:0045444|GO:0006091|GO:0051101|GO:0006355|GO:0006351|GO:0005634	NP_783554	Runt-related transcription factor 1; translocated to, 1 (cyclin D-related)
ASHG19A3A031988	0.0257343	1.68353	down	222.544	375.609	7.67929	8.43078	213.858	332.953	212.887	347.536	198.197	443.235	675.218	106.16	270.944	166.516	245.804	8.53652	8.21023	7.7636	8.33704	8.18388	8.07535	9.02112	7.01782	8.27213	7.11862	7.69336	coding	NM_153711	FAM26E	RefSeq_coding	3556	chr6	+	116832807	116839708		TTTCTACGTACAATATCTTTGGGAACTTGGAGGTGCAGGGTCAGACGTCTGTGTGTGTAT	254228	Hs.660142	GO:0016021|GO:0016020	NP_714922	Family with sequence similarity 26, member E
