# Supplementary material for: LncRNAs Expression in Preeclampsia Placenta Reveals the Potential Role of LncRNAs Contributing to Preeclampsia Pathogenesis
Source: PLoS One. 2013 Nov 28;8(11):e81437. doi: 10.1371/journal.pone.0081437 (PMC3842959; doi:10.1371/journal.pone.0081437)
Supplement: Table S9 — Primer Catalog. We thank all of the participants in this program, all our colleagues who contributed to the generation of the placenta tissue at Jiangxi Maternal and Child Health Hospital, Nanchang Medical College and all our collaborators at the microarray service at KangChen Bio-technology Company in Shanghai. (XLS) [file pone.0081437.s009.xls]

## Sheet: Sheet1
GAPDH	F	accacagtccatgccatcac	R	tccaccaccctgttgctgta
LOC391533	F	cttttgccaaatgccacctc	R	ctgatgtgcccactgttgga
LOC284100	F	tcttgcagctttgccattga	R	tcaaaattcagccaccccac
CEACAMP8	F	tgtgtccctttcacagacca	R	gttattcccattcagcagcc
